# Supplementary material for: Validating laboratory predictions of soil rewetting respiration pulses using field data
Source: Copernicus journal article supplement (doi:10.5194/bg-22-2691-2025), 2025-06-13
Supplement: Supplementary file 1 [file bg-22-2691-2025-supplement.zip]

## Sheet: Data description
Data description
Validating laboratory predictions of rewetting respiration pulses using field data
Authors: Xiankun Li a,b,*, Marleen Pallandt a,b, Dilip Naiduc,d, Johannes Rouske, Gustaf Hugelius a,b, Stefano Manzoni a,b
a Department of Physical Geography, Stockholm University, Stockholm, Sweden
b Bolin Centre for Climate Research, Stockholm University, Stockholm, Sweden
c Divecha Centre for Climate Change, Indian Institute of Science, Bengaluru 560012, India
d School of Environment and Sustainability, Indian Institute for Human Settlements, Bengaluru 560080, India
e Microbial Ecology, Department of Biology, Lund University, Lund, Sweden
Laboratory metadata and data
Data point unique ID	Identifier for individual data points
Data source ID	Identifier for data source paper
Reference	Reference of the data source including authors, title, publication year and DOI
Longitude	Longitude at the sampling site
Latitude	Latitude at the sampling site
Land cover	Landcover at the sampling site
Aridity index (-)	Ratio of mean annual precipitation over potential evapotranspiration at the sampling site
Soil sampling depth (cm)	Soil sampling depth at the sampling site, soils from the whole profile were mixed for laboratory drying and rewetting events
Soil organic carbon content (g kg-1)	Soil organic carbon content at the sampling site
Incubation temperature (°C)	Temperature during the laboratory incubation
Dryness (%WHC)	Soil moisture reached at the end of the drying phase
Rewetting intensity (%WHC)	Soil moisture increment at rewetting
Drying length (days)	Duration of soil drying phase
DRW cycle number	Progressive number of the drying and rewetting (DRW) cycle through the whole laboratory experiment
Respiration rate (µg C g-1h-1)	Mean respiration rate over 48 hours after rewetting
Field site metadata
Dataset ID	Identifier for individual dataset source in the COSORE database (matching Dataset ID in sheet 'Field data')
Longitude	Longitude at the sampling site
Latitude	Latitude at the sampling site
Land cover	Landcover at the sampling site
Aridity Index (-)	Ratio of mean annual precipitation over potential evapotranspiration at the sampling site
Soil moisture sensor depth (cm)	Soil moisture sensor depth at the sampling site
Soil temperature sensor depth (cm)	Soil temperature sensor depth at the samling site
Soil organic carbon content (g kg-1)	Soil organic carbon content at the sampling site
Additional data source	Author (year) of data source
DOI	DOI of data source
Field data
Dataset ID	Identifier for individual dataset source in the COSORE database (matching Dataset ID in sheet 'Field site metadata')
Chamber ID	Identifier for individual data chamber source
Rewetting time	Time at which rewetting events start in the field
Dryness (%)	Soil moisture reached at the end of the drying phase (m3 of water m-3 of soil, expressed as %)
Rewetting intensity (%)	Soil moisture increment at rewetting (m3 of water m-3 of soil, expressed as %)
Rewetting temperature (°C)	Mean temperature during the rewetting phase
Respiration rate (μmol C m−2 h−1)	Mean respiration rate over 48 hours after rewetting

## Sheet: Laboratory metadata and data
Data point unique ID	Data source ID	Reference	Longitude	Latitude	Land cover	Aridity index (-)	Soil sampling depth (cm)	Soil organic carbon content (g kg-1)	Incubation temperature (°C)	Dryness (%WHC)	Rewetting intensity (%WHC)	Drying length (days)	DRW cycle number	Respiration rate (µg C g-1 h-1)
1	1	Butterly, C. R., Bunemann, E. K., McNeill, A. M., Baldock, J. A., & Marschner, P. (2009). Carbon pulses but not phosphorus pulses are related to decreases in microbial biomass during repeated drying and rewetting of soils. Soil Biol Biochem, 41(7), 1406–1416. https://doi.org/10.1016/j.soilbio.2009.03.018	-35.08	147.3	C	0.3227	5	26.7	25	5.6	92.4	7	1	1.635
2	1	Butterly, C. R., Bunemann, E. K., McNeill, A. M., Baldock, J. A., & Marschner, P. (2009). Carbon pulses but not phosphorus pulses are related to decreases in microbial biomass during repeated drying and rewetting of soils. Soil Biol Biochem, 41(7), 1406–1416. https://doi.org/10.1016/j.soilbio.2009.03.018	-35.08	147.3	C	0.3227	5	26.7	25	5.6	92.4	7	2	1.137
3	1	Butterly, C. R., Bunemann, E. K., McNeill, A. M., Baldock, J. A., & Marschner, P. (2009). Carbon pulses but not phosphorus pulses are related to decreases in microbial biomass during repeated drying and rewetting of soils. Soil Biol Biochem, 41(7), 1406–1416. https://doi.org/10.1016/j.soilbio.2009.03.018	-35.08	147.3	C	0.3227	5	26.7	25	5.6	92.4	7	3	0.701
4	2	Chen, H., Jarosch, K. A., Mészáros, É., Frossard, E., Zhao, X., & Oberson, A. (2021). Repeated drying and rewetting differently affect abiotic and biotic soil phosphorus (P) dynamics in a sandy soil: A 33P soil incubation study. Soil Biology and Biochemistry, 153, 108079. https://doi.org/10.1016/j.soilbio.2020.108079	43.6	116.7	G	0.2647	20	15.9	20	10	40	5	1	0.778375
5	2	Chen, H., Jarosch, K. A., Mészáros, É., Frossard, E., Zhao, X., & Oberson, A. (2021). Repeated drying and rewetting differently affect abiotic and biotic soil phosphorus (P) dynamics in a sandy soil: A 33P soil incubation study. Soil Biology and Biochemistry, 153, 108079. https://doi.org/10.1016/j.soilbio.2020.108079	43.6	116.7	G	0.2647	20	15.9	20	10	40	5	2	0.555125
6	2	Chen, H., Jarosch, K. A., Mészáros, É., Frossard, E., Zhao, X., & Oberson, A. (2021). Repeated drying and rewetting differently affect abiotic and biotic soil phosphorus (P) dynamics in a sandy soil: A 33P soil incubation study. Soil Biology and Biochemistry, 153, 108079. https://doi.org/10.1016/j.soilbio.2020.108079	43.6	116.7	G	0.2647	20	15.9	20	10	40	5	3	0.307042
7	3	Chen, K., Huo, T., Zhang, Y., Guo, T., & Liang, J. (2023). Response of soil organic carbon decomposition to intensified water variability co-determined by the microbial community and aggregate changes in a temperate grassland soil of northern China. Soil Biology and Biochemistry, 176, 108875. https://doi.org/10.1016/j.soilbio.2022.108875	49.3	119.9	G	0.3603	10	42	15	81	43	9	1	1.12788
8	3	Chen, K., Huo, T., Zhang, Y., Guo, T., & Liang, J. (2023). Response of soil organic carbon decomposition to intensified water variability co-determined by the microbial community and aggregate changes in a temperate grassland soil of northern China. Soil Biology and Biochemistry, 176, 108875. https://doi.org/10.1016/j.soilbio.2022.108875	49.3	119.9	G	0.3603	10	42	15	81	43	9	2	0.805
9	3	Chen, K., Huo, T., Zhang, Y., Guo, T., & Liang, J. (2023). Response of soil organic carbon decomposition to intensified water variability co-determined by the microbial community and aggregate changes in a temperate grassland soil of northern China. Soil Biology and Biochemistry, 176, 108875. https://doi.org/10.1016/j.soilbio.2022.108875	49.3	119.9	G	0.3603	10	42	15	81	43	9	3	0.63525
10	3	Chen, K., Huo, T., Zhang, Y., Guo, T., & Liang, J. (2023). Response of soil organic carbon decomposition to intensified water variability co-determined by the microbial community and aggregate changes in a temperate grassland soil of northern China. Soil Biology and Biochemistry, 176, 108875. https://doi.org/10.1016/j.soilbio.2022.108875	49.3	119.9	G	0.3603	10	42	15	81	43	9	4	0.763875
11	3	Chen, K., Huo, T., Zhang, Y., Guo, T., & Liang, J. (2023). Response of soil organic carbon decomposition to intensified water variability co-determined by the microbial community and aggregate changes in a temperate grassland soil of northern China. Soil Biology and Biochemistry, 176, 108875. https://doi.org/10.1016/j.soilbio.2022.108875	49.3	119.9	G	0.3603	10	42	15	81	43	9	5	0.678125
12	3	Chen, K., Huo, T., Zhang, Y., Guo, T., & Liang, J. (2023). Response of soil organic carbon decomposition to intensified water variability co-determined by the microbial community and aggregate changes in a temperate grassland soil of northern China. Soil Biology and Biochemistry, 176, 108875. https://doi.org/10.1016/j.soilbio.2022.108875	49.3	119.9	G	0.3603	10	42	15	81	43	9	6	0.721
13	3	Chen, K., Huo, T., Zhang, Y., Guo, T., & Liang, J. (2023). Response of soil organic carbon decomposition to intensified water variability co-determined by the microbial community and aggregate changes in a temperate grassland soil of northern China. Soil Biology and Biochemistry, 176, 108875. https://doi.org/10.1016/j.soilbio.2022.108875	49.3	119.9	G	0.3603	10	42	15	81	43	9	7	0.93275
14	3	Chen, K., Huo, T., Zhang, Y., Guo, T., & Liang, J. (2023). Response of soil organic carbon decomposition to intensified water variability co-determined by the microbial community and aggregate changes in a temperate grassland soil of northern China. Soil Biology and Biochemistry, 176, 108875. https://doi.org/10.1016/j.soilbio.2022.108875	49.3	119.9	G	0.3603	10	42	15	57	88	13	1	0.847875
15	3	Chen, K., Huo, T., Zhang, Y., Guo, T., & Liang, J. (2023). Response of soil organic carbon decomposition to intensified water variability co-determined by the microbial community and aggregate changes in a temperate grassland soil of northern China. Soil Biology and Biochemistry, 176, 108875. https://doi.org/10.1016/j.soilbio.2022.108875	49.3	119.9	G	0.3603	10	42	15	57	88	13	2	1.44287
16	3	Chen, K., Huo, T., Zhang, Y., Guo, T., & Liang, J. (2023). Response of soil organic carbon decomposition to intensified water variability co-determined by the microbial community and aggregate changes in a temperate grassland soil of northern China. Soil Biology and Biochemistry, 176, 108875. https://doi.org/10.1016/j.soilbio.2022.108875	49.3	119.9	G	0.3603	10	42	15	57	88	13	3	1.33
17	3	Chen, K., Huo, T., Zhang, Y., Guo, T., & Liang, J. (2023). Response of soil organic carbon decomposition to intensified water variability co-determined by the microbial community and aggregate changes in a temperate grassland soil of northern China. Soil Biology and Biochemistry, 176, 108875. https://doi.org/10.1016/j.soilbio.2022.108875	49.3	119.9	G	0.3603	10	42	15	57	88	13	4	2.12275
18	3	Chen, K., Huo, T., Zhang, Y., Guo, T., & Liang, J. (2023). Response of soil organic carbon decomposition to intensified water variability co-determined by the microbial community and aggregate changes in a temperate grassland soil of northern China. Soil Biology and Biochemistry, 176, 108875. https://doi.org/10.1016/j.soilbio.2022.108875	49.3	119.9	G	0.3603	10	42	15	57	88	13	5	1.01063
19	3	Chen, K., Huo, T., Zhang, Y., Guo, T., & Liang, J. (2023). Response of soil organic carbon decomposition to intensified water variability co-determined by the microbial community and aggregate changes in a temperate grassland soil of northern China. Soil Biology and Biochemistry, 176, 108875. https://doi.org/10.1016/j.soilbio.2022.108875	49.3	119.9	G	0.3603	10	42	15	43	31	8	1	0.294
20	3	Chen, K., Huo, T., Zhang, Y., Guo, T., & Liang, J. (2023). Response of soil organic carbon decomposition to intensified water variability co-determined by the microbial community and aggregate changes in a temperate grassland soil of northern China. Soil Biology and Biochemistry, 176, 108875. https://doi.org/10.1016/j.soilbio.2022.108875	49.3	119.9	G	0.3603	10	42	15	43	31	8	2	0.32025
21	3	Chen, K., Huo, T., Zhang, Y., Guo, T., & Liang, J. (2023). Response of soil organic carbon decomposition to intensified water variability co-determined by the microbial community and aggregate changes in a temperate grassland soil of northern China. Soil Biology and Biochemistry, 176, 108875. https://doi.org/10.1016/j.soilbio.2022.108875	49.3	119.9	G	0.3603	10	42	15	43	31	8	3	0.56
22	3	Chen, K., Huo, T., Zhang, Y., Guo, T., & Liang, J. (2023). Response of soil organic carbon decomposition to intensified water variability co-determined by the microbial community and aggregate changes in a temperate grassland soil of northern China. Soil Biology and Biochemistry, 176, 108875. https://doi.org/10.1016/j.soilbio.2022.108875	49.3	119.9	G	0.3603	10	42	15	43	31	8	4	0.480375
23	3	Chen, K., Huo, T., Zhang, Y., Guo, T., & Liang, J. (2023). Response of soil organic carbon decomposition to intensified water variability co-determined by the microbial community and aggregate changes in a temperate grassland soil of northern China. Soil Biology and Biochemistry, 176, 108875. https://doi.org/10.1016/j.soilbio.2022.108875	49.3	119.9	G	0.3603	10	42	15	43	31	8	5	0.480375
24	3	Chen, K., Huo, T., Zhang, Y., Guo, T., & Liang, J. (2023). Response of soil organic carbon decomposition to intensified water variability co-determined by the microbial community and aggregate changes in a temperate grassland soil of northern China. Soil Biology and Biochemistry, 176, 108875. https://doi.org/10.1016/j.soilbio.2022.108875	49.3	119.9	G	0.3603	10	42	15	43	31	8	6	0.77525
25	3	Chen, K., Huo, T., Zhang, Y., Guo, T., & Liang, J. (2023). Response of soil organic carbon decomposition to intensified water variability co-determined by the microbial community and aggregate changes in a temperate grassland soil of northern China. Soil Biology and Biochemistry, 176, 108875. https://doi.org/10.1016/j.soilbio.2022.108875	49.3	119.9	G	0.3603	10	42	15	43	31	8	7	0.587125
26	3	Chen, K., Huo, T., Zhang, Y., Guo, T., & Liang, J. (2023). Response of soil organic carbon decomposition to intensified water variability co-determined by the microbial community and aggregate changes in a temperate grassland soil of northern China. Soil Biology and Biochemistry, 176, 108875. https://doi.org/10.1016/j.soilbio.2022.108875	49.3	119.9	G	0.3603	10	42	15	43	31	8	7	0.319375
27	3	Chen, K., Huo, T., Zhang, Y., Guo, T., & Liang, J. (2023). Response of soil organic carbon decomposition to intensified water variability co-determined by the microbial community and aggregate changes in a temperate grassland soil of northern China. Soil Biology and Biochemistry, 176, 108875. https://doi.org/10.1016/j.soilbio.2022.108875	49.3	119.9	G	0.3603	10	42	15	29	59	13	1	0.67025
28	3	Chen, K., Huo, T., Zhang, Y., Guo, T., & Liang, J. (2023). Response of soil organic carbon decomposition to intensified water variability co-determined by the microbial community and aggregate changes in a temperate grassland soil of northern China. Soil Biology and Biochemistry, 176, 108875. https://doi.org/10.1016/j.soilbio.2022.108875	49.3	119.9	G	0.3603	10	42	15	29	59	13	2	0.828625
29	3	Chen, K., Huo, T., Zhang, Y., Guo, T., & Liang, J. (2023). Response of soil organic carbon decomposition to intensified water variability co-determined by the microbial community and aggregate changes in a temperate grassland soil of northern China. Soil Biology and Biochemistry, 176, 108875. https://doi.org/10.1016/j.soilbio.2022.108875	49.3	119.9	G	0.3603	10	42	15	29	59	13	3	1.52425
30	3	Chen, K., Huo, T., Zhang, Y., Guo, T., & Liang, J. (2023). Response of soil organic carbon decomposition to intensified water variability co-determined by the microbial community and aggregate changes in a temperate grassland soil of northern China. Soil Biology and Biochemistry, 176, 108875. https://doi.org/10.1016/j.soilbio.2022.108875	49.3	119.9	G	0.3603	10	42	15	29	59	13	4	0.506625
31	3	Chen, K., Huo, T., Zhang, Y., Guo, T., & Liang, J. (2023). Response of soil organic carbon decomposition to intensified water variability co-determined by the microbial community and aggregate changes in a temperate grassland soil of northern China. Soil Biology and Biochemistry, 176, 108875. https://doi.org/10.1016/j.soilbio.2022.108875	49.3	119.9	G	0.3603	10	42	15	29	59	13	5	1.2285
32	4	de Nijs, E. A., Hicks, L. C., Leizeaga, A., Tietema, A., & Rousk, J. (2018). Soil microbial moisture dependences and responses to drying–rewetting: The legacy of 18 years drought. Global Change Biology, 25(3), 1005–1015.	52.4	5.95	G	1.0294	8	420	16	2.15	47.85	3	1	9.4621
33	4	de Nijs, E. A., Hicks, L. C., Leizeaga, A., Tietema, A., & Rousk, J. (2018). Soil microbial moisture dependences and responses to drying–rewetting: The legacy of 18 years drought. Global Change Biology, 25(3), 1005–1015.	52.4	5.95	G	1.0294	8	420	16	2.15	47.85	3	2	7.18407
34	4	de Nijs, E. A., Hicks, L. C., Leizeaga, A., Tietema, A., & Rousk, J. (2018). Soil microbial moisture dependences and responses to drying–rewetting: The legacy of 18 years drought. Global Change Biology, 25(3), 1005–1015.	52.4	5.95	G	1.0294	8	420	16	2.15	47.85	3	3	4.51983
35	4	de Nijs, E. A., Hicks, L. C., Leizeaga, A., Tietema, A., & Rousk, J. (2018). Soil microbial moisture dependences and responses to drying–rewetting: The legacy of 18 years drought. Global Change Biology, 25(3), 1005–1015.	52.4	5.95	G	1.0294	8	43	16	2.15	47.85	3	1	9.02405
36	4	de Nijs, E. A., Hicks, L. C., Leizeaga, A., Tietema, A., & Rousk, J. (2018). Soil microbial moisture dependences and responses to drying–rewetting: The legacy of 18 years drought. Global Change Biology, 25(3), 1005–1015.	52.4	5.95	G	1.0294	8	43	16	2.15	47.85	3	2	6.51659
37	4	de Nijs, E. A., Hicks, L. C., Leizeaga, A., Tietema, A., & Rousk, J. (2018). Soil microbial moisture dependences and responses to drying–rewetting: The legacy of 18 years drought. Global Change Biology, 25(3), 1005–1015.	52.4	5.95	G	1.0294	8	43	16	2.15	47.85	3	3	4.17312
38	5	Denef, K., Six, J., Bossuyt, H., Frey, S. D., Elliott, E. T., Merckx, R., & Paustian, K. (2001). Influence of dry–wet cycles on the interrelationship between aggregate, particulate organic matter, and microbial community dynamics. Soil Biology and Biochemistry, 33(12), 1599–1611. https://doi.org/10.1016/S0038-0717(01)00076-1	40.15	-103.15	C	0.2267	20	6.19	25	8.33333	91.6667	14	1	0.5128
39	5	Denef, K., Six, J., Bossuyt, H., Frey, S. D., Elliott, E. T., Merckx, R., & Paustian, K. (2001). Influence of dry–wet cycles on the interrelationship between aggregate, particulate organic matter, and microbial community dynamics. Soil Biology and Biochemistry, 33(12), 1599–1611. https://doi.org/10.1016/S0038-0717(01)00076-1	40.15	-103.15	C	0.2267	20	6.19	25	8.33333	91.6667	14	2	0.23253
40	5	Denef, K., Six, J., Bossuyt, H., Frey, S. D., Elliott, E. T., Merckx, R., & Paustian, K. (2001). Influence of dry–wet cycles on the interrelationship between aggregate, particulate organic matter, and microbial community dynamics. Soil Biology and Biochemistry, 33(12), 1599–1611. https://doi.org/10.1016/S0038-0717(01)00076-1	40.15	-103.15	C	0.2267	20	6.19	25	8.33333	91.6667	14	3	0.12872
41	5	Denef, K., Six, J., Bossuyt, H., Frey, S. D., Elliott, E. T., Merckx, R., & Paustian, K. (2001). Influence of dry–wet cycles on the interrelationship between aggregate, particulate organic matter, and microbial community dynamics. Soil Biology and Biochemistry, 33(12), 1599–1611. https://doi.org/10.1016/S0038-0717(01)00076-1	40.15	-103.15	C	0.2267	20	6.19	25	8.33333	91.6667	14	4	0.10173
42	6	Evans, S. E., & Wallenstein, M. D. (2012). Soil microbial community response to drying and rewetting stress: Does historical precipitation regime matter? Biogeochemistry, 109(1), 101–116. https://doi.org/10.1007/s10533-011-9638-3	39.0833	-96.5833	C	0.5763	10	35	25	28.8956	71.1044	23	1	1.7
43	6	Evans, S. E., & Wallenstein, M. D. (2012). Soil microbial community response to drying and rewetting stress: Does historical precipitation regime matter? Biogeochemistry, 109(1), 101–116. https://doi.org/10.1007/s10533-011-9638-3	39.0833	-96.5833	C	0.5763	10	35	25	27.6	72.4	23	2	1.4625
44	6	Evans, S. E., & Wallenstein, M. D. (2012). Soil microbial community response to drying and rewetting stress: Does historical precipitation regime matter? Biogeochemistry, 109(1), 101–116. https://doi.org/10.1007/s10533-011-9638-3	39.0833	-96.5833	C	0.5763	10	35	25	31.0111	68.9889	23	3	0.7
45	6	Evans, S. E., & Wallenstein, M. D. (2012). Soil microbial community response to drying and rewetting stress: Does historical precipitation regime matter? Biogeochemistry, 109(1), 101–116. https://doi.org/10.1007/s10533-011-9638-3	39.0833	-96.5833	C	0.5763	10	35	25	29.7178	70.2822	23	4	0.4125
46	6	Evans, S. E., & Wallenstein, M. D. (2012). Soil microbial community response to drying and rewetting stress: Does historical precipitation regime matter? Biogeochemistry, 109(1), 101–116. https://doi.org/10.1007/s10533-011-9638-3	39.0833	-96.5833	C	0.5763	10	35	25	28.7333	71.2667	23	1	1.8625
47	6	Evans, S. E., & Wallenstein, M. D. (2012). Soil microbial community response to drying and rewetting stress: Does historical precipitation regime matter? Biogeochemistry, 109(1), 101–116. https://doi.org/10.1007/s10533-011-9638-3	39.0833	-96.5833	C	0.5763	10	35	25	24.6044	75.3956	23	2	1.1375
48	6	Evans, S. E., & Wallenstein, M. D. (2012). Soil microbial community response to drying and rewetting stress: Does historical precipitation regime matter? Biogeochemistry, 109(1), 101–116. https://doi.org/10.1007/s10533-011-9638-3	39.0833	-96.5833	C	0.5763	10	35	25	28.9667	71.0333	23	3	0.6375
49	6	Evans, S. E., & Wallenstein, M. D. (2012). Soil microbial community response to drying and rewetting stress: Does historical precipitation regime matter? Biogeochemistry, 109(1), 101–116. https://doi.org/10.1007/s10533-011-9638-3	39.0833	-96.5833	C	0.5763	10	35	25	25.7778	74.2222	23	4	0.2875
50	7	Guo, X. B., Drury, C. F., Yang, X. M., Reynolds, W. D., & Zhang, R. D. (2012). Impacts of Wet-Dry Cycles and a Range of Constant Water Contents on Carbon Mineralization in Soils under Three Cropping Treatments. SOIL SCIENCE SOCIETY OF AMERICA JOURNAL, 76(2), 485–493. https://doi.org/10.2136/sssaj2011.0315	42.22	-82.73	C	0.8085	10	23.2	25	42	84	10	1	1.17179
51	7	Guo, X. B., Drury, C. F., Yang, X. M., Reynolds, W. D., & Zhang, R. D. (2012). Impacts of Wet-Dry Cycles and a Range of Constant Water Contents on Carbon Mineralization in Soils under Three Cropping Treatments. SOIL SCIENCE SOCIETY OF AMERICA JOURNAL, 76(2), 485–493. https://doi.org/10.2136/sssaj2011.0315	42.22	-82.73	C	0.8085	10	23.2	25	42	84	10	2	0.965708
52	7	Guo, X. B., Drury, C. F., Yang, X. M., Reynolds, W. D., & Zhang, R. D. (2012). Impacts of Wet-Dry Cycles and a Range of Constant Water Contents on Carbon Mineralization in Soils under Three Cropping Treatments. SOIL SCIENCE SOCIETY OF AMERICA JOURNAL, 76(2), 485–493. https://doi.org/10.2136/sssaj2011.0315	42.22	-82.73	C	0.8085	10	23.2	25	42	84	10	3	0.719333
53	7	Guo, X. B., Drury, C. F., Yang, X. M., Reynolds, W. D., & Zhang, R. D. (2012). Impacts of Wet-Dry Cycles and a Range of Constant Water Contents on Carbon Mineralization in Soils under Three Cropping Treatments. SOIL SCIENCE SOCIETY OF AMERICA JOURNAL, 76(2), 485–493. https://doi.org/10.2136/sssaj2011.0315	42.22	-82.73	C	0.8085	10	23.2	25	42	84	10	4	0.659458
54	7	Guo, X. B., Drury, C. F., Yang, X. M., Reynolds, W. D., & Zhang, R. D. (2012). Impacts of Wet-Dry Cycles and a Range of Constant Water Contents on Carbon Mineralization in Soils under Three Cropping Treatments. SOIL SCIENCE SOCIETY OF AMERICA JOURNAL, 76(2), 485–493. https://doi.org/10.2136/sssaj2011.0315	42.22	-82.73	C	0.8085	10	23.5	25	42	84	10	1	1.16225
55	7	Guo, X. B., Drury, C. F., Yang, X. M., Reynolds, W. D., & Zhang, R. D. (2012). Impacts of Wet-Dry Cycles and a Range of Constant Water Contents on Carbon Mineralization in Soils under Three Cropping Treatments. SOIL SCIENCE SOCIETY OF AMERICA JOURNAL, 76(2), 485–493. https://doi.org/10.2136/sssaj2011.0315	42.22	-82.73	C	0.8085	10	23.5	25	42	84	10	2	1.2565
56	7	Guo, X. B., Drury, C. F., Yang, X. M., Reynolds, W. D., & Zhang, R. D. (2012). Impacts of Wet-Dry Cycles and a Range of Constant Water Contents on Carbon Mineralization in Soils under Three Cropping Treatments. SOIL SCIENCE SOCIETY OF AMERICA JOURNAL, 76(2), 485–493. https://doi.org/10.2136/sssaj2011.0315	42.22	-82.73	C	0.8085	10	23.5	25	42	84	10	3	0.542917
57	7	Guo, X. B., Drury, C. F., Yang, X. M., Reynolds, W. D., & Zhang, R. D. (2012). Impacts of Wet-Dry Cycles and a Range of Constant Water Contents on Carbon Mineralization in Soils under Three Cropping Treatments. SOIL SCIENCE SOCIETY OF AMERICA JOURNAL, 76(2), 485–493. https://doi.org/10.2136/sssaj2011.0315	42.22	-82.73	C	0.8085	10	23.5	25	42	84	10	4	0.750083
58	7	Guo, X. B., Drury, C. F., Yang, X. M., Reynolds, W. D., & Zhang, R. D. (2012). Impacts of Wet-Dry Cycles and a Range of Constant Water Contents on Carbon Mineralization in Soils under Three Cropping Treatments. SOIL SCIENCE SOCIETY OF AMERICA JOURNAL, 76(2), 485–493. https://doi.org/10.2136/sssaj2011.0315	42.22	-82.73	C	0.8085	10	24.1	25	42	84	10	1	0.723667
59	7	Guo, X. B., Drury, C. F., Yang, X. M., Reynolds, W. D., & Zhang, R. D. (2012). Impacts of Wet-Dry Cycles and a Range of Constant Water Contents on Carbon Mineralization in Soils under Three Cropping Treatments. SOIL SCIENCE SOCIETY OF AMERICA JOURNAL, 76(2), 485–493. https://doi.org/10.2136/sssaj2011.0315	42.22	-82.73	C	0.8085	10	24.1	25	42	84	10	2	0.679708
60	7	Guo, X. B., Drury, C. F., Yang, X. M., Reynolds, W. D., & Zhang, R. D. (2012). Impacts of Wet-Dry Cycles and a Range of Constant Water Contents on Carbon Mineralization in Soils under Three Cropping Treatments. SOIL SCIENCE SOCIETY OF AMERICA JOURNAL, 76(2), 485–493. https://doi.org/10.2136/sssaj2011.0315	42.22	-82.73	C	0.8085	10	24.1	25	42	84	10	3	0.68125
61	7	Guo, X. B., Drury, C. F., Yang, X. M., Reynolds, W. D., & Zhang, R. D. (2012). Impacts of Wet-Dry Cycles and a Range of Constant Water Contents on Carbon Mineralization in Soils under Three Cropping Treatments. SOIL SCIENCE SOCIETY OF AMERICA JOURNAL, 76(2), 485–493. https://doi.org/10.2136/sssaj2011.0315	42.22	-82.73	C	0.8085	10	24.1	25	42	84	10	4	0.669042
62	8	Hicks, L. C., Lin, S., & Rousk, J. (2022). Microbial resilience to drying-rewetting is partly driven by selection for quick colonizers. Soil Biology and Biochemistry, 167, 108581. https://doi.org/10.1016/j.soilbio.2022.108581	54.233	-4	F	0	10	53	18	3.85	46.15	2	1	1.0993
63	8	Hicks, L. C., Lin, S., & Rousk, J. (2022). Microbial resilience to drying-rewetting is partly driven by selection for quick colonizers. Soil Biology and Biochemistry, 167, 108581. https://doi.org/10.1016/j.soilbio.2022.108581	54.233	-4	F	0	10	53	18	3.872	46.128	2	2	1.29095
64	8	Hicks, L. C., Lin, S., & Rousk, J. (2022). Microbial resilience to drying-rewetting is partly driven by selection for quick colonizers. Soil Biology and Biochemistry, 167, 108581. https://doi.org/10.1016/j.soilbio.2022.108581	54.233	-4	F	0	10	53	18	3.894	46.106	2	3	0.826002
65	8	Hicks, L. C., Lin, S., & Rousk, J. (2022). Microbial resilience to drying-rewetting is partly driven by selection for quick colonizers. Soil Biology and Biochemistry, 167, 108581. https://doi.org/10.1016/j.soilbio.2022.108581	54.233	-4	F	0	10	53	18	3.858	46.142	2	4	0.569237
66	9	Jiao, P., Xiao, H., Li, Z., Yang, L., & Zheng, P. (2022). Drying-rewetting cycles reduce bacterial diversity and carbon loss in soil on the Loess Plateau of China. PEDOSPHERE. https://doi.org/10.1016/j.pedsph.2022.09.002	36.81	109.24	C	0.3488	15	4.7	25	10	50	5	1	0.115073
67	9	Jiao, P., Xiao, H., Li, Z., Yang, L., & Zheng, P. (2022). Drying-rewetting cycles reduce bacterial diversity and carbon loss in soil on the Loess Plateau of China. PEDOSPHERE. https://doi.org/10.1016/j.pedsph.2022.09.002	36.81	109.24	C	0.3488	15	4.7	25	10	50	5	2	0.0660854
68	9	Jiao, P., Xiao, H., Li, Z., Yang, L., & Zheng, P. (2022). Drying-rewetting cycles reduce bacterial diversity and carbon loss in soil on the Loess Plateau of China. PEDOSPHERE. https://doi.org/10.1016/j.pedsph.2022.09.002	36.81	109.24	C	0.3488	15	4.7	25	10	50	5	3	0.0452304
69	9	Jiao, P., Xiao, H., Li, Z., Yang, L., & Zheng, P. (2022). Drying-rewetting cycles reduce bacterial diversity and carbon loss in soil on the Loess Plateau of China. PEDOSPHERE. https://doi.org/10.1016/j.pedsph.2022.09.002	36.81	109.24	C	0.3488	15	4.7	25	10	50	5	4	0.0405088
70	9	Jiao, P., Xiao, H., Li, Z., Yang, L., & Zheng, P. (2022). Drying-rewetting cycles reduce bacterial diversity and carbon loss in soil on the Loess Plateau of China. PEDOSPHERE. https://doi.org/10.1016/j.pedsph.2022.09.002	36.81	109.24	C	0.3488	15	4.7	25	10	80	5	1	0.0568892
71	9	Jiao, P., Xiao, H., Li, Z., Yang, L., & Zheng, P. (2022). Drying-rewetting cycles reduce bacterial diversity and carbon loss in soil on the Loess Plateau of China. PEDOSPHERE. https://doi.org/10.1016/j.pedsph.2022.09.002	36.81	109.24	C	0.3488	15	4.7	25	10	80	5	2	0.0444958
72	9	Jiao, P., Xiao, H., Li, Z., Yang, L., & Zheng, P. (2022). Drying-rewetting cycles reduce bacterial diversity and carbon loss in soil on the Loess Plateau of China. PEDOSPHERE. https://doi.org/10.1016/j.pedsph.2022.09.002	36.81	109.24	C	0.3488	15	4.7	25	10	80	5	3	0.0307533
73	9	Jiao, P., Xiao, H., Li, Z., Yang, L., & Zheng, P. (2022). Drying-rewetting cycles reduce bacterial diversity and carbon loss in soil on the Loess Plateau of China. PEDOSPHERE. https://doi.org/10.1016/j.pedsph.2022.09.002	36.81	109.24	C	0.3488	15	4.7	25	10	80	5	4	0.0325871
74	10	Li, J. T., Wang, J. J., Zeng, D. H., Zhao, S. Y., Huang, W. L., Sun, X. K., & Hu, Y. L. (2018). The influence of drought intensity on soil respiration during and after multiple drying-rewetting cycles. Soil Biol Biochem, 127, 82–89. https://doi.org/10.1016/j.soilbio.2018.09.018	42.97	122.35	F	0.3558	15	8.19	25	36	24	10	1	0.455204
75	10	Li, J. T., Wang, J. J., Zeng, D. H., Zhao, S. Y., Huang, W. L., Sun, X. K., & Hu, Y. L. (2018). The influence of drought intensity on soil respiration during and after multiple drying-rewetting cycles. Soil Biol Biochem, 127, 82–89. https://doi.org/10.1016/j.soilbio.2018.09.018	42.97	122.35	F	0.3558	15	8.19	25	36	24	10	2	0.413484
76	10	Li, J. T., Wang, J. J., Zeng, D. H., Zhao, S. Y., Huang, W. L., Sun, X. K., & Hu, Y. L. (2018). The influence of drought intensity on soil respiration during and after multiple drying-rewetting cycles. Soil Biol Biochem, 127, 82–89. https://doi.org/10.1016/j.soilbio.2018.09.018	42.97	122.35	F	0.3558	15	8.19	25	36	24	10	3	0.400495
77	10	Li, J. T., Wang, J. J., Zeng, D. H., Zhao, S. Y., Huang, W. L., Sun, X. K., & Hu, Y. L. (2018). The influence of drought intensity on soil respiration during and after multiple drying-rewetting cycles. Soil Biol Biochem, 127, 82–89. https://doi.org/10.1016/j.soilbio.2018.09.018	42.97	122.35	F	0.3558	15	8.19	25	36	24	10	4	0.362103
78	10	Li, J. T., Wang, J. J., Zeng, D. H., Zhao, S. Y., Huang, W. L., Sun, X. K., & Hu, Y. L. (2018). The influence of drought intensity on soil respiration during and after multiple drying-rewetting cycles. Soil Biol Biochem, 127, 82–89. https://doi.org/10.1016/j.soilbio.2018.09.018	42.97	122.35	F	0.3558	15	8.19	25	24	36	20	1	0.579744
79	10	Li, J. T., Wang, J. J., Zeng, D. H., Zhao, S. Y., Huang, W. L., Sun, X. K., & Hu, Y. L. (2018). The influence of drought intensity on soil respiration during and after multiple drying-rewetting cycles. Soil Biol Biochem, 127, 82–89. https://doi.org/10.1016/j.soilbio.2018.09.018	42.97	122.35	F	0.3558	15	8.19	25	24	36	20	2	0.421282
80	10	Li, J. T., Wang, J. J., Zeng, D. H., Zhao, S. Y., Huang, W. L., Sun, X. K., & Hu, Y. L. (2018). The influence of drought intensity on soil respiration during and after multiple drying-rewetting cycles. Soil Biol Biochem, 127, 82–89. https://doi.org/10.1016/j.soilbio.2018.09.018	42.97	122.35	F	0.3558	15	8.19	25	24	36	20	3	0.379042
81	10	Li, J. T., Wang, J. J., Zeng, D. H., Zhao, S. Y., Huang, W. L., Sun, X. K., & Hu, Y. L. (2018). The influence of drought intensity on soil respiration during and after multiple drying-rewetting cycles. Soil Biol Biochem, 127, 82–89. https://doi.org/10.1016/j.soilbio.2018.09.018	42.97	122.35	F	0.3558	15	8.19	25	24	36	20	4	0.357648
82	10	Li, J. T., Wang, J. J., Zeng, D. H., Zhao, S. Y., Huang, W. L., Sun, X. K., & Hu, Y. L. (2018). The influence of drought intensity on soil respiration during and after multiple drying-rewetting cycles. Soil Biol Biochem, 127, 82–89. https://doi.org/10.1016/j.soilbio.2018.09.018	42.97	122.35	F	0.3558	15	5.27	25	18	42	10	1	0.226281
83	10	Li, J. T., Wang, J. J., Zeng, D. H., Zhao, S. Y., Huang, W. L., Sun, X. K., & Hu, Y. L. (2018). The influence of drought intensity on soil respiration during and after multiple drying-rewetting cycles. Soil Biol Biochem, 127, 82–89. https://doi.org/10.1016/j.soilbio.2018.09.018	42.97	122.35	F	0.3558	15	5.27	25	18	42	10	2	0.250627
84	10	Li, J. T., Wang, J. J., Zeng, D. H., Zhao, S. Y., Huang, W. L., Sun, X. K., & Hu, Y. L. (2018). The influence of drought intensity on soil respiration during and after multiple drying-rewetting cycles. Soil Biol Biochem, 127, 82–89. https://doi.org/10.1016/j.soilbio.2018.09.018	42.97	122.35	F	0.3558	15	5.27	25	18	42	10	3	0.295766
85	10	Li, J. T., Wang, J. J., Zeng, D. H., Zhao, S. Y., Huang, W. L., Sun, X. K., & Hu, Y. L. (2018). The influence of drought intensity on soil respiration during and after multiple drying-rewetting cycles. Soil Biol Biochem, 127, 82–89. https://doi.org/10.1016/j.soilbio.2018.09.018	42.97	122.35	F	0.3558	15	5.27	25	18	42	10	4	0.256428
86	10	Li, J. T., Wang, J. J., Zeng, D. H., Zhao, S. Y., Huang, W. L., Sun, X. K., & Hu, Y. L. (2018). The influence of drought intensity on soil respiration during and after multiple drying-rewetting cycles. Soil Biol Biochem, 127, 82–89. https://doi.org/10.1016/j.soilbio.2018.09.018	42.97	122.35	F	0.3558	15	5.27	25	8	52	20	1	0.283924
87	10	Li, J. T., Wang, J. J., Zeng, D. H., Zhao, S. Y., Huang, W. L., Sun, X. K., & Hu, Y. L. (2018). The influence of drought intensity on soil respiration during and after multiple drying-rewetting cycles. Soil Biol Biochem, 127, 82–89. https://doi.org/10.1016/j.soilbio.2018.09.018	42.97	122.35	F	0.3558	15	5.27	25	8	52	20	2	0.278313
88	10	Li, J. T., Wang, J. J., Zeng, D. H., Zhao, S. Y., Huang, W. L., Sun, X. K., & Hu, Y. L. (2018). The influence of drought intensity on soil respiration during and after multiple drying-rewetting cycles. Soil Biol Biochem, 127, 82–89. https://doi.org/10.1016/j.soilbio.2018.09.018	42.97	122.35	F	0.3558	15	5.27	25	8	52	20	3	0.259506
89	10	Li, J. T., Wang, J. J., Zeng, D. H., Zhao, S. Y., Huang, W. L., Sun, X. K., & Hu, Y. L. (2018). The influence of drought intensity on soil respiration during and after multiple drying-rewetting cycles. Soil Biol Biochem, 127, 82–89. https://doi.org/10.1016/j.soilbio.2018.09.018	42.97	122.35	F	0.3558	15	5.27	25	8	52	20	4	0.234342
90	11	Matthews, K. E., Facelli, J. M., & Cavagnaro, T. R. (2023). Response of soil microbial community structure, carbon and nitrogen cycling to drying and rewetting. Applied Soil Ecology, 192. https://doi.org/10.1016/j.apsoil.2023.105099	-34.62	138.8	C	0.2996	10	31.4	25	25	50	7	1	2.11153
91	11	Matthews, K. E., Facelli, J. M., & Cavagnaro, T. R. (2023). Response of soil microbial community structure, carbon and nitrogen cycling to drying and rewetting. Applied Soil Ecology, 192. https://doi.org/10.1016/j.apsoil.2023.105099	-34.62	138.8	C	0.2996	10	31.4	25	25	50	7	2	2.58288
92	11	Matthews, K. E., Facelli, J. M., & Cavagnaro, T. R. (2023). Response of soil microbial community structure, carbon and nitrogen cycling to drying and rewetting. Applied Soil Ecology, 192. https://doi.org/10.1016/j.apsoil.2023.105099	-34.62	138.8	C	0.2996	10	31.4	25	25	50	7	3	3.16215
93	11	Matthews, K. E., Facelli, J. M., & Cavagnaro, T. R. (2023). Response of soil microbial community structure, carbon and nitrogen cycling to drying and rewetting. Applied Soil Ecology, 192. https://doi.org/10.1016/j.apsoil.2023.105099	-34.62	138.8	C	0.2996	10	31.4	25	25	50	7	4	2.41849
94	11	Matthews, K. E., Facelli, J. M., & Cavagnaro, T. R. (2023). Response of soil microbial community structure, carbon and nitrogen cycling to drying and rewetting. Applied Soil Ecology, 192. https://doi.org/10.1016/j.apsoil.2023.105099	-34.8	138.9	C	0.4591	10	30.8	25	25	50	7	1	1.15
95	11	Matthews, K. E., Facelli, J. M., & Cavagnaro, T. R. (2023). Response of soil microbial community structure, carbon and nitrogen cycling to drying and rewetting. Applied Soil Ecology, 192. https://doi.org/10.1016/j.apsoil.2023.105099	-34.8	138.9	C	0.4591	10	30.8	25	25	50	7	2	1.74
96	11	Matthews, K. E., Facelli, J. M., & Cavagnaro, T. R. (2023). Response of soil microbial community structure, carbon and nitrogen cycling to drying and rewetting. Applied Soil Ecology, 192. https://doi.org/10.1016/j.apsoil.2023.105099	-34.8	138.9	C	0.4591	10	30.8	25	25	50	7	3	2.13
97	11	Matthews, K. E., Facelli, J. M., & Cavagnaro, T. R. (2023). Response of soil microbial community structure, carbon and nitrogen cycling to drying and rewetting. Applied Soil Ecology, 192. https://doi.org/10.1016/j.apsoil.2023.105099	-34.8	138.9	C	0.4591	10	30.8	25	25	50	7	4	1.32
98	11	Matthews, K. E., Facelli, J. M., & Cavagnaro, T. R. (2023). Response of soil microbial community structure, carbon and nitrogen cycling to drying and rewetting. Applied Soil Ecology, 192. https://doi.org/10.1016/j.apsoil.2023.105099	-34.6	138.8	C	0.2885	10	14.7	25	25	50	7	1	3.68
99	11	Matthews, K. E., Facelli, J. M., & Cavagnaro, T. R. (2023). Response of soil microbial community structure, carbon and nitrogen cycling to drying and rewetting. Applied Soil Ecology, 192. https://doi.org/10.1016/j.apsoil.2023.105099	-34.6	138.8	C	0.2885	10	14.7	25	25	50	7	2	2.95
100	11	Matthews, K. E., Facelli, J. M., & Cavagnaro, T. R. (2023). Response of soil microbial community structure, carbon and nitrogen cycling to drying and rewetting. Applied Soil Ecology, 192. https://doi.org/10.1016/j.apsoil.2023.105099	-34.6	138.8	C	0.2885	10	14.7	25	25	50	7	3	2.98
101	11	Matthews, K. E., Facelli, J. M., & Cavagnaro, T. R. (2023). Response of soil microbial community structure, carbon and nitrogen cycling to drying and rewetting. Applied Soil Ecology, 192. https://doi.org/10.1016/j.apsoil.2023.105099	-34.6	138.8	C	0.2885	10	14.7	25	25	50	7	4	2.25
102	12	Mikha, M. M., Rice, C. W., & Milliken, G. A. (2005). Carbon and nitrogen mineralization as affected by drying and wetting cycles. Soil Biol Biochem, 37(2), 339–347. https://doi.org/10.1016/j.soilbio.2004.08.003	39.21	-96.59	C	0.5691	10	16.2	25	42	58	10	1	0.617716
103	12	Mikha, M. M., Rice, C. W., & Milliken, G. A. (2005). Carbon and nitrogen mineralization as affected by drying and wetting cycles. Soil Biol Biochem, 37(2), 339–347. https://doi.org/10.1016/j.soilbio.2004.08.003	39.21	-96.59	C	0.5691	10	16.2	25	42	58	10	2	0.466064
104	12	Mikha, M. M., Rice, C. W., & Milliken, G. A. (2005). Carbon and nitrogen mineralization as affected by drying and wetting cycles. Soil Biol Biochem, 37(2), 339–347. https://doi.org/10.1016/j.soilbio.2004.08.003	39.21	-96.59	C	0.5691	10	16.2	25	42	58	10	3	0.349905
105	12	Mikha, M. M., Rice, C. W., & Milliken, G. A. (2005). Carbon and nitrogen mineralization as affected by drying and wetting cycles. Soil Biol Biochem, 37(2), 339–347. https://doi.org/10.1016/j.soilbio.2004.08.003	39.21	-96.59	C	0.5691	10	16.2	25	42	58	10	4	0.280726
106	13	Miller, A., Schimel, J., Meixner, T., Sickman, J., & Melack, J. (2005). Episodic rewetting enhances carbon and nitrogen release from chaparral soils. Soil Biology and Biochemistry, 37(12), 2195–2204. https://doi.org/10.1016/j.soilbio.2005.03.021	36.57	-118.73	F	0.4716	10	23	20	4	56	22	1	3.6536
107	13	Miller, A., Schimel, J., Meixner, T., Sickman, J., & Melack, J. (2005). Episodic rewetting enhances carbon and nitrogen release from chaparral soils. Soil Biology and Biochemistry, 37(12), 2195–2204. https://doi.org/10.1016/j.soilbio.2005.03.021	36.57	-118.73	F	0.4716	10	23	20	4	56	28	2	2.68192
108	13	Miller, A., Schimel, J., Meixner, T., Sickman, J., & Melack, J. (2005). Episodic rewetting enhances carbon and nitrogen release from chaparral soils. Soil Biology and Biochemistry, 37(12), 2195–2204. https://doi.org/10.1016/j.soilbio.2005.03.021	36.57	-118.73	F	0.4716	10	23	20	4	56	25	3	3.03171
109	13	Miller, A., Schimel, J., Meixner, T., Sickman, J., & Melack, J. (2005). Episodic rewetting enhances carbon and nitrogen release from chaparral soils. Soil Biology and Biochemistry, 37(12), 2195–2204. https://doi.org/10.1016/j.soilbio.2005.03.021	36.57	-118.73	F	0.4716	10	23	20	4	56	27	4	2.24658
110	13	Miller, A., Schimel, J., Meixner, T., Sickman, J., & Melack, J. (2005). Episodic rewetting enhances carbon and nitrogen release from chaparral soils. Soil Biology and Biochemistry, 37(12), 2195–2204. https://doi.org/10.1016/j.soilbio.2005.03.021	36.57	-118.73	F	0.4716	10	23	20	4	56	6	1	1.80488
111	13	Miller, A., Schimel, J., Meixner, T., Sickman, J., & Melack, J. (2005). Episodic rewetting enhances carbon and nitrogen release from chaparral soils. Soil Biology and Biochemistry, 37(12), 2195–2204. https://doi.org/10.1016/j.soilbio.2005.03.021	36.57	-118.73	F	0.4716	10	23	20	4	56	16	2	1.4425
112	13	Miller, A., Schimel, J., Meixner, T., Sickman, J., & Melack, J. (2005). Episodic rewetting enhances carbon and nitrogen release from chaparral soils. Soil Biology and Biochemistry, 37(12), 2195–2204. https://doi.org/10.1016/j.soilbio.2005.03.021	36.57	-118.73	F	0.4716	10	23	20	4	56	13	3	1.54535
113	13	Miller, A., Schimel, J., Meixner, T., Sickman, J., & Melack, J. (2005). Episodic rewetting enhances carbon and nitrogen release from chaparral soils. Soil Biology and Biochemistry, 37(12), 2195–2204. https://doi.org/10.1016/j.soilbio.2005.03.021	36.57	-118.73	F	0.4716	10	23	20	4	56	13	4	1.19275
114	13	Miller, A., Schimel, J., Meixner, T., Sickman, J., & Melack, J. (2005). Episodic rewetting enhances carbon and nitrogen release from chaparral soils. Soil Biology and Biochemistry, 37(12), 2195–2204. https://doi.org/10.1016/j.soilbio.2005.03.021	36.57	-118.73	F	0.4716	10	23	20	4	56	13	5	1.26129
115	13	Miller, A., Schimel, J., Meixner, T., Sickman, J., & Melack, J. (2005). Episodic rewetting enhances carbon and nitrogen release from chaparral soils. Soil Biology and Biochemistry, 37(12), 2195–2204. https://doi.org/10.1016/j.soilbio.2005.03.021	36.57	-118.73	F	0.4716	10	23	20	4	56	13	6	1.12419
116	13	Miller, A., Schimel, J., Meixner, T., Sickman, J., & Melack, J. (2005). Episodic rewetting enhances carbon and nitrogen release from chaparral soils. Soil Biology and Biochemistry, 37(12), 2195–2204. https://doi.org/10.1016/j.soilbio.2005.03.021	36.57	-118.73	F	0.4716	10	23	20	4	56	15	7	2.07423
117	13	Miller, A., Schimel, J., Meixner, T., Sickman, J., & Melack, J. (2005). Episodic rewetting enhances carbon and nitrogen release from chaparral soils. Soil Biology and Biochemistry, 37(12), 2195–2204. https://doi.org/10.1016/j.soilbio.2005.03.021	36.57	-118.73	F	0.4716	10	23	20	4	56	8	8	1.08502
118	14	Muhr, J., Goldberg, S. D., Borken, W., & Gebauer, G. (2008). Repeated drying–rewetting cycles and their effects on the emission of CO2, N2O, NO, and CH4 in a forest soil. Journal of Plant Nutrition and Soil Science, 171(5), 719–728. https://doi.org/10.1002/jpln.200700302	50.1	11.87	F	1.3277	10	182	15	19	81	42	1	2.96093
119	14	Muhr, J., Goldberg, S. D., Borken, W., & Gebauer, G. (2008). Repeated drying–rewetting cycles and their effects on the emission of CO2, N2O, NO, and CH4 in a forest soil. Journal of Plant Nutrition and Soil Science, 171(5), 719–728. https://doi.org/10.1002/jpln.200700302	50.1	11.87	F	1.3277	10	182	15	19	81	42	2	2.17638
120	14	Muhr, J., Goldberg, S. D., Borken, W., & Gebauer, G. (2008). Repeated drying–rewetting cycles and their effects on the emission of CO2, N2O, NO, and CH4 in a forest soil. Journal of Plant Nutrition and Soil Science, 171(5), 719–728. https://doi.org/10.1002/jpln.200700302	50.1	11.87	F	1.3277	10	182	15	19	81	42	3	1.63987
121	14	Muhr, J., Goldberg, S. D., Borken, W., & Gebauer, G. (2008). Repeated drying–rewetting cycles and their effects on the emission of CO2, N2O, NO, and CH4 in a forest soil. Journal of Plant Nutrition and Soil Science, 171(5), 719–728. https://doi.org/10.1002/jpln.200700302	50.1	11.87	F	1.3277	20	86	15	56	44	42	1	6.74017
122	14	Muhr, J., Goldberg, S. D., Borken, W., & Gebauer, G. (2008). Repeated drying–rewetting cycles and their effects on the emission of CO2, N2O, NO, and CH4 in a forest soil. Journal of Plant Nutrition and Soil Science, 171(5), 719–728. https://doi.org/10.1002/jpln.200700302	50.1	11.87	F	1.3277	20	86	15	56	44	42	2	3.83147
123	14	Muhr, J., Goldberg, S. D., Borken, W., & Gebauer, G. (2008). Repeated drying–rewetting cycles and their effects on the emission of CO2, N2O, NO, and CH4 in a forest soil. Journal of Plant Nutrition and Soil Science, 171(5), 719–728. https://doi.org/10.1002/jpln.200700302	50.1	11.87	F	1.3277	20	86	15	56	44	42	3	1.68024
124	15	Nagano, H., Atarashi-Andoh, M., & Koarashi, J. (2019). Effect of dry-wet cycles on carbon dioxide release from two different volcanic ash soils in a Japanese temperate forest. Soil Science and Plant Nutrition, 65(5), 525–533. https://doi.org/10.1080/00380768.2019.1649976	36.9347	140.59	F	1.5832	20	89	20	5	75	20	1	1.61871
125	15	Nagano, H., Atarashi-Andoh, M., & Koarashi, J. (2019). Effect of dry-wet cycles on carbon dioxide release from two different volcanic ash soils in a Japanese temperate forest. Soil Science and Plant Nutrition, 65(5), 525–533. https://doi.org/10.1080/00380768.2019.1649976	36.9347	140.59	F	1.5832	20	89	20	5	75	20	2	1.11479
126	15	Nagano, H., Atarashi-Andoh, M., & Koarashi, J. (2019). Effect of dry-wet cycles on carbon dioxide release from two different volcanic ash soils in a Japanese temperate forest. Soil Science and Plant Nutrition, 65(5), 525–533. https://doi.org/10.1080/00380768.2019.1649976	36.9347	140.59	F	1.5832	20	89	20	5	75	20	3	0.945292
127	15	Nagano, H., Atarashi-Andoh, M., & Koarashi, J. (2019). Effect of dry-wet cycles on carbon dioxide release from two different volcanic ash soils in a Japanese temperate forest. Soil Science and Plant Nutrition, 65(5), 525–533. https://doi.org/10.1080/00380768.2019.1649976	36.9347	140.59	F	1.5832	20	89	20	5	75	20	4	0.842833
128	15	Nagano, H., Atarashi-Andoh, M., & Koarashi, J. (2019). Effect of dry-wet cycles on carbon dioxide release from two different volcanic ash soils in a Japanese temperate forest. Soil Science and Plant Nutrition, 65(5), 525–533. https://doi.org/10.1080/00380768.2019.1649976	36.9347	140.59	F	1.5832	20	89	20	5	75	20	5	0.846167
129	15	Nagano, H., Atarashi-Andoh, M., & Koarashi, J. (2019). Effect of dry-wet cycles on carbon dioxide release from two different volcanic ash soils in a Japanese temperate forest. Soil Science and Plant Nutrition, 65(5), 525–533. https://doi.org/10.1080/00380768.2019.1649976	36.9347	140.59	F	1.5832	20	134	20	5	75	20	1	2.75142
130	15	Nagano, H., Atarashi-Andoh, M., & Koarashi, J. (2019). Effect of dry-wet cycles on carbon dioxide release from two different volcanic ash soils in a Japanese temperate forest. Soil Science and Plant Nutrition, 65(5), 525–533. https://doi.org/10.1080/00380768.2019.1649976	36.9347	140.59	F	1.5832	20	134	20	5	75	20	2	1.92488
131	15	Nagano, H., Atarashi-Andoh, M., & Koarashi, J. (2019). Effect of dry-wet cycles on carbon dioxide release from two different volcanic ash soils in a Japanese temperate forest. Soil Science and Plant Nutrition, 65(5), 525–533. https://doi.org/10.1080/00380768.2019.1649976	36.9347	140.59	F	1.5832	20	134	20	5	75	20	3	1.56112
132	15	Nagano, H., Atarashi-Andoh, M., & Koarashi, J. (2019). Effect of dry-wet cycles on carbon dioxide release from two different volcanic ash soils in a Japanese temperate forest. Soil Science and Plant Nutrition, 65(5), 525–533. https://doi.org/10.1080/00380768.2019.1649976	36.9347	140.59	F	1.5832	20	134	20	5	75	20	4	1.30696
133	15	Nagano, H., Atarashi-Andoh, M., & Koarashi, J. (2019). Effect of dry-wet cycles on carbon dioxide release from two different volcanic ash soils in a Japanese temperate forest. Soil Science and Plant Nutrition, 65(5), 525–533. https://doi.org/10.1080/00380768.2019.1649976	36.9347	140.59	F	1.5832	20	134	20	5	75	20	5	1.28
134	16	Najera, F., Dippold, M. A., Boy, J., Seguel, O., Koester, M., Stock, S., Merino, C., Kuzyakov, Y., & Matus, F. (2020). Effects of drying/rewetting on soil aggregate dynamics and implications for organic matter turnover. BIOLOGY AND FERTILITY OF SOILS, 56(7), 893–905. https://doi.org/10.1007/s00374-020-01469-6	-37.78	-72.59	F	0.9823	5	106	5	20	80	3	1	0.0350208
135	16	Najera, F., Dippold, M. A., Boy, J., Seguel, O., Koester, M., Stock, S., Merino, C., Kuzyakov, Y., & Matus, F. (2020). Effects of drying/rewetting on soil aggregate dynamics and implications for organic matter turnover. BIOLOGY AND FERTILITY OF SOILS, 56(7), 893–905. https://doi.org/10.1007/s00374-020-01469-6	-37.78	-72.59	F	0.9823	5	106	5	20	80	3	2	0.0804792
136	16	Najera, F., Dippold, M. A., Boy, J., Seguel, O., Koester, M., Stock, S., Merino, C., Kuzyakov, Y., & Matus, F. (2020). Effects of drying/rewetting on soil aggregate dynamics and implications for organic matter turnover. BIOLOGY AND FERTILITY OF SOILS, 56(7), 893–905. https://doi.org/10.1007/s00374-020-01469-6	-37.78	-72.59	F	0.9823	5	106	5	20	80	3	3	0.0789583
137	16	Najera, F., Dippold, M. A., Boy, J., Seguel, O., Koester, M., Stock, S., Merino, C., Kuzyakov, Y., & Matus, F. (2020). Effects of drying/rewetting on soil aggregate dynamics and implications for organic matter turnover. BIOLOGY AND FERTILITY OF SOILS, 56(7), 893–905. https://doi.org/10.1007/s00374-020-01469-6	-37.78	-72.59	F	0.9823	5	106	5	20	80	3	4	0.046375
138	16	Najera, F., Dippold, M. A., Boy, J., Seguel, O., Koester, M., Stock, S., Merino, C., Kuzyakov, Y., & Matus, F. (2020). Effects of drying/rewetting on soil aggregate dynamics and implications for organic matter turnover. BIOLOGY AND FERTILITY OF SOILS, 56(7), 893–905. https://doi.org/10.1007/s00374-020-01469-6	-37.78	-72.59	F	0.9823	5	106	25	20	80	3	1	0.280229
139	16	Najera, F., Dippold, M. A., Boy, J., Seguel, O., Koester, M., Stock, S., Merino, C., Kuzyakov, Y., & Matus, F. (2020). Effects of drying/rewetting on soil aggregate dynamics and implications for organic matter turnover. BIOLOGY AND FERTILITY OF SOILS, 56(7), 893–905. https://doi.org/10.1007/s00374-020-01469-6	-37.78	-72.59	F	0.9823	5	106	25	20	80	3	2	0.161333
140	16	Najera, F., Dippold, M. A., Boy, J., Seguel, O., Koester, M., Stock, S., Merino, C., Kuzyakov, Y., & Matus, F. (2020). Effects of drying/rewetting on soil aggregate dynamics and implications for organic matter turnover. BIOLOGY AND FERTILITY OF SOILS, 56(7), 893–905. https://doi.org/10.1007/s00374-020-01469-6	-37.78	-72.59	F	0.9823	5	106	25	20	80	3	3	0.407625
141	16	Najera, F., Dippold, M. A., Boy, J., Seguel, O., Koester, M., Stock, S., Merino, C., Kuzyakov, Y., & Matus, F. (2020). Effects of drying/rewetting on soil aggregate dynamics and implications for organic matter turnover. BIOLOGY AND FERTILITY OF SOILS, 56(7), 893–905. https://doi.org/10.1007/s00374-020-01469-6	-37.78	-72.59	F	0.9823	5	106	25	20	80	3	4	0.322708
142	17	Ouyang, Y., & Li, X. (2020). Effect of repeated drying-rewetting cycles on soil extracellular enzyme activities and microbial community composition in arid and semi-arid ecosystems. European Journal of Soil Biology, 98, 103187. https://doi.org/10.1016/j.ejsobi.2020.103187	39.97	115.283	F	0.3692	10	21.286	20	7.52219	32.4778	13	1	1.23073
143	17	Ouyang, Y., & Li, X. (2020). Effect of repeated drying-rewetting cycles on soil extracellular enzyme activities and microbial community composition in arid and semi-arid ecosystems. European Journal of Soil Biology, 98, 103187. https://doi.org/10.1016/j.ejsobi.2020.103187	39.97	115.283	F	0.3692	10	21.286	20	7.52219	32.4778	13	2	1.18935
144	17	Ouyang, Y., & Li, X. (2020). Effect of repeated drying-rewetting cycles on soil extracellular enzyme activities and microbial community composition in arid and semi-arid ecosystems. European Journal of Soil Biology, 98, 103187. https://doi.org/10.1016/j.ejsobi.2020.103187	39.97	115.283	F	0.3692	10	21.286	20	7.52219	32.4778	13	3	0.623675
145	17	Ouyang, Y., & Li, X. (2020). Effect of repeated drying-rewetting cycles on soil extracellular enzyme activities and microbial community composition in arid and semi-arid ecosystems. European Journal of Soil Biology, 98, 103187. https://doi.org/10.1016/j.ejsobi.2020.103187	39.97	115.283	F	0.3692	10	21.286	20	7.52219	32.4778	13	4	0.496946
146	17	Ouyang, Y., & Li, X. (2020). Effect of repeated drying-rewetting cycles on soil extracellular enzyme activities and microbial community composition in arid and semi-arid ecosystems. European Journal of Soil Biology, 98, 103187. https://doi.org/10.1016/j.ejsobi.2020.103187	39.97	115.283	F	0.3692	10	21.286	20	7.52219	32.4778	13	5	0.463775
147	17	Ouyang, Y., & Li, X. (2020). Effect of repeated drying-rewetting cycles on soil extracellular enzyme activities and microbial community composition in arid and semi-arid ecosystems. European Journal of Soil Biology, 98, 103187. https://doi.org/10.1016/j.ejsobi.2020.103187	39.97	115.283	F	0.3692	10	21.286	20	7.52219	32.4778	8	1	1.4586
148	17	Ouyang, Y., & Li, X. (2020). Effect of repeated drying-rewetting cycles on soil extracellular enzyme activities and microbial community composition in arid and semi-arid ecosystems. European Journal of Soil Biology, 98, 103187. https://doi.org/10.1016/j.ejsobi.2020.103187	39.97	115.283	F	0.3692	10	21.286	20	7.52219	32.4778	8	2	1.31176
149	17	Ouyang, Y., & Li, X. (2020). Effect of repeated drying-rewetting cycles on soil extracellular enzyme activities and microbial community composition in arid and semi-arid ecosystems. European Journal of Soil Biology, 98, 103187. https://doi.org/10.1016/j.ejsobi.2020.103187	39.97	115.283	F	0.3692	10	21.286	20	7.52219	32.4778	8	3	1.10399
150	17	Ouyang, Y., & Li, X. (2020). Effect of repeated drying-rewetting cycles on soil extracellular enzyme activities and microbial community composition in arid and semi-arid ecosystems. European Journal of Soil Biology, 98, 103187. https://doi.org/10.1016/j.ejsobi.2020.103187	39.97	115.283	F	0.3692	10	21.286	20	7.52219	32.4778	8	4	0.717358
151	17	Ouyang, Y., & Li, X. (2020). Effect of repeated drying-rewetting cycles on soil extracellular enzyme activities and microbial community composition in arid and semi-arid ecosystems. European Journal of Soil Biology, 98, 103187. https://doi.org/10.1016/j.ejsobi.2020.103187	39.97	115.283	F	0.3692	10	21.286	20	7.52219	32.4778	8	5	0.497388
152	17	Ouyang, Y., & Li, X. (2020). Effect of repeated drying-rewetting cycles on soil extracellular enzyme activities and microbial community composition in arid and semi-arid ecosystems. European Journal of Soil Biology, 98, 103187. https://doi.org/10.1016/j.ejsobi.2020.103187	39.97	115.283	F	0.3692	10	21.286	20	7.52219	32.4778	8	6	0.415633
153	17	Ouyang, Y., & Li, X. (2020). Effect of repeated drying-rewetting cycles on soil extracellular enzyme activities and microbial community composition in arid and semi-arid ecosystems. European Journal of Soil Biology, 98, 103187. https://doi.org/10.1016/j.ejsobi.2020.103187	39.97	115.283	F	0.3692	10	21.286	20	7.52219	32.4778	8	7	0.358283
154	17	Ouyang, Y., & Li, X. (2020). Effect of repeated drying-rewetting cycles on soil extracellular enzyme activities and microbial community composition in arid and semi-arid ecosystems. European Journal of Soil Biology, 98, 103187. https://doi.org/10.1016/j.ejsobi.2020.103187	36.5	109.317	C	0.3772	10	9.686	20	14.7059	25.2941	13	1	0.828258
155	17	Ouyang, Y., & Li, X. (2020). Effect of repeated drying-rewetting cycles on soil extracellular enzyme activities and microbial community composition in arid and semi-arid ecosystems. European Journal of Soil Biology, 98, 103187. https://doi.org/10.1016/j.ejsobi.2020.103187	36.5	109.317	C	0.3772	10	9.686	20	14.7059	25.2941	13	2	0.786917
156	17	Ouyang, Y., & Li, X. (2020). Effect of repeated drying-rewetting cycles on soil extracellular enzyme activities and microbial community composition in arid and semi-arid ecosystems. European Journal of Soil Biology, 98, 103187. https://doi.org/10.1016/j.ejsobi.2020.103187	36.5	109.317	C	0.3772	10	9.686	20	14.7059	25.2941	13	3	0.566738
157	17	Ouyang, Y., & Li, X. (2020). Effect of repeated drying-rewetting cycles on soil extracellular enzyme activities and microbial community composition in arid and semi-arid ecosystems. European Journal of Soil Biology, 98, 103187. https://doi.org/10.1016/j.ejsobi.2020.103187	36.5	109.317	C	0.3772	10	9.686	20	14.7059	25.2941	13	4	0.45225
158	17	Ouyang, Y., & Li, X. (2020). Effect of repeated drying-rewetting cycles on soil extracellular enzyme activities and microbial community composition in arid and semi-arid ecosystems. European Journal of Soil Biology, 98, 103187. https://doi.org/10.1016/j.ejsobi.2020.103187	36.5	109.317	C	0.3772	10	9.686	20	14.7059	25.2941	13	5	0.37435
159	17	Ouyang, Y., & Li, X. (2020). Effect of repeated drying-rewetting cycles on soil extracellular enzyme activities and microbial community composition in arid and semi-arid ecosystems. European Journal of Soil Biology, 98, 103187. https://doi.org/10.1016/j.ejsobi.2020.103187	36.5	109.317	C	0.3772	10	9.686	20	14.7059	25.2941	8	1	0.804092
160	17	Ouyang, Y., & Li, X. (2020). Effect of repeated drying-rewetting cycles on soil extracellular enzyme activities and microbial community composition in arid and semi-arid ecosystems. European Journal of Soil Biology, 98, 103187. https://doi.org/10.1016/j.ejsobi.2020.103187	36.5	109.317	C	0.3772	10	9.686	20	14.7059	25.2941	8	2	0.742658
161	17	Ouyang, Y., & Li, X. (2020). Effect of repeated drying-rewetting cycles on soil extracellular enzyme activities and microbial community composition in arid and semi-arid ecosystems. European Journal of Soil Biology, 98, 103187. https://doi.org/10.1016/j.ejsobi.2020.103187	36.5	109.317	C	0.3772	10	9.686	20	14.7059	25.2941	8	3	0.58775
162	17	Ouyang, Y., & Li, X. (2020). Effect of repeated drying-rewetting cycles on soil extracellular enzyme activities and microbial community composition in arid and semi-arid ecosystems. European Journal of Soil Biology, 98, 103187. https://doi.org/10.1016/j.ejsobi.2020.103187	36.5	109.317	C	0.3772	10	9.686	20	14.7059	25.2941	8	4	0.449067
163	17	Ouyang, Y., & Li, X. (2020). Effect of repeated drying-rewetting cycles on soil extracellular enzyme activities and microbial community composition in arid and semi-arid ecosystems. European Journal of Soil Biology, 98, 103187. https://doi.org/10.1016/j.ejsobi.2020.103187	36.5	109.317	C	0.3772	10	9.686	20	14.7059	25.2941	8	5	0.371354
164	17	Ouyang, Y., & Li, X. (2020). Effect of repeated drying-rewetting cycles on soil extracellular enzyme activities and microbial community composition in arid and semi-arid ecosystems. European Journal of Soil Biology, 98, 103187. https://doi.org/10.1016/j.ejsobi.2020.103187	36.5	109.317	C	0.3772	10	9.686	20	14.7059	25.2941	8	6	0.318012
165	17	Ouyang, Y., & Li, X. (2020). Effect of repeated drying-rewetting cycles on soil extracellular enzyme activities and microbial community composition in arid and semi-arid ecosystems. European Journal of Soil Biology, 98, 103187. https://doi.org/10.1016/j.ejsobi.2020.103187	36.5	109.317	C	0.3772	10	9.686	20	14.7059	25.2941	8	7	0.342071
166	17	Ouyang, Y., & Li, X. (2020). Effect of repeated drying-rewetting cycles on soil extracellular enzyme activities and microbial community composition in arid and semi-arid ecosystems. European Journal of Soil Biology, 98, 103187. https://doi.org/10.1016/j.ejsobi.2020.103187	43.63	116.7	G	0.2595	10	12.18	20	12.0773	27.9227	13	1	1.26728
167	17	Ouyang, Y., & Li, X. (2020). Effect of repeated drying-rewetting cycles on soil extracellular enzyme activities and microbial community composition in arid and semi-arid ecosystems. European Journal of Soil Biology, 98, 103187. https://doi.org/10.1016/j.ejsobi.2020.103187	43.63	116.7	G	0.2595	10	12.18	20	12.0773	27.9227	13	2	0.986104
168	17	Ouyang, Y., & Li, X. (2020). Effect of repeated drying-rewetting cycles on soil extracellular enzyme activities and microbial community composition in arid and semi-arid ecosystems. European Journal of Soil Biology, 98, 103187. https://doi.org/10.1016/j.ejsobi.2020.103187	43.63	116.7	G	0.2595	10	12.18	20	12.0773	27.9227	13	3	0.538229
169	17	Ouyang, Y., & Li, X. (2020). Effect of repeated drying-rewetting cycles on soil extracellular enzyme activities and microbial community composition in arid and semi-arid ecosystems. European Journal of Soil Biology, 98, 103187. https://doi.org/10.1016/j.ejsobi.2020.103187	43.63	116.7	G	0.2595	10	12.18	20	12.0773	27.9227	13	4	0.488787
170	17	Ouyang, Y., & Li, X. (2020). Effect of repeated drying-rewetting cycles on soil extracellular enzyme activities and microbial community composition in arid and semi-arid ecosystems. European Journal of Soil Biology, 98, 103187. https://doi.org/10.1016/j.ejsobi.2020.103187	43.63	116.7	G	0.2595	10	12.18	20	12.0773	27.9227	13	5	0.431233
171	17	Ouyang, Y., & Li, X. (2020). Effect of repeated drying-rewetting cycles on soil extracellular enzyme activities and microbial community composition in arid and semi-arid ecosystems. European Journal of Soil Biology, 98, 103187. https://doi.org/10.1016/j.ejsobi.2020.103187	43.63	116.7	G	0.2595	10	12.18	20	12.0773	27.9227	8	1	1.12929
172	17	Ouyang, Y., & Li, X. (2020). Effect of repeated drying-rewetting cycles on soil extracellular enzyme activities and microbial community composition in arid and semi-arid ecosystems. European Journal of Soil Biology, 98, 103187. https://doi.org/10.1016/j.ejsobi.2020.103187	43.63	116.7	G	0.2595	10	12.18	20	12.0773	27.9227	8	2	1.02313
173	17	Ouyang, Y., & Li, X. (2020). Effect of repeated drying-rewetting cycles on soil extracellular enzyme activities and microbial community composition in arid and semi-arid ecosystems. European Journal of Soil Biology, 98, 103187. https://doi.org/10.1016/j.ejsobi.2020.103187	43.63	116.7	G	0.2595	10	12.18	20	12.0773	27.9227	8	3	1.01051
174	17	Ouyang, Y., & Li, X. (2020). Effect of repeated drying-rewetting cycles on soil extracellular enzyme activities and microbial community composition in arid and semi-arid ecosystems. European Journal of Soil Biology, 98, 103187. https://doi.org/10.1016/j.ejsobi.2020.103187	43.63	116.7	G	0.2595	10	12.18	20	12.0773	27.9227	8	4	0.579154
175	17	Ouyang, Y., & Li, X. (2020). Effect of repeated drying-rewetting cycles on soil extracellular enzyme activities and microbial community composition in arid and semi-arid ecosystems. European Journal of Soil Biology, 98, 103187. https://doi.org/10.1016/j.ejsobi.2020.103187	43.63	116.7	G	0.2595	10	12.18	20	12.0773	27.9227	8	5	0.432387
176	17	Ouyang, Y., & Li, X. (2020). Effect of repeated drying-rewetting cycles on soil extracellular enzyme activities and microbial community composition in arid and semi-arid ecosystems. European Journal of Soil Biology, 98, 103187. https://doi.org/10.1016/j.ejsobi.2020.103187	43.63	116.7	G	0.2595	10	12.18	20	12.0773	27.9227	8	6	0.4075
177	17	Ouyang, Y., & Li, X. (2020). Effect of repeated drying-rewetting cycles on soil extracellular enzyme activities and microbial community composition in arid and semi-arid ecosystems. European Journal of Soil Biology, 98, 103187. https://doi.org/10.1016/j.ejsobi.2020.103187	43.63	116.7	G	0.2595	10	12.18	20	12.0773	27.9227	8	7	0.42335
178	17	Ouyang, Y., & Li, X. (2020). Effect of repeated drying-rewetting cycles on soil extracellular enzyme activities and microbial community composition in arid and semi-arid ecosystems. European Journal of Soil Biology, 98, 103187. https://doi.org/10.1016/j.ejsobi.2020.103187	44.4	87.866	B	0.1019	10	5.8	20	18.6081	21.3919	13	1	0.50305
179	17	Ouyang, Y., & Li, X. (2020). Effect of repeated drying-rewetting cycles on soil extracellular enzyme activities and microbial community composition in arid and semi-arid ecosystems. European Journal of Soil Biology, 98, 103187. https://doi.org/10.1016/j.ejsobi.2020.103187	44.4	87.866	B	0.1019	10	5.8	20	18.6081	21.3919	13	2	0.453579
180	17	Ouyang, Y., & Li, X. (2020). Effect of repeated drying-rewetting cycles on soil extracellular enzyme activities and microbial community composition in arid and semi-arid ecosystems. European Journal of Soil Biology, 98, 103187. https://doi.org/10.1016/j.ejsobi.2020.103187	44.4	87.866	B	0.1019	10	5.8	20	18.6081	21.3919	13	3	0.265921
181	17	Ouyang, Y., & Li, X. (2020). Effect of repeated drying-rewetting cycles on soil extracellular enzyme activities and microbial community composition in arid and semi-arid ecosystems. European Journal of Soil Biology, 98, 103187. https://doi.org/10.1016/j.ejsobi.2020.103187	44.4	87.866	B	0.1019	10	5.8	20	18.6081	21.3919	13	4	0.27335
182	17	Ouyang, Y., & Li, X. (2020). Effect of repeated drying-rewetting cycles on soil extracellular enzyme activities and microbial community composition in arid and semi-arid ecosystems. European Journal of Soil Biology, 98, 103187. https://doi.org/10.1016/j.ejsobi.2020.103187	44.4	87.866	B	0.1019	10	5.8	20	18.6081	21.3919	13	5	0.22395
183	17	Ouyang, Y., & Li, X. (2020). Effect of repeated drying-rewetting cycles on soil extracellular enzyme activities and microbial community composition in arid and semi-arid ecosystems. European Journal of Soil Biology, 98, 103187. https://doi.org/10.1016/j.ejsobi.2020.103187	44.4	87.866	B	0.1019	10	5.8	20	18.6081	21.3919	8	1	0.495146
184	17	Ouyang, Y., & Li, X. (2020). Effect of repeated drying-rewetting cycles on soil extracellular enzyme activities and microbial community composition in arid and semi-arid ecosystems. European Journal of Soil Biology, 98, 103187. https://doi.org/10.1016/j.ejsobi.2020.103187	44.4	87.866	B	0.1019	10	5.8	20	18.6081	21.3919	8	2	0.490621
185	17	Ouyang, Y., & Li, X. (2020). Effect of repeated drying-rewetting cycles on soil extracellular enzyme activities and microbial community composition in arid and semi-arid ecosystems. European Journal of Soil Biology, 98, 103187. https://doi.org/10.1016/j.ejsobi.2020.103187	44.4	87.866	B	0.1019	10	5.8	20	18.6081	21.3919	8	3	0.416988
186	17	Ouyang, Y., & Li, X. (2020). Effect of repeated drying-rewetting cycles on soil extracellular enzyme activities and microbial community composition in arid and semi-arid ecosystems. European Journal of Soil Biology, 98, 103187. https://doi.org/10.1016/j.ejsobi.2020.103187	44.4	87.866	B	0.1019	10	5.8	20	18.6081	21.3919	8	4	0.19705
187	17	Ouyang, Y., & Li, X. (2020). Effect of repeated drying-rewetting cycles on soil extracellular enzyme activities and microbial community composition in arid and semi-arid ecosystems. European Journal of Soil Biology, 98, 103187. https://doi.org/10.1016/j.ejsobi.2020.103187	44.4	87.866	B	0.1019	10	5.8	20	18.6081	21.3919	8	5	0.196517
188	17	Ouyang, Y., & Li, X. (2020). Effect of repeated drying-rewetting cycles on soil extracellular enzyme activities and microbial community composition in arid and semi-arid ecosystems. European Journal of Soil Biology, 98, 103187. https://doi.org/10.1016/j.ejsobi.2020.103187	44.4	87.866	B	0.1019	10	5.8	20	18.6081	21.3919	8	6	0.187942
189	17	Ouyang, Y., & Li, X. (2020). Effect of repeated drying-rewetting cycles on soil extracellular enzyme activities and microbial community composition in arid and semi-arid ecosystems. European Journal of Soil Biology, 98, 103187. https://doi.org/10.1016/j.ejsobi.2020.103187	44.4	87.866	B	0.1019	10	5.8	20	18.6081	21.3919	8	7	0.207846
190	18	Qi, J., Markewitz, D., Foroughi, M., Jokela, E., Strahm, B., & Vogel, J. (2018). Drying-Wetting Cycles: Effect on Deep Soil Carbon. SOIL SYSTEMS, 2(1), 3. https://doi.org/10.3390/soils2010003	35.15	-94.97	F	0.7297	10	12.9	35	17	83	3	1	3.22
191	18	Qi, J., Markewitz, D., Foroughi, M., Jokela, E., Strahm, B., & Vogel, J. (2018). Drying-Wetting Cycles: Effect on Deep Soil Carbon. SOIL SYSTEMS, 2(1), 3. https://doi.org/10.3390/soils2010003	35.15	-94.97	F	0.7297	10	12.9	35	17	83	3	2	1.74292
192	18	Qi, J., Markewitz, D., Foroughi, M., Jokela, E., Strahm, B., & Vogel, J. (2018). Drying-Wetting Cycles: Effect on Deep Soil Carbon. SOIL SYSTEMS, 2(1), 3. https://doi.org/10.3390/soils2010003	35.15	-94.97	F	0.7297	10	12.9	35	17	83	3	3	1.16188
193	18	Qi, J., Markewitz, D., Foroughi, M., Jokela, E., Strahm, B., & Vogel, J. (2018). Drying-Wetting Cycles: Effect on Deep Soil Carbon. SOIL SYSTEMS, 2(1), 3. https://doi.org/10.3390/soils2010003	35.15	-94.97	F	0.7297	20	4.3	35	17	83	3	1	1.56313
194	18	Qi, J., Markewitz, D., Foroughi, M., Jokela, E., Strahm, B., & Vogel, J. (2018). Drying-Wetting Cycles: Effect on Deep Soil Carbon. SOIL SYSTEMS, 2(1), 3. https://doi.org/10.3390/soils2010003	35.15	-94.97	F	0.7297	20	4.3	35	17	83	3	2	0.614792
195	18	Qi, J., Markewitz, D., Foroughi, M., Jokela, E., Strahm, B., & Vogel, J. (2018). Drying-Wetting Cycles: Effect on Deep Soil Carbon. SOIL SYSTEMS, 2(1), 3. https://doi.org/10.3390/soils2010003	35.15	-94.97	F	0.7297	20	4.3	35	17	83	3	3	0.531042
196	18	Qi, J., Markewitz, D., Foroughi, M., Jokela, E., Strahm, B., & Vogel, J. (2018). Drying-Wetting Cycles: Effect on Deep Soil Carbon. SOIL SYSTEMS, 2(1), 3. https://doi.org/10.3390/soils2010003	37.57	-78.53	F	0.8422	10	38.9	35	17	83	3	1	2.21833
197	18	Qi, J., Markewitz, D., Foroughi, M., Jokela, E., Strahm, B., & Vogel, J. (2018). Drying-Wetting Cycles: Effect on Deep Soil Carbon. SOIL SYSTEMS, 2(1), 3. https://doi.org/10.3390/soils2010003	37.57	-78.53	F	0.8422	10	38.9	35	17	83	3	2	3.13396
198	18	Qi, J., Markewitz, D., Foroughi, M., Jokela, E., Strahm, B., & Vogel, J. (2018). Drying-Wetting Cycles: Effect on Deep Soil Carbon. SOIL SYSTEMS, 2(1), 3. https://doi.org/10.3390/soils2010003	37.57	-78.53	F	0.8422	10	38.9	35	17	83	3	3	1.97187
199	18	Qi, J., Markewitz, D., Foroughi, M., Jokela, E., Strahm, B., & Vogel, J. (2018). Drying-Wetting Cycles: Effect on Deep Soil Carbon. SOIL SYSTEMS, 2(1), 3. https://doi.org/10.3390/soils2010003	37.57	-78.53	F	0.8422	20	10	35	17	83	3	1	0.335417
200	18	Qi, J., Markewitz, D., Foroughi, M., Jokela, E., Strahm, B., & Vogel, J. (2018). Drying-Wetting Cycles: Effect on Deep Soil Carbon. SOIL SYSTEMS, 2(1), 3. https://doi.org/10.3390/soils2010003	37.57	-78.53	F	0.8422	20	10	35	17	83	3	2	0.754583
201	18	Qi, J., Markewitz, D., Foroughi, M., Jokela, E., Strahm, B., & Vogel, J. (2018). Drying-Wetting Cycles: Effect on Deep Soil Carbon. SOIL SYSTEMS, 2(1), 3. https://doi.org/10.3390/soils2010003	37.57	-78.53	F	0.8422	20	10	35	17	83	3	3	0.349375
202	18	Qi, J., Markewitz, D., Foroughi, M., Jokela, E., Strahm, B., & Vogel, J. (2018). Drying-Wetting Cycles: Effect on Deep Soil Carbon. SOIL SYSTEMS, 2(1), 3. https://doi.org/10.3390/soils2010003	33.57	-82.88	F	0.7875	10	19.2	35	17	83	3	1	3.01062
203	18	Qi, J., Markewitz, D., Foroughi, M., Jokela, E., Strahm, B., & Vogel, J. (2018). Drying-Wetting Cycles: Effect on Deep Soil Carbon. SOIL SYSTEMS, 2(1), 3. https://doi.org/10.3390/soils2010003	33.57	-82.88	F	0.7875	10	19.2	35	17	83	3	2	1.88375
204	18	Qi, J., Markewitz, D., Foroughi, M., Jokela, E., Strahm, B., & Vogel, J. (2018). Drying-Wetting Cycles: Effect on Deep Soil Carbon. SOIL SYSTEMS, 2(1), 3. https://doi.org/10.3390/soils2010003	33.57	-82.88	F	0.7875	10	19.2	35	17	83	3	3	1.39104
205	18	Qi, J., Markewitz, D., Foroughi, M., Jokela, E., Strahm, B., & Vogel, J. (2018). Drying-Wetting Cycles: Effect on Deep Soil Carbon. SOIL SYSTEMS, 2(1), 3. https://doi.org/10.3390/soils2010003	33.57	-82.88	F	0.7875	20	8.7	35	17	83	3	1	1.565
206	18	Qi, J., Markewitz, D., Foroughi, M., Jokela, E., Strahm, B., & Vogel, J. (2018). Drying-Wetting Cycles: Effect on Deep Soil Carbon. SOIL SYSTEMS, 2(1), 3. https://doi.org/10.3390/soils2010003	33.57	-82.88	F	0.7875	20	8.7	35	17	83	3	2	0.475208
207	18	Qi, J., Markewitz, D., Foroughi, M., Jokela, E., Strahm, B., & Vogel, J. (2018). Drying-Wetting Cycles: Effect on Deep Soil Carbon. SOIL SYSTEMS, 2(1), 3. https://doi.org/10.3390/soils2010003	33.57	-82.88	F	0.7875	20	8.7	35	17	83	3	3	0.307292
208	18	Qi, J., Markewitz, D., Foroughi, M., Jokela, E., Strahm, B., & Vogel, J. (2018). Drying-Wetting Cycles: Effect on Deep Soil Carbon. SOIL SYSTEMS, 2(1), 3. https://doi.org/10.3390/soils2010003	30.11	-83.58	F	0.8828	10	20.6	35	20	80	3	1	1.33813
209	18	Qi, J., Markewitz, D., Foroughi, M., Jokela, E., Strahm, B., & Vogel, J. (2018). Drying-Wetting Cycles: Effect on Deep Soil Carbon. SOIL SYSTEMS, 2(1), 3. https://doi.org/10.3390/soils2010003	30.11	-83.58	F	0.8828	10	20.6	35	20	80	3	2	1.17958
210	18	Qi, J., Markewitz, D., Foroughi, M., Jokela, E., Strahm, B., & Vogel, J. (2018). Drying-Wetting Cycles: Effect on Deep Soil Carbon. SOIL SYSTEMS, 2(1), 3. https://doi.org/10.3390/soils2010003	30.11	-83.58	F	0.8828	10	20.6	35	20	80	3	3	1.00333
211	18	Qi, J., Markewitz, D., Foroughi, M., Jokela, E., Strahm, B., & Vogel, J. (2018). Drying-Wetting Cycles: Effect on Deep Soil Carbon. SOIL SYSTEMS, 2(1), 3. https://doi.org/10.3390/soils2010003	30.11	-83.58	F	0.8828	20	13	35	20	80	3	1	0.576875
212	18	Qi, J., Markewitz, D., Foroughi, M., Jokela, E., Strahm, B., & Vogel, J. (2018). Drying-Wetting Cycles: Effect on Deep Soil Carbon. SOIL SYSTEMS, 2(1), 3. https://doi.org/10.3390/soils2010003	30.11	-83.58	F	0.8828	20	13	35	20	80	3	2	0.532292
213	18	Qi, J., Markewitz, D., Foroughi, M., Jokela, E., Strahm, B., & Vogel, J. (2018). Drying-Wetting Cycles: Effect on Deep Soil Carbon. SOIL SYSTEMS, 2(1), 3. https://doi.org/10.3390/soils2010003	30.11	-83.58	F	0.8828	20	13	35	20	80	3	3	0.510208
214	19	Rodríguez, A., Durán, J., Rey, A., Boudouris, I., Valladares, F., Gallardo, A., & Yuste, J. C. (2019). Interactive effects of forest die-off and drying-rewetting cycles on C and N mineralization. GEODERMA, 333, 81–89. https://doi.org/10.1016/j.geoderma.2018.07.003	40.383	-4.183	F	0.2233	10	30.6	25	10	30	13	1	19.9093
215	19	Rodríguez, A., Durán, J., Rey, A., Boudouris, I., Valladares, F., Gallardo, A., & Yuste, J. C. (2019). Interactive effects of forest die-off and drying-rewetting cycles on C and N mineralization. GEODERMA, 333, 81–89. https://doi.org/10.1016/j.geoderma.2018.07.003	40.383	-4.183	F	0.2233	10	30.6	25	10	30	13	2	8.90556
216	19	Rodríguez, A., Durán, J., Rey, A., Boudouris, I., Valladares, F., Gallardo, A., & Yuste, J. C. (2019). Interactive effects of forest die-off and drying-rewetting cycles on C and N mineralization. GEODERMA, 333, 81–89. https://doi.org/10.1016/j.geoderma.2018.07.003	40.383	-4.183	F	0.2233	10	30.6	25	10	30	13	3	3.97
217	20	Sawada, K., Funakawa, S., & Kosaki, T. (2017). Effect of repeated drying–rewetting cycles on microbial biomass carbon in soils with different climatic histories. Applied Soil Ecology, 120, 1–7. https://doi.org/10.1016/j.apsoil.2017.07.023	18.6	98.083	F	0.6614	10	61	25	5	45	7	1	5.7055
218	20	Sawada, K., Funakawa, S., & Kosaki, T. (2017). Effect of repeated drying–rewetting cycles on microbial biomass carbon in soils with different climatic histories. Applied Soil Ecology, 120, 1–7. https://doi.org/10.1016/j.apsoil.2017.07.023	18.6	98.083	F	0.6614	10	61	25	5	45	7	2	5.1361
219	20	Sawada, K., Funakawa, S., & Kosaki, T. (2017). Effect of repeated drying–rewetting cycles on microbial biomass carbon in soils with different climatic histories. Applied Soil Ecology, 120, 1–7. https://doi.org/10.1016/j.apsoil.2017.07.023	18.6	98.083	F	0.6614	10	61	25	5	45	7	3	4.2011
220	20	Sawada, K., Funakawa, S., & Kosaki, T. (2017). Effect of repeated drying–rewetting cycles on microbial biomass carbon in soils with different climatic histories. Applied Soil Ecology, 120, 1–7. https://doi.org/10.1016/j.apsoil.2017.07.023	18.6	98.083	F	0.6614	10	61	25	5	45	7	4	3.0936
221	20	Sawada, K., Funakawa, S., & Kosaki, T. (2017). Effect of repeated drying–rewetting cycles on microbial biomass carbon in soils with different climatic histories. Applied Soil Ecology, 120, 1–7. https://doi.org/10.1016/j.apsoil.2017.07.023	18.6	98.083	C	0.6614	10	32	25	5	45	7	1	2.1164
222	20	Sawada, K., Funakawa, S., & Kosaki, T. (2017). Effect of repeated drying–rewetting cycles on microbial biomass carbon in soils with different climatic histories. Applied Soil Ecology, 120, 1–7. https://doi.org/10.1016/j.apsoil.2017.07.023	18.6	98.083	C	0.6614	10	32	25	5	45	7	2	1.9696
223	20	Sawada, K., Funakawa, S., & Kosaki, T. (2017). Effect of repeated drying–rewetting cycles on microbial biomass carbon in soils with different climatic histories. Applied Soil Ecology, 120, 1–7. https://doi.org/10.1016/j.apsoil.2017.07.023	18.6	98.083	C	0.6614	10	32	25	5	45	7	3	1.3424
224	20	Sawada, K., Funakawa, S., & Kosaki, T. (2017). Effect of repeated drying–rewetting cycles on microbial biomass carbon in soils with different climatic histories. Applied Soil Ecology, 120, 1–7. https://doi.org/10.1016/j.apsoil.2017.07.023	18.6	98.083	C	0.6614	10	32	25	5	45	7	4	1.1766
225	20	Sawada, K., Funakawa, S., & Kosaki, T. (2017). Effect of repeated drying–rewetting cycles on microbial biomass carbon in soils with different climatic histories. Applied Soil Ecology, 120, 1–7. https://doi.org/10.1016/j.apsoil.2017.07.023	34.85	135.63	C	1.116	10	33	25	5	45	7	1	4.5319
226	20	Sawada, K., Funakawa, S., & Kosaki, T. (2017). Effect of repeated drying–rewetting cycles on microbial biomass carbon in soils with different climatic histories. Applied Soil Ecology, 120, 1–7. https://doi.org/10.1016/j.apsoil.2017.07.023	34.85	135.63	C	1.116	10	33	25	5	45	7	2	3.2069
227	20	Sawada, K., Funakawa, S., & Kosaki, T. (2017). Effect of repeated drying–rewetting cycles on microbial biomass carbon in soils with different climatic histories. Applied Soil Ecology, 120, 1–7. https://doi.org/10.1016/j.apsoil.2017.07.023	34.85	135.63	C	1.116	10	33	25	5	45	7	3	2.6506
228	20	Sawada, K., Funakawa, S., & Kosaki, T. (2017). Effect of repeated drying–rewetting cycles on microbial biomass carbon in soils with different climatic histories. Applied Soil Ecology, 120, 1–7. https://doi.org/10.1016/j.apsoil.2017.07.023	34.85	135.63	C	1.116	10	33	25	5	45	7	4	2.4017
229	20	Sawada, K., Funakawa, S., & Kosaki, T. (2017). Effect of repeated drying–rewetting cycles on microbial biomass carbon in soils with different climatic histories. Applied Soil Ecology, 120, 1–7. https://doi.org/10.1016/j.apsoil.2017.07.023	43.083	79.45	C	0.5519	10	27	25	5	45	7	1	1.25
230	20	Sawada, K., Funakawa, S., & Kosaki, T. (2017). Effect of repeated drying–rewetting cycles on microbial biomass carbon in soils with different climatic histories. Applied Soil Ecology, 120, 1–7. https://doi.org/10.1016/j.apsoil.2017.07.023	43.083	79.45	C	0.5519	10	27	25	5	45	7	2	1.0972
231	20	Sawada, K., Funakawa, S., & Kosaki, T. (2017). Effect of repeated drying–rewetting cycles on microbial biomass carbon in soils with different climatic histories. Applied Soil Ecology, 120, 1–7. https://doi.org/10.1016/j.apsoil.2017.07.023	43.083	79.45	C	0.5519	10	27	25	5	45	7	3	0.9253
232	20	Sawada, K., Funakawa, S., & Kosaki, T. (2017). Effect of repeated drying–rewetting cycles on microbial biomass carbon in soils with different climatic histories. Applied Soil Ecology, 120, 1–7. https://doi.org/10.1016/j.apsoil.2017.07.023	43.083	79.45	C	0.5519	10	27	25	5	45	7	4	0.9262
233	21	Shi, A., & Marschner, P. (2014). Drying and rewetting frequency influences cumulative respiration and its distribution over time in two soils with contrasting management. Soil Biology and Biochemistry, 72, 172–179. https://doi.org/10.1016/j.soilbio.2014.02.001	-34.97	139.63	C	0.1752	10	18.9	22	3	67	5	1	1.3205
234	21	Shi, A., & Marschner, P. (2014). Drying and rewetting frequency influences cumulative respiration and its distribution over time in two soils with contrasting management. Soil Biology and Biochemistry, 72, 172–179. https://doi.org/10.1016/j.soilbio.2014.02.001	-34.97	139.63	C	0.1752	10	18.9	22	3	67	5	2	1.0659
235	21	Shi, A., & Marschner, P. (2014). Drying and rewetting frequency influences cumulative respiration and its distribution over time in two soils with contrasting management. Soil Biology and Biochemistry, 72, 172–179. https://doi.org/10.1016/j.soilbio.2014.02.001	-34.97	139.63	C	0.1752	10	18.9	22	3	67	5	3	0.478
236	21	Shi, A., & Marschner, P. (2014). Drying and rewetting frequency influences cumulative respiration and its distribution over time in two soils with contrasting management. Soil Biology and Biochemistry, 72, 172–179. https://doi.org/10.1016/j.soilbio.2014.02.001	-34.97	139.63	C	0.1752	10	18.9	22	3	67	5	4	0.354533
237	22	Shi, A., & Marschner, P. (2017). Soil respiration and microbial biomass in multiple drying and rewetting cycles – Effect of glucose addition. Geoderma, 305, 219–227. https://doi.org/10.1016/j.geoderma.2017.06.010	-34.97	139.63	C	0.1752	10	18.9	22	6.5	43.5	8	1	2.80862
238	22	Shi, A., & Marschner, P. (2017). Soil respiration and microbial biomass in multiple drying and rewetting cycles – Effect of glucose addition. Geoderma, 305, 219–227. https://doi.org/10.1016/j.geoderma.2017.06.010	-34.97	139.63	C	0.1752	10	18.9	22	6.5	43.5	8	2	7.07451
239	22	Shi, A., & Marschner, P. (2017). Soil respiration and microbial biomass in multiple drying and rewetting cycles – Effect of glucose addition. Geoderma, 305, 219–227. https://doi.org/10.1016/j.geoderma.2017.06.010	-34.97	139.63	C	0.1752	10	18.9	22	6.5	43.5	8	3	3.88907
240	22	Shi, A., & Marschner, P. (2017). Soil respiration and microbial biomass in multiple drying and rewetting cycles – Effect of glucose addition. Geoderma, 305, 219–227. https://doi.org/10.1016/j.geoderma.2017.06.010	-34.97	139.63	C	0.1752	10	14.6	22	6.5	43.5	8	1	1.95823
241	22	Shi, A., & Marschner, P. (2017). Soil respiration and microbial biomass in multiple drying and rewetting cycles – Effect of glucose addition. Geoderma, 305, 219–227. https://doi.org/10.1016/j.geoderma.2017.06.010	-34.97	139.63	C	0.1752	10	14.6	22	6.5	43.5	8	2	5.27851
242	22	Shi, A., & Marschner, P. (2017). Soil respiration and microbial biomass in multiple drying and rewetting cycles – Effect of glucose addition. Geoderma, 305, 219–227. https://doi.org/10.1016/j.geoderma.2017.06.010	-34.97	139.63	C	0.1752	10	14.6	22	6.5	43.5	8	3	2.0151
243	22	Shi, A., & Marschner, P. (2017). Soil respiration and microbial biomass in multiple drying and rewetting cycles – Effect of glucose addition. Geoderma, 305, 219–227. https://doi.org/10.1016/j.geoderma.2017.06.010	-34.97	139.63	C	0.1752	10	18.9	22	6.5	43.5	6	1	2.04474
244	22	Shi, A., & Marschner, P. (2017). Soil respiration and microbial biomass in multiple drying and rewetting cycles – Effect of glucose addition. Geoderma, 305, 219–227. https://doi.org/10.1016/j.geoderma.2017.06.010	-34.97	139.63	C	0.1752	10	18.9	22	6.5	43.5	6	2	2.82319
245	22	Shi, A., & Marschner, P. (2017). Soil respiration and microbial biomass in multiple drying and rewetting cycles – Effect of glucose addition. Geoderma, 305, 219–227. https://doi.org/10.1016/j.geoderma.2017.06.010	-34.97	139.63	C	0.1752	10	18.9	22	6.5	43.5	6	3	3.66818
246	22	Shi, A., & Marschner, P. (2017). Soil respiration and microbial biomass in multiple drying and rewetting cycles – Effect of glucose addition. Geoderma, 305, 219–227. https://doi.org/10.1016/j.geoderma.2017.06.010	-34.97	139.63	C	0.1752	10	18.9	22	6.5	43.5	6	4	1.39899
247	22	Shi, A., & Marschner, P. (2017). Soil respiration and microbial biomass in multiple drying and rewetting cycles – Effect of glucose addition. Geoderma, 305, 219–227. https://doi.org/10.1016/j.geoderma.2017.06.010	-34.97	139.63	C	0.1752	10	14.6	22	6.5	43.5	6	1	2.70739
248	22	Shi, A., & Marschner, P. (2017). Soil respiration and microbial biomass in multiple drying and rewetting cycles – Effect of glucose addition. Geoderma, 305, 219–227. https://doi.org/10.1016/j.geoderma.2017.06.010	-34.97	139.63	C	0.1752	10	14.6	22	6.5	43.5	6	2	3.62719
249	22	Shi, A., & Marschner, P. (2017). Soil respiration and microbial biomass in multiple drying and rewetting cycles – Effect of glucose addition. Geoderma, 305, 219–227. https://doi.org/10.1016/j.geoderma.2017.06.010	-34.97	139.63	C	0.1752	10	14.6	22	6.5	43.5	6	3	4.59718
250	22	Shi, A., & Marschner, P. (2017). Soil respiration and microbial biomass in multiple drying and rewetting cycles – Effect of glucose addition. Geoderma, 305, 219–227. https://doi.org/10.1016/j.geoderma.2017.06.010	-34.97	139.63	C	0.1752	10	14.6	22	6.5	43.5	6	4	2.07016
251	22	Shi, A., & Marschner, P. (2017). Soil respiration and microbial biomass in multiple drying and rewetting cycles – Effect of glucose addition. Geoderma, 305, 219–227. https://doi.org/10.1016/j.geoderma.2017.06.010	-34.97	139.63	C	0.1752	10	30.9	22	6.5	43.5	8	1	2.34389
252	22	Shi, A., & Marschner, P. (2017). Soil respiration and microbial biomass in multiple drying and rewetting cycles – Effect of glucose addition. Geoderma, 305, 219–227. https://doi.org/10.1016/j.geoderma.2017.06.010	-34.97	139.63	C	0.1752	10	30.9	22	6.5	43.5	8	2	6.06606
253	22	Shi, A., & Marschner, P. (2017). Soil respiration and microbial biomass in multiple drying and rewetting cycles – Effect of glucose addition. Geoderma, 305, 219–227. https://doi.org/10.1016/j.geoderma.2017.06.010	-34.97	139.63	C	0.1752	10	30.9	22	6.5	43.5	8	3	3.87538
254	22	Shi, A., & Marschner, P. (2017). Soil respiration and microbial biomass in multiple drying and rewetting cycles – Effect of glucose addition. Geoderma, 305, 219–227. https://doi.org/10.1016/j.geoderma.2017.06.010	-34.97	139.63	C	0.1752	10	30.9	22	6.5	43.5	8	1	2.21772
255	22	Shi, A., & Marschner, P. (2017). Soil respiration and microbial biomass in multiple drying and rewetting cycles – Effect of glucose addition. Geoderma, 305, 219–227. https://doi.org/10.1016/j.geoderma.2017.06.010	-34.97	139.63	C	0.1752	10	29.2	22	6.5	43.5	8	2	3.82155
256	22	Shi, A., & Marschner, P. (2017). Soil respiration and microbial biomass in multiple drying and rewetting cycles – Effect of glucose addition. Geoderma, 305, 219–227. https://doi.org/10.1016/j.geoderma.2017.06.010	-34.97	139.63	C	0.1752	10	29.2	22	6.5	43.5	8	3	1.75139
257	22	Shi, A., & Marschner, P. (2017). Soil respiration and microbial biomass in multiple drying and rewetting cycles – Effect of glucose addition. Geoderma, 305, 219–227. https://doi.org/10.1016/j.geoderma.2017.06.010	-34.97	139.63	C	0.1752	10	29.2	22	6.5	43.5	6	1	2.40474
258	22	Shi, A., & Marschner, P. (2017). Soil respiration and microbial biomass in multiple drying and rewetting cycles – Effect of glucose addition. Geoderma, 305, 219–227. https://doi.org/10.1016/j.geoderma.2017.06.010	-34.97	139.63	C	0.1752	10	29.2	22	6.5	43.5	6	2	4.0442
259	22	Shi, A., & Marschner, P. (2017). Soil respiration and microbial biomass in multiple drying and rewetting cycles – Effect of glucose addition. Geoderma, 305, 219–227. https://doi.org/10.1016/j.geoderma.2017.06.010	-34.97	139.63	C	0.1752	10	30.9	22	6.5	43.5	6	3	5.05859
260	22	Shi, A., & Marschner, P. (2017). Soil respiration and microbial biomass in multiple drying and rewetting cycles – Effect of glucose addition. Geoderma, 305, 219–227. https://doi.org/10.1016/j.geoderma.2017.06.010	-34.97	139.63	C	0.1752	10	30.9	22	6.5	43.5	6	4	1.33128
261	22	Shi, A., & Marschner, P. (2017). Soil respiration and microbial biomass in multiple drying and rewetting cycles – Effect of glucose addition. Geoderma, 305, 219–227. https://doi.org/10.1016/j.geoderma.2017.06.010	-34.97	139.63	C	0.1752	10	30.9	22	6.5	43.5	6	1	0.840094
262	22	Shi, A., & Marschner, P. (2017). Soil respiration and microbial biomass in multiple drying and rewetting cycles – Effect of glucose addition. Geoderma, 305, 219–227. https://doi.org/10.1016/j.geoderma.2017.06.010	-34.97	139.63	C	0.1752	10	29.2	22	6.5	43.5	6	2	4.4822
263	22	Shi, A., & Marschner, P. (2017). Soil respiration and microbial biomass in multiple drying and rewetting cycles – Effect of glucose addition. Geoderma, 305, 219–227. https://doi.org/10.1016/j.geoderma.2017.06.010	-34.97	139.63	C	0.1752	10	29.2	22	6.5	43.5	6	3	4.3289
264	22	Shi, A., & Marschner, P. (2017). Soil respiration and microbial biomass in multiple drying and rewetting cycles – Effect of glucose addition. Geoderma, 305, 219–227. https://doi.org/10.1016/j.geoderma.2017.06.010	-34.97	139.63	C	0.1752	10	29.2	22	6.5	43.5	6	4	2.2922
265	23	Tiemann, L. K., & Billings, S. A. (2011). Changes in variability of soil moisture alter microbial community C and N resource use. Soil Biology and Biochemistry, 43(9), 1837–1847. https://doi.org/10.1016/j.soilbio.2011.04.020	38.17	-95.24	G	0.6704	10	27.202	24	6	69	14	1	1.28958
266	23	Tiemann, L. K., & Billings, S. A. (2011). Changes in variability of soil moisture alter microbial community C and N resource use. Soil Biology and Biochemistry, 43(9), 1837–1847. https://doi.org/10.1016/j.soilbio.2011.04.020	38.17	-95.24	G	0.6704	10	27.202	24	6	69	14	2	1.43958
267	23	Tiemann, L. K., & Billings, S. A. (2011). Changes in variability of soil moisture alter microbial community C and N resource use. Soil Biology and Biochemistry, 43(9), 1837–1847. https://doi.org/10.1016/j.soilbio.2011.04.020	38.17	-95.24	G	0.6704	10	27.202	24	6	69	14	3	1.4375
268	23	Tiemann, L. K., & Billings, S. A. (2011). Changes in variability of soil moisture alter microbial community C and N resource use. Soil Biology and Biochemistry, 43(9), 1837–1847. https://doi.org/10.1016/j.soilbio.2011.04.020	38.17	-95.24	G	0.6704	10	27.202	24	6	69	14	4	1.57917
269	23	Tiemann, L. K., & Billings, S. A. (2011). Changes in variability of soil moisture alter microbial community C and N resource use. Soil Biology and Biochemistry, 43(9), 1837–1847. https://doi.org/10.1016/j.soilbio.2011.04.020	39.8	-96.6	G	0.5343	10	33.988	24	4	71	14	1	3.46875
270	23	Tiemann, L. K., & Billings, S. A. (2011). Changes in variability of soil moisture alter microbial community C and N resource use. Soil Biology and Biochemistry, 43(9), 1837–1847. https://doi.org/10.1016/j.soilbio.2011.04.020	39.8	-96.6	G	0.5343	10	33.988	24	4	71	14	2	3.95833
271	23	Tiemann, L. K., & Billings, S. A. (2011). Changes in variability of soil moisture alter microbial community C and N resource use. Soil Biology and Biochemistry, 43(9), 1837–1847. https://doi.org/10.1016/j.soilbio.2011.04.020	39.8	-96.6	G	0.5343	10	33.988	24	4	71	14	3	3.95833
272	23	Tiemann, L. K., & Billings, S. A. (2011). Changes in variability of soil moisture alter microbial community C and N resource use. Soil Biology and Biochemistry, 43(9), 1837–1847. https://doi.org/10.1016/j.soilbio.2011.04.020	39.8	-96.6	G	0.5343	10	33.988	24	4	71	14	4	1.94792
273	23	Tiemann, L. K., & Billings, S. A. (2011). Changes in variability of soil moisture alter microbial community C and N resource use. Soil Biology and Biochemistry, 43(9), 1837–1847. https://doi.org/10.1016/j.soilbio.2011.04.020	38.83	-99.3	G	0.3293	10	45.936	24	8	67	14	1	0.83125
274	23	Tiemann, L. K., & Billings, S. A. (2011). Changes in variability of soil moisture alter microbial community C and N resource use. Soil Biology and Biochemistry, 43(9), 1837–1847. https://doi.org/10.1016/j.soilbio.2011.04.020	38.83	-99.3	G	0.3293	10	45.936	24	8	67	14	2	2.29583
275	23	Tiemann, L. K., & Billings, S. A. (2011). Changes in variability of soil moisture alter microbial community C and N resource use. Soil Biology and Biochemistry, 43(9), 1837–1847. https://doi.org/10.1016/j.soilbio.2011.04.020	38.83	-99.3	G	0.3293	10	45.936	24	8	67	14	3	2.64583
276	23	Tiemann, L. K., & Billings, S. A. (2011). Changes in variability of soil moisture alter microbial community C and N resource use. Soil Biology and Biochemistry, 43(9), 1837–1847. https://doi.org/10.1016/j.soilbio.2011.04.020	38.83	-99.3	G	0.3293	10	45.936	24	8	67	14	4	1.4625
277	23	Tiemann, L. K., & Billings, S. A. (2011). Changes in variability of soil moisture alter microbial community C and N resource use. Soil Biology and Biochemistry, 43(9), 1837–1847. https://doi.org/10.1016/j.soilbio.2011.04.020	38.86	-100.98	G	0.2564	10	18.154	24	4	71	14	1	2.65625
278	23	Tiemann, L. K., & Billings, S. A. (2011). Changes in variability of soil moisture alter microbial community C and N resource use. Soil Biology and Biochemistry, 43(9), 1837–1847. https://doi.org/10.1016/j.soilbio.2011.04.020	38.86	-100.98	G	0.2564	10	18.154	24	4	71	14	2	1.87708
279	23	Tiemann, L. K., & Billings, S. A. (2011). Changes in variability of soil moisture alter microbial community C and N resource use. Soil Biology and Biochemistry, 43(9), 1837–1847. https://doi.org/10.1016/j.soilbio.2011.04.020	38.86	-100.98	G	0.2564	10	18.154	24	4	71	14	3	2.80625
280	23	Tiemann, L. K., & Billings, S. A. (2011). Changes in variability of soil moisture alter microbial community C and N resource use. Soil Biology and Biochemistry, 43(9), 1837–1847. https://doi.org/10.1016/j.soilbio.2011.04.020	38.86	-100.98	G	0.2564	10	18.154	24	4	71	14	4	2.54375
281	24	Wu, J., & Brookes, P. C. (2005). The proportional mineralisation of microbial biomass and organic matter caused by air-drying and rewetting of a grassland soil. Soil Biology and Biochemistry, 37(3), 507–515. https://doi.org/10.1016/j.soilbio.2004.07.043	51.8	-0.37	G	0.8695	10	40.4	25	5	45	7	1	5.52812
282	24	Wu, J., & Brookes, P. C. (2005). The proportional mineralisation of microbial biomass and organic matter caused by air-drying and rewetting of a grassland soil. Soil Biology and Biochemistry, 37(3), 507–515. https://doi.org/10.1016/j.soilbio.2004.07.043	51.8	-0.37	G	0.8695	10	40.4	25	5	45	7	2	4.04604
283	24	Wu, J., & Brookes, P. C. (2005). The proportional mineralisation of microbial biomass and organic matter caused by air-drying and rewetting of a grassland soil. Soil Biology and Biochemistry, 37(3), 507–515. https://doi.org/10.1016/j.soilbio.2004.07.043	51.8	-0.37	G	0.8695	10	40.4	25	5	45	7	3	3.43979
284	24	Wu, J., & Brookes, P. C. (2005). The proportional mineralisation of microbial biomass and organic matter caused by air-drying and rewetting of a grassland soil. Soil Biology and Biochemistry, 37(3), 507–515. https://doi.org/10.1016/j.soilbio.2004.07.043	51.8	-0.37	G	0.8695	10	40.4	25	5	45	7	4	3.37375
285	25	Yang, F., Lee, X., Theng, B. K. G., Wang, B., Cheng, J., & Wang, Q. (2017). Effect of biochar addition on short-term N2O and CO2 emissions during repeated drying and wetting of an anthropogenic alluvial soil. Environ Geochem Health, 39(3), 635–647. https://doi.org/10.1007/s10653-016-9838-9	39.39	75.97	C	0.0594	20	29.2	25	18.75	51.25	7	1	1.97813
286	25	Yang, F., Lee, X., Theng, B. K. G., Wang, B., Cheng, J., & Wang, Q. (2017). Effect of biochar addition on short-term N2O and CO2 emissions during repeated drying and wetting of an anthropogenic alluvial soil. Environ Geochem Health, 39(3), 635–647. https://doi.org/10.1007/s10653-016-9838-9	39.39	75.97	C	0.0594	20	29.2	25	18.75	51.25	7	2	1.86971
287	25	Yang, F., Lee, X., Theng, B. K. G., Wang, B., Cheng, J., & Wang, Q. (2017). Effect of biochar addition on short-term N2O and CO2 emissions during repeated drying and wetting of an anthropogenic alluvial soil. Environ Geochem Health, 39(3), 635–647. https://doi.org/10.1007/s10653-016-9838-9	39.39	75.97	C	0.0594	20	29.2	25	18.75	51.25	7	3	1.0847
288	25	Yang, F., Lee, X., Theng, B. K. G., Wang, B., Cheng, J., & Wang, Q. (2017). Effect of biochar addition on short-term N2O and CO2 emissions during repeated drying and wetting of an anthropogenic alluvial soil. Environ Geochem Health, 39(3), 635–647. https://doi.org/10.1007/s10653-016-9838-9	39.39	75.97	C	0.0594	20	29.2	25	20	50	7	1	2.61049
289	25	Yang, F., Lee, X., Theng, B. K. G., Wang, B., Cheng, J., & Wang, Q. (2017). Effect of biochar addition on short-term N2O and CO2 emissions during repeated drying and wetting of an anthropogenic alluvial soil. Environ Geochem Health, 39(3), 635–647. https://doi.org/10.1007/s10653-016-9838-9	39.39	75.97	C	0.0594	20	29.2	25	20	50	7	2	2.29024
290	25	Yang, F., Lee, X., Theng, B. K. G., Wang, B., Cheng, J., & Wang, Q. (2017). Effect of biochar addition on short-term N2O and CO2 emissions during repeated drying and wetting of an anthropogenic alluvial soil. Environ Geochem Health, 39(3), 635–647. https://doi.org/10.1007/s10653-016-9838-9	39.39	75.97	C	0.0594	20	29.2	25	20	50	7	3	1.52878
291	25	Yang, F., Lee, X., Theng, B. K. G., Wang, B., Cheng, J., & Wang, Q. (2017). Effect of biochar addition on short-term N2O and CO2 emissions during repeated drying and wetting of an anthropogenic alluvial soil. Environ Geochem Health, 39(3), 635–647. https://doi.org/10.1007/s10653-016-9838-9	39.39	75.97	C	0.0594	20	29.2	25	24	46	7	1	3.01498
292	25	Yang, F., Lee, X., Theng, B. K. G., Wang, B., Cheng, J., & Wang, Q. (2017). Effect of biochar addition on short-term N2O and CO2 emissions during repeated drying and wetting of an anthropogenic alluvial soil. Environ Geochem Health, 39(3), 635–647. https://doi.org/10.1007/s10653-016-9838-9	39.39	75.97	C	0.0594	20	29.2	25	24	46	7	2	2.79106
293	25	Yang, F., Lee, X., Theng, B. K. G., Wang, B., Cheng, J., & Wang, Q. (2017). Effect of biochar addition on short-term N2O and CO2 emissions during repeated drying and wetting of an anthropogenic alluvial soil. Environ Geochem Health, 39(3), 635–647. https://doi.org/10.1007/s10653-016-9838-9	39.39	75.97	C	0.0594	20	29.2	25	24	46	7	3	1.75948
294	26	Yang, X., Jiang, N., & Sun, D. (2024). Dry–wet cycles induce the decoupling of carbon and nitrogen mineralization at high temperatures in semi-arid grassland soil. Soil Biology and Biochemistry, 188, 109227. https://doi.org/10.1016/j.soilbio.2023.109227	41.28	114.68	G	0.2687	10	12.1684	10	5	40	7	1	0.892375
295	26	Yang, X., Jiang, N., & Sun, D. (2024). Dry–wet cycles induce the decoupling of carbon and nitrogen mineralization at high temperatures in semi-arid grassland soil. Soil Biology and Biochemistry, 188, 109227. https://doi.org/10.1016/j.soilbio.2023.109227	41.28	114.68	G	0.2687	10	12.1684	10	5	40	7	2	0.904667
296	26	Yang, X., Jiang, N., & Sun, D. (2024). Dry–wet cycles induce the decoupling of carbon and nitrogen mineralization at high temperatures in semi-arid grassland soil. Soil Biology and Biochemistry, 188, 109227. https://doi.org/10.1016/j.soilbio.2023.109227	41.28	114.68	G	0.2687	10	12.1684	10	5	40	7	3	0.65975
297	26	Yang, X., Jiang, N., & Sun, D. (2024). Dry–wet cycles induce the decoupling of carbon and nitrogen mineralization at high temperatures in semi-arid grassland soil. Soil Biology and Biochemistry, 188, 109227. https://doi.org/10.1016/j.soilbio.2023.109227	41.28	114.68	G	0.2687	10	12.1684	10	5	40	7	4	0.484042
298	26	Yang, X., Jiang, N., & Sun, D. (2024). Dry–wet cycles induce the decoupling of carbon and nitrogen mineralization at high temperatures in semi-arid grassland soil. Soil Biology and Biochemistry, 188, 109227. https://doi.org/10.1016/j.soilbio.2023.109227	41.28	114.68	G	0.2687	10	12.1684	25	5	40	7	1	1.55754
299	26	Yang, X., Jiang, N., & Sun, D. (2024). Dry–wet cycles induce the decoupling of carbon and nitrogen mineralization at high temperatures in semi-arid grassland soil. Soil Biology and Biochemistry, 188, 109227. https://doi.org/10.1016/j.soilbio.2023.109227	41.28	114.68	G	0.2687	10	12.1684	25	5	40	7	2	1.42154
300	26	Yang, X., Jiang, N., & Sun, D. (2024). Dry–wet cycles induce the decoupling of carbon and nitrogen mineralization at high temperatures in semi-arid grassland soil. Soil Biology and Biochemistry, 188, 109227. https://doi.org/10.1016/j.soilbio.2023.109227	41.28	114.68	G	0.2687	10	12.1684	25	5	40	7	3	1.1865
301	26	Yang, X., Jiang, N., & Sun, D. (2024). Dry–wet cycles induce the decoupling of carbon and nitrogen mineralization at high temperatures in semi-arid grassland soil. Soil Biology and Biochemistry, 188, 109227. https://doi.org/10.1016/j.soilbio.2023.109227	41.28	114.68	G	0.2687	10	12.1684	25	5	40	7	4	1.19875
302	26	Yang, X., Jiang, N., & Sun, D. (2024). Dry–wet cycles induce the decoupling of carbon and nitrogen mineralization at high temperatures in semi-arid grassland soil. Soil Biology and Biochemistry, 188, 109227. https://doi.org/10.1016/j.soilbio.2023.109227	41.28	114.68	G	0.2687	10	12.1684	35	5	40	7	1	2.74733
303	26	Yang, X., Jiang, N., & Sun, D. (2024). Dry–wet cycles induce the decoupling of carbon and nitrogen mineralization at high temperatures in semi-arid grassland soil. Soil Biology and Biochemistry, 188, 109227. https://doi.org/10.1016/j.soilbio.2023.109227	41.28	114.68	G	0.2687	10	12.1684	35	5	40	7	2	2.37371
304	26	Yang, X., Jiang, N., & Sun, D. (2024). Dry–wet cycles induce the decoupling of carbon and nitrogen mineralization at high temperatures in semi-arid grassland soil. Soil Biology and Biochemistry, 188, 109227. https://doi.org/10.1016/j.soilbio.2023.109227	41.28	114.68	G	0.2687	10	12.1684	35	5	40	7	3	1.85171
305	26	Yang, X., Jiang, N., & Sun, D. (2024). Dry–wet cycles induce the decoupling of carbon and nitrogen mineralization at high temperatures in semi-arid grassland soil. Soil Biology and Biochemistry, 188, 109227. https://doi.org/10.1016/j.soilbio.2023.109227	41.28	114.68	G	0.2687	10	12.1684	35	5	40	7	4	1.24042
306	27	Yemadje, P. L., Chevallier, T., Guibert, H., Bertrand, I., & Bernoux, M. (2017). Wetting-drying cycles do not increase organic carbon and nitrogen mineralization in soils with straw amendment. GEODERMA, 304, 68–75. https://doi.org/10.1016/j.geoderma.2016.06.023	9.38	13.5	C	0.4222	10	11.1	28	2	98	7	1	0.776167
307	27	Yemadje, P. L., Chevallier, T., Guibert, H., Bertrand, I., & Bernoux, M. (2017). Wetting-drying cycles do not increase organic carbon and nitrogen mineralization in soils with straw amendment. GEODERMA, 304, 68–75. https://doi.org/10.1016/j.geoderma.2016.06.023	9.38	13.5	C	0.4222	10	11.1	28	2	98	7	2	0.324458
308	27	Yemadje, P. L., Chevallier, T., Guibert, H., Bertrand, I., & Bernoux, M. (2017). Wetting-drying cycles do not increase organic carbon and nitrogen mineralization in soils with straw amendment. GEODERMA, 304, 68–75. https://doi.org/10.1016/j.geoderma.2016.06.023	9.38	13.5	C	0.4222	10	11.1	28	2	98	7	3	0.19525
309	27	Yemadje, P. L., Chevallier, T., Guibert, H., Bertrand, I., & Bernoux, M. (2017). Wetting-drying cycles do not increase organic carbon and nitrogen mineralization in soils with straw amendment. GEODERMA, 304, 68–75. https://doi.org/10.1016/j.geoderma.2016.06.023	9.38	13.5	C	0.4222	10	11.1	28	2	98	7	4	0.107583
310	27	Yemadje, P. L., Chevallier, T., Guibert, H., Bertrand, I., & Bernoux, M. (2017). Wetting-drying cycles do not increase organic carbon and nitrogen mineralization in soils with straw amendment. GEODERMA, 304, 68–75. https://doi.org/10.1016/j.geoderma.2016.06.023	9.38	13.5	C	0.4222	10	11.1	28	2	98	7	5	0.21275
311	28	Yu, Z., Wang, G., & Marschner, P. (2014). Drying and rewetting – Effect of frequency of cycles and length of moist period on soil respiration and microbial biomass. EUROPEAN JOURNAL OF SOIL BIOLOGY, 62, 132–137. https://doi.org/10.1016/j.ejsobi.2014.03.007	-35.1	139	C	0.2422	5	15.3	22.5	5	45	7	1	10.3692
312	28	Yu, Z., Wang, G., & Marschner, P. (2014). Drying and rewetting – Effect of frequency of cycles and length of moist period on soil respiration and microbial biomass. EUROPEAN JOURNAL OF SOIL BIOLOGY, 62, 132–137. https://doi.org/10.1016/j.ejsobi.2014.03.007	-35.1	140	C	0.1822	5	15.3	22.5	5	45	7	2	3.36542
313	28	Yu, Z., Wang, G., & Marschner, P. (2014). Drying and rewetting – Effect of frequency of cycles and length of moist period on soil respiration and microbial biomass. EUROPEAN JOURNAL OF SOIL BIOLOGY, 62, 132–137. https://doi.org/10.1016/j.ejsobi.2014.03.007	-35.1	141	C	0.163	5	15.3	22.5	5	45	7	3	3.98083
314	29	Zhang, K., Qiu, Y., Zhao, Y., Wang, S., Deng, J., Chen, M., Xu, X., Wang, H., Bai, T., & He, T. (2023). Moderate precipitation reduction enhances nitrogen cycling and soil nitrous oxide emissions in a semi‐arid grassland. Global Change Biology, 29(11), 3114–3129.	36.2	106.4	G	0.3793	10	40.2	18	7	63	7	1	0.171971
315	29	Zhang, K., Qiu, Y., Zhao, Y., Wang, S., Deng, J., Chen, M., Xu, X., Wang, H., Bai, T., & He, T. (2023). Moderate precipitation reduction enhances nitrogen cycling and soil nitrous oxide emissions in a semi‐arid grassland. Global Change Biology, 29(11), 3114–3129.	36.2	106.4	G	0.3793	10	40.2	18	7	63	7	2	0.207759
316	29	Zhang, K., Qiu, Y., Zhao, Y., Wang, S., Deng, J., Chen, M., Xu, X., Wang, H., Bai, T., & He, T. (2023). Moderate precipitation reduction enhances nitrogen cycling and soil nitrous oxide emissions in a semi‐arid grassland. Global Change Biology, 29(11), 3114–3129.	36.2	106.4	G	0.3793	10	40.2	18	7	63	7	3	0.175992
317	30	Zhang, Z., Wang, D., & Li, M. (2022). Soil respiration, aggregate stability and nutrient availability affected by drying duration and drying-rewetting frequency. GEODERMA, 413, 115743. https://doi.org/10.1016/j.geoderma.2022.115743	39.9667	116.183	C	0.3794	10	19.96	25	6.5	53.5	8	1	2.90526
318	30	Zhang, Z., Wang, D., & Li, M. (2022). Soil respiration, aggregate stability and nutrient availability affected by drying duration and drying-rewetting frequency. GEODERMA, 413, 115743. https://doi.org/10.1016/j.geoderma.2022.115743	39.9667	116.183	C	0.3794	10	19.96	25	6.5	53.5	8	2	1.82721
319	30	Zhang, Z., Wang, D., & Li, M. (2022). Soil respiration, aggregate stability and nutrient availability affected by drying duration and drying-rewetting frequency. GEODERMA, 413, 115743. https://doi.org/10.1016/j.geoderma.2022.115743	39.9667	116.183	C	0.3794	10	19.96	25	6.5	53.5	8	3	1.27069
320	30	Zhang, Z., Wang, D., & Li, M. (2022). Soil respiration, aggregate stability and nutrient availability affected by drying duration and drying-rewetting frequency. GEODERMA, 413, 115743. https://doi.org/10.1016/j.geoderma.2022.115743	39.9667	116.183	C	0.3794	10	19.96	25	6.5	53.5	6	1	2.58117
321	30	Zhang, Z., Wang, D., & Li, M. (2022). Soil respiration, aggregate stability and nutrient availability affected by drying duration and drying-rewetting frequency. GEODERMA, 413, 115743. https://doi.org/10.1016/j.geoderma.2022.115743	39.9667	116.183	C	0.3794	10	19.96	25	6.5	53.5	6	2	2.06056
322	30	Zhang, Z., Wang, D., & Li, M. (2022). Soil respiration, aggregate stability and nutrient availability affected by drying duration and drying-rewetting frequency. GEODERMA, 413, 115743. https://doi.org/10.1016/j.geoderma.2022.115743	39.9667	116.183	C	0.3794	10	19.96	25	6.5	53.5	6	3	1.48433
323	30	Zhang, Z., Wang, D., & Li, M. (2022). Soil respiration, aggregate stability and nutrient availability affected by drying duration and drying-rewetting frequency. GEODERMA, 413, 115743. https://doi.org/10.1016/j.geoderma.2022.115743	39.9667	116.183	C	0.3794	10	19.96	25	6.5	53.5	6	4	1.0335
324	30	Zhang, Z., Wang, D., & Li, M. (2022). Soil respiration, aggregate stability and nutrient availability affected by drying duration and drying-rewetting frequency. GEODERMA, 413, 115743. https://doi.org/10.1016/j.geoderma.2022.115743	39.9667	116.183	C	0.3794	10	19.96	25	6.5	53.5	4	1	2.01296
325	30	Zhang, Z., Wang, D., & Li, M. (2022). Soil respiration, aggregate stability and nutrient availability affected by drying duration and drying-rewetting frequency. GEODERMA, 413, 115743. https://doi.org/10.1016/j.geoderma.2022.115743	39.9667	116.183	C	0.3794	10	19.96	25	6.5	53.5	4	2	1.59906
326	30	Zhang, Z., Wang, D., & Li, M. (2022). Soil respiration, aggregate stability and nutrient availability affected by drying duration and drying-rewetting frequency. GEODERMA, 413, 115743. https://doi.org/10.1016/j.geoderma.2022.115743	39.9667	116.183	C	0.3794	10	19.96	25	6.5	53.5	4	3	1.25781
327	30	Zhang, Z., Wang, D., & Li, M. (2022). Soil respiration, aggregate stability and nutrient availability affected by drying duration and drying-rewetting frequency. GEODERMA, 413, 115743. https://doi.org/10.1016/j.geoderma.2022.115743	39.9667	116.183	C	0.3794	10	19.96	25	6.5	53.5	4	4	1.07812
328	30	Zhang, Z., Wang, D., & Li, M. (2022). Soil respiration, aggregate stability and nutrient availability affected by drying duration and drying-rewetting frequency. GEODERMA, 413, 115743. https://doi.org/10.1016/j.geoderma.2022.115743	39.9667	116.183	C	0.3794	10	19.96	25	6.5	53.5	4	5	0.855875
329	30	Zhang, Z., Wang, D., & Li, M. (2022). Soil respiration, aggregate stability and nutrient availability affected by drying duration and drying-rewetting frequency. GEODERMA, 413, 115743. https://doi.org/10.1016/j.geoderma.2022.115743	39.9667	116.183	C	0.3794	10	19.96	25	6.5	53.5	4	6	0.719
330	31	Chen Xinyue. (2022). Response of soil organic carbon mineralization to drying-rewetting events after long-term drought in a subtropical forest. East China Normal University, (In Chinese)	29.8	121.45	F	0.9682	10	36.94	25	20	40	7	1	3.11586
331	31	Chen Xinyue. (2022). Response of soil organic carbon mineralization to drying-rewetting events after long-term drought in a subtropical forest. East China Normal University, (In Chinese)	29.8	121.45	F	0.9682	10	36.94	25	20	40	7	2	3.11294
332	31	Chen Xinyue. (2022). Response of soil organic carbon mineralization to drying-rewetting events after long-term drought in a subtropical forest. East China Normal University, (In Chinese)	29.8	121.45	F	0.9682	10	36.94	25	20	40	7	3	2.98632
333	32	Fan C. P., Hu Y. L., Lai J. T., & Zeng D. H. (2015). Effects of drying and rewetting on soil C and N mineralization rates in Mongolian pine plantation in a semi-arid region. Chinese Journal of Ecology, 34(12), 3360-3367. (In Chinese)	42.96	122.35	F	0.3458	20	4.04	25	16	64	4	1	0.245901
334	32	Fan C. P., Hu Y. L., Lai J. T., & Zeng D. H. (2015). Effects of drying and rewetting on soil C and N mineralization rates in Mongolian pine plantation in a semi-arid region. Chinese Journal of Ecology, 34(12), 3360-3367. (In Chinese)	42.96	122.35	F	0.3458	20	4.04	25	16	64	4	2	0.322431
335	32	Fan C. P., Hu Y. L., Lai J. T., & Zeng D. H. (2015). Effects of drying and rewetting on soil C and N mineralization rates in Mongolian pine plantation in a semi-arid region. Chinese Journal of Ecology, 34(12), 3360-3367. (In Chinese)	42.96	122.35	F	0.3458	20	4.04	25	16	64	4	3	0.203871
336	33	Huang, Shi-De, Ye, Gong-Fu, Lin, Jie, Ruan, Hong-Hua, Jin, Chang-Sun, Li, Yuan-Yuan, & Chen, J. (2018). Effects of drying-wetting cycles on soil organic carbon mineralization along an elevation gradient in Wuyi Mountain. Chinese Journal of Ecology, 37(2), 312-321. (In Chinese)	27.57	117.65	F	1.413	10	82.5	5	36.868	23.132	28	1	2.6339
337	33	Huang, Shi-De, Ye, Gong-Fu, Lin, Jie, Ruan, Hong-Hua, Jin, Chang-Sun, Li, Yuan-Yuan, & Chen, J. (2018). Effects of drying-wetting cycles on soil organic carbon mineralization along an elevation gradient in Wuyi Mountain. Chinese Journal of Ecology, 37(2), 312-321. (In Chinese)	27.57	117.65	F	1.413	10	82.5	5	36.868	23.132	28	2	2.07977
338	33	Huang, Shi-De, Ye, Gong-Fu, Lin, Jie, Ruan, Hong-Hua, Jin, Chang-Sun, Li, Yuan-Yuan, & Chen, J. (2018). Effects of drying-wetting cycles on soil organic carbon mineralization along an elevation gradient in Wuyi Mountain. Chinese Journal of Ecology, 37(2), 312-321. (In Chinese)	27.57	117.65	F	1.413	10	82.5	5	32.7333	27.2667	28	3	1.71865
339	33	Huang, Shi-De, Ye, Gong-Fu, Lin, Jie, Ruan, Hong-Hua, Jin, Chang-Sun, Li, Yuan-Yuan, & Chen, J. (2018). Effects of drying-wetting cycles on soil organic carbon mineralization along an elevation gradient in Wuyi Mountain. Chinese Journal of Ecology, 37(2), 312-321. (In Chinese)	27.57	117.65	F	1.413	10	66.2	5	38.2333	21.7667	28	1	2.07335
340	33	Huang, Shi-De, Ye, Gong-Fu, Lin, Jie, Ruan, Hong-Hua, Jin, Chang-Sun, Li, Yuan-Yuan, & Chen, J. (2018). Effects of drying-wetting cycles on soil organic carbon mineralization along an elevation gradient in Wuyi Mountain. Chinese Journal of Ecology, 37(2), 312-321. (In Chinese)	27.57	117.65	F	1.413	10	66.2	5	38.2333	21.7667	28	2	1.672
341	33	Huang, Shi-De, Ye, Gong-Fu, Lin, Jie, Ruan, Hong-Hua, Jin, Chang-Sun, Li, Yuan-Yuan, & Chen, J. (2018). Effects of drying-wetting cycles on soil organic carbon mineralization along an elevation gradient in Wuyi Mountain. Chinese Journal of Ecology, 37(2), 312-321. (In Chinese)	27.57	117.65	F	1.413	10	66.2	5	29.8667	30.1333	28	3	1.38946
342	33	Huang, Shi-De, Ye, Gong-Fu, Lin, Jie, Ruan, Hong-Hua, Jin, Chang-Sun, Li, Yuan-Yuan, & Chen, J. (2018). Effects of drying-wetting cycles on soil organic carbon mineralization along an elevation gradient in Wuyi Mountain. Chinese Journal of Ecology, 37(2), 312-321. (In Chinese)	27.57	117.65	F	1.413	10	55.4	5	45.1947	14.8053	28	1	1.74669
343	33	Huang, Shi-De, Ye, Gong-Fu, Lin, Jie, Ruan, Hong-Hua, Jin, Chang-Sun, Li, Yuan-Yuan, & Chen, J. (2018). Effects of drying-wetting cycles on soil organic carbon mineralization along an elevation gradient in Wuyi Mountain. Chinese Journal of Ecology, 37(2), 312-321. (In Chinese)	27.57	117.65	F	1.413	10	55.4	5	45.1947	14.8053	28	2	1.39919
344	33	Huang, Shi-De, Ye, Gong-Fu, Lin, Jie, Ruan, Hong-Hua, Jin, Chang-Sun, Li, Yuan-Yuan, & Chen, J. (2018). Effects of drying-wetting cycles on soil organic carbon mineralization along an elevation gradient in Wuyi Mountain. Chinese Journal of Ecology, 37(2), 312-321. (In Chinese)	27.57	117.65	F	1.413	10	55.4	5	39.2867	20.7133	28	3	1.18465
345	33	Huang, Shi-De, Ye, Gong-Fu, Lin, Jie, Ruan, Hong-Hua, Jin, Chang-Sun, Li, Yuan-Yuan, & Chen, J. (2018). Effects of drying-wetting cycles on soil organic carbon mineralization along an elevation gradient in Wuyi Mountain. Chinese Journal of Ecology, 37(2), 312-321. (In Chinese)	27.57	117.65	F	1.413	10	82.5	15	19.8387	40.1613	28	1	9.11729
346	33	Huang, Shi-De, Ye, Gong-Fu, Lin, Jie, Ruan, Hong-Hua, Jin, Chang-Sun, Li, Yuan-Yuan, & Chen, J. (2018). Effects of drying-wetting cycles on soil organic carbon mineralization along an elevation gradient in Wuyi Mountain. Chinese Journal of Ecology, 37(2), 312-321. (In Chinese)	27.57	117.65	F	1.413	10	82.5	15	19.8387	40.1613	28	2	6.76958
347	33	Huang, Shi-De, Ye, Gong-Fu, Lin, Jie, Ruan, Hong-Hua, Jin, Chang-Sun, Li, Yuan-Yuan, & Chen, J. (2018). Effects of drying-wetting cycles on soil organic carbon mineralization along an elevation gradient in Wuyi Mountain. Chinese Journal of Ecology, 37(2), 312-321. (In Chinese)	27.57	117.65	F	1.413	10	82.5	15	6.568	53.432	28	3	4.83771
348	33	Huang, Shi-De, Ye, Gong-Fu, Lin, Jie, Ruan, Hong-Hua, Jin, Chang-Sun, Li, Yuan-Yuan, & Chen, J. (2018). Effects of drying-wetting cycles on soil organic carbon mineralization along an elevation gradient in Wuyi Mountain. Chinese Journal of Ecology, 37(2), 312-321. (In Chinese)	27.57	117.65	F	1.413	10	66.2	15	27.372	32.628	28	1	7.39917
349	33	Huang, Shi-De, Ye, Gong-Fu, Lin, Jie, Ruan, Hong-Hua, Jin, Chang-Sun, Li, Yuan-Yuan, & Chen, J. (2018). Effects of drying-wetting cycles on soil organic carbon mineralization along an elevation gradient in Wuyi Mountain. Chinese Journal of Ecology, 37(2), 312-321. (In Chinese)	27.57	117.65	F	1.413	10	66.2	15	27.372	32.628	28	2	5.23458
350	33	Huang, Shi-De, Ye, Gong-Fu, Lin, Jie, Ruan, Hong-Hua, Jin, Chang-Sun, Li, Yuan-Yuan, & Chen, J. (2018). Effects of drying-wetting cycles on soil organic carbon mineralization along an elevation gradient in Wuyi Mountain. Chinese Journal of Ecology, 37(2), 312-321. (In Chinese)	27.57	117.65	F	1.413	10	66.2	15	10.9027	49.0973	28	3	3.89104
351	33	Huang, Shi-De, Ye, Gong-Fu, Lin, Jie, Ruan, Hong-Hua, Jin, Chang-Sun, Li, Yuan-Yuan, & Chen, J. (2018). Effects of drying-wetting cycles on soil organic carbon mineralization along an elevation gradient in Wuyi Mountain. Chinese Journal of Ecology, 37(2), 312-321. (In Chinese)	27.57	117.65	F	1.413	10	55.4	15	32.1667	27.8333	28	1	5.45333
352	33	Huang, Shi-De, Ye, Gong-Fu, Lin, Jie, Ruan, Hong-Hua, Jin, Chang-Sun, Li, Yuan-Yuan, & Chen, J. (2018). Effects of drying-wetting cycles on soil organic carbon mineralization along an elevation gradient in Wuyi Mountain. Chinese Journal of Ecology, 37(2), 312-321. (In Chinese)	27.57	117.65	F	1.413	10	55.4	15	32.1667	27.8333	28	2	4.06937
353	33	Huang, Shi-De, Ye, Gong-Fu, Lin, Jie, Ruan, Hong-Hua, Jin, Chang-Sun, Li, Yuan-Yuan, & Chen, J. (2018). Effects of drying-wetting cycles on soil organic carbon mineralization along an elevation gradient in Wuyi Mountain. Chinese Journal of Ecology, 37(2), 312-321. (In Chinese)	27.57	117.65	F	1.413	10	55.4	15	11.3627	48.6373	28	3	2.98271
354	33	Huang, Shi-De, Ye, Gong-Fu, Lin, Jie, Ruan, Hong-Hua, Jin, Chang-Sun, Li, Yuan-Yuan, & Chen, J. (2018). Effects of drying-wetting cycles on soil organic carbon mineralization along an elevation gradient in Wuyi Mountain. Chinese Journal of Ecology, 37(2), 312-321. (In Chinese)	27.57	117.65	F	1.413	10	82.5	25	17.3333	42.6667	28	1	18.1267
355	33	Huang, Shi-De, Ye, Gong-Fu, Lin, Jie, Ruan, Hong-Hua, Jin, Chang-Sun, Li, Yuan-Yuan, & Chen, J. (2018). Effects of drying-wetting cycles on soil organic carbon mineralization along an elevation gradient in Wuyi Mountain. Chinese Journal of Ecology, 37(2), 312-321. (In Chinese)	27.57	117.65	F	1.413	10	82.5	25	17.3333	42.6667	28	2	11.1075
356	33	Huang, Shi-De, Ye, Gong-Fu, Lin, Jie, Ruan, Hong-Hua, Jin, Chang-Sun, Li, Yuan-Yuan, & Chen, J. (2018). Effects of drying-wetting cycles on soil organic carbon mineralization along an elevation gradient in Wuyi Mountain. Chinese Journal of Ecology, 37(2), 312-321. (In Chinese)	27.57	117.65	F	1.413	10	82.5	25	5.33333	54.6667	28	3	7.26354
357	33	Huang, Shi-De, Ye, Gong-Fu, Lin, Jie, Ruan, Hong-Hua, Jin, Chang-Sun, Li, Yuan-Yuan, & Chen, J. (2018). Effects of drying-wetting cycles on soil organic carbon mineralization along an elevation gradient in Wuyi Mountain. Chinese Journal of Ecology, 37(2), 312-321. (In Chinese)	27.57	117.65	F	1.413	10	66.2	25	20	40	28	1	13.9602
358	33	Huang, Shi-De, Ye, Gong-Fu, Lin, Jie, Ruan, Hong-Hua, Jin, Chang-Sun, Li, Yuan-Yuan, & Chen, J. (2018). Effects of drying-wetting cycles on soil organic carbon mineralization along an elevation gradient in Wuyi Mountain. Chinese Journal of Ecology, 37(2), 312-321. (In Chinese)	27.57	117.65	F	1.413	10	66.2	25	20	40	28	2	8.49312
359	33	Huang, Shi-De, Ye, Gong-Fu, Lin, Jie, Ruan, Hong-Hua, Jin, Chang-Sun, Li, Yuan-Yuan, & Chen, J. (2018). Effects of drying-wetting cycles on soil organic carbon mineralization along an elevation gradient in Wuyi Mountain. Chinese Journal of Ecology, 37(2), 312-321. (In Chinese)	27.57	117.65	F	1.413	10	66.2	25	8	52	28	3	5.5675
360	33	Huang, Shi-De, Ye, Gong-Fu, Lin, Jie, Ruan, Hong-Hua, Jin, Chang-Sun, Li, Yuan-Yuan, & Chen, J. (2018). Effects of drying-wetting cycles on soil organic carbon mineralization along an elevation gradient in Wuyi Mountain. Chinese Journal of Ecology, 37(2), 312-321. (In Chinese)	27.57	117.65	F	1.413	10	55.4	25	29.3333	30.6667	28	1	9.84542
361	33	Huang, Shi-De, Ye, Gong-Fu, Lin, Jie, Ruan, Hong-Hua, Jin, Chang-Sun, Li, Yuan-Yuan, & Chen, J. (2018). Effects of drying-wetting cycles on soil organic carbon mineralization along an elevation gradient in Wuyi Mountain. Chinese Journal of Ecology, 37(2), 312-321. (In Chinese)	27.57	117.65	F	1.413	10	55.4	25	29.3333	30.6667	28	2	6.05354
362	33	Huang, Shi-De, Ye, Gong-Fu, Lin, Jie, Ruan, Hong-Hua, Jin, Chang-Sun, Li, Yuan-Yuan, & Chen, J. (2018). Effects of drying-wetting cycles on soil organic carbon mineralization along an elevation gradient in Wuyi Mountain. Chinese Journal of Ecology, 37(2), 312-321. (In Chinese)	27.57	117.65	F	1.413	10	55.4	25	8	52	28	3	4.09792
363	34	Meng, W.Q., Mo, Xunqiang, Hu, Beibei, He, Mengxuan, & Li, Hongyuan. (2015). Effects of drying-rewetting alternation on soil organic carbon in wetland. Chinses Journal of Soil Science (4), 910-915. (In Chinese)	39.14	117.67	G	0.3598	20	18.15	25	40	100	20	1	0.878177
364	34	Meng, W.Q., Mo, Xunqiang, Hu, Beibei, He, Mengxuan, & Li, Hongyuan. (2015). Effects of drying-rewetting alternation on soil organic carbon in wetland. Chinses Journal of Soil Science (4), 910-915. (In Chinese)	39.14	117.67	G	0.3598	20	18.15	25	40	100	20	2	0.813597
365	34	Meng, W.Q., Mo, Xunqiang, Hu, Beibei, He, Mengxuan, & Li, Hongyuan. (2015). Effects of drying-rewetting alternation on soil organic carbon in wetland. Chinses Journal of Soil Science (4), 910-915. (In Chinese)	39.14	117.67	G	0.3598	20	18.15	25	40	100	20	3	0.819171
366	34	Meng, W.Q., Mo, Xunqiang, Hu, Beibei, He, Mengxuan, & Li, Hongyuan. (2015). Effects of drying-rewetting alternation on soil organic carbon in wetland. Chinses Journal of Soil Science (4), 910-915. (In Chinese)	39.14	117.67	G	0.3598	20	18.15	25	40	100	20	4	0.719302
367	34	Meng, W.Q., Mo, Xunqiang, Hu, Beibei, He, Mengxuan, & Li, Hongyuan. (2015). Effects of drying-rewetting alternation on soil organic carbon in wetland. Chinses Journal of Soil Science (4), 910-915. (In Chinese)	39.14	117.67	G	0.3598	20	18.15	25	40	100	20	5	0.719385
368	35	Niu Baicheng, Zhao Chengyi, Feng Guanglong, & Tang Gangliang. (2016). Effects of alternate drying and rewetting on soil co2 emissions in oasis farmlands of Xinjiang Region. Bulletin of Soil and Water Conservation, 36(3), 74-80. (In Chinese)	40.62	80.75	C	0.036	20	4.0368	25	84	28	8	1	0.0253261
369	35	Niu Baicheng, Zhao Chengyi, Feng Guanglong, & Tang Gangliang. (2016). Effects of alternate drying and rewetting on soil co2 emissions in oasis farmlands of Xinjiang Region. Bulletin of Soil and Water Conservation, 36(3), 74-80. (In Chinese)	40.62	80.75	C	0.036	20	4.0368	25	84	28	8	2	0.0243169
370	35	Niu Baicheng, Zhao Chengyi, Feng Guanglong, & Tang Gangliang. (2016). Effects of alternate drying and rewetting on soil co2 emissions in oasis farmlands of Xinjiang Region. Bulletin of Soil and Water Conservation, 36(3), 74-80. (In Chinese)	40.62	80.75	C	0.036	20	4.0368	25	84	28	8	3	0.0153211
371	35	Niu Baicheng, Zhao Chengyi, Feng Guanglong, & Tang Gangliang. (2016). Effects of alternate drying and rewetting on soil co2 emissions in oasis farmlands of Xinjiang Region. Bulletin of Soil and Water Conservation, 36(3), 74-80. (In Chinese)	40.62	80.75	C	0.036	20	4.0368	25	56	56	12	1	0.0203096
372	35	Niu Baicheng, Zhao Chengyi, Feng Guanglong, & Tang Gangliang. (2016). Effects of alternate drying and rewetting on soil co2 emissions in oasis farmlands of Xinjiang Region. Bulletin of Soil and Water Conservation, 36(3), 74-80. (In Chinese)	40.62	80.75	C	0.036	20	4.0368	25	56	56	12	2	0.0185081
373	35	Niu Baicheng, Zhao Chengyi, Feng Guanglong, & Tang Gangliang. (2016). Effects of alternate drying and rewetting on soil co2 emissions in oasis farmlands of Xinjiang Region. Bulletin of Soil and Water Conservation, 36(3), 74-80. (In Chinese)	40.62	80.75	C	0.036	20	4.0368	25	56	56	12	3	0.0144631
374	36	Wang Jun, Song Xishan, & Wang Yuan. (2013). Multiple drying-wetting cycles on mineralization of organic carbon in soil. Environmental Science and Technology, 36(11), 31-35. (In Chinese)	31.12	121.16	G	0.7434	20	12.5	25	33	67	20	1	5.214
375	36	Wang Jun, Song Xishan, & Wang Yuan. (2013). Multiple drying-wetting cycles on mineralization of organic carbon in soil. Environmental Science and Technology, 36(11), 31-35. (In Chinese)	31.12	121.16	G	0.7434	20	12.5	25	33	67	20	2	3.52225
376	36	Wang Jun, Song Xishan, & Wang Yuan. (2013). Multiple drying-wetting cycles on mineralization of organic carbon in soil. Environmental Science and Technology, 36(11), 31-35. (In Chinese)	31.12	121.16	G	0.7434	20	12.5	25	33	67	20	3	2.08905
377	37	Wang Yuan, Song Xinsan, Wang Jun, Yan Denghua, Wang Yuhui, & Zhou Bin. (2014). Effects of alternating wet and dry conditions on soil carbon pools and organic carbon mineralization. Acta Pedologgica sinica, 51(2), 342-350. (In Chinese)	31.12	121.16	C	0.7434	15	16	28	30	70	20	1	1.27296
378	37	Wang Yuan, Song Xinsan, Wang Jun, Yan Denghua, Wang Yuhui, & Zhou Bin. (2014). Effects of alternating wet and dry conditions on soil carbon pools and organic carbon mineralization. Acta Pedologgica sinica, 51(2), 342-350. (In Chinese)	31.12	121.16	C	0.7434	15	16	28	30	70	26	2	0.754216
379	37	Wang Yuan, Song Xinsan, Wang Jun, Yan Denghua, Wang Yuhui, & Zhou Bin. (2014). Effects of alternating wet and dry conditions on soil carbon pools and organic carbon mineralization. Acta Pedologgica sinica, 51(2), 342-350. (In Chinese)	31.12	121.16	C	0.7434	15	16	28	30	70	20	3	0.503806

## Sheet: Field site metadata
Dataset ID	Longitude	Latitude	Land cover	Aridity index [-]	Soil moisture sensor depth (cm)	Soil temperature sensor depth (cm)	Soil organic carbon content (g kg-1)	Sand (%)	Silt (%)	Clay (%)	Bulk density (g cm-3)	Additional data source	DOI
d20190430_DESAI	-90.0799	45.8059	Deciduous broadleaf forest	0.9236	4	8	50	54	33	13	1.55	Cook et al. (2004)	https://doi.org/10.1016/j.agrformet.2004.06.008
d20190504_SAVAGE_hf006-05	-72.17	42.54	Deciduous broadleaf forest	1.0976	10	10	58.6				0.83	Compton and Boone (2000)	https://doi.org/10.1890/0012-9658(2000)081[2314:LTIOAO]2.0.CO;2
d20190517_MAURITZ	-117.164	33.4416	Open shrubland	0.1797	5	5	33	26	55	19	1.5	Pérez Castro et al. (2019)	https://doi.org/10.1038/s41396-019-0389-9
d20190610_SIHI_H2	-68.7402	45.2041	Evergreen needleleaf forest	1.1181	10	10	470				0.65	Fernandez et al. (1993)	https://doi.org/10.4141/cjss93-034
d20190617_SCOTT_WKG	-109.942	31.7365	Grassland	0.1682	5	5	11	67	16	17	1.55	Emmerich (2004)	https://doi.org/10.1016/S0168-1923(02)00231-9
d20200417_ARAIN_TP39	-80.3574	42.7102	Evergreen needleleaf forest	0.9959	5	5	15	98	1	1	1.65	Peichl et al. (2010)	https://doi.org/10.1016/j.agrformet.2010.04.008

## Sheet: Field data
Dataset ID	Chamber ID	Rewetting time	Dryness (%)	Rewetting intensity (%)	Rewetting temperature (°C)	Respiration rate (μmol C m−2 h−1)
d20190430_DESAI	4	2011-09-21 16:29:00	31.2	4.2	10.5912	2740.82
d20190430_DESAI	4	2011-09-26 20:29:00	33.1	5.2	12.6862	3949.79
d20190430_DESAI	4	2011-09-29 07:29:00	36.2	4.6	11.4147	2299.18
d20190430_DESAI	4	2011-10-13 01:29:00	31.6	14.4	12.9728	12724.7
d20190430_DESAI	4	2011-10-25 21:29:00	34.2	7	6.41413	2900.38
d20190430_DESAI	4	2011-11-02 03:59:00	36.2	3.1	5.88655	4044.43
d20190430_DESAI	4	2011-11-26 06:59:00	37.6	6.4	4.44843	3432.12
d20190430_DESAI	4	2012-03-22 02:59:00	39.6	3.2	10.4143	5504.33
d20190430_DESAI	4	2012-03-30 15:59:00	37.7	1.6	4.85002	4716.37
d20190430_DESAI	4	2012-04-18 08:59:00	38.3	6.7	6.3611	4562.25
d20190430_DESAI	4	2012-04-25 17:59:00	36.3	2.2	6.9407	4996.17
d20190430_DESAI	4	2012-04-30 05:59:00	36.5	7	8.11341	4489.71
d20190430_DESAI	4	2012-05-20 14:59:00	36.6	7.7	13.2884	6728.32
d20190430_DESAI	4	2012-05-26 18:59:00	39	8.3	15.0115	6885.75
d20190430_DESAI	4	2012-06-08 13:59:00	37.2	2.6	16.8913	4447.57
d20190430_DESAI	4	2012-06-14 15:59:00	36.7	10.4	14.8989	8839.53
d20190430_DESAI	4	2012-06-22 16:59:00	41.2	8.4	15.7423	5782.19
d20190430_DESAI	4	2012-07-03 03:59:00	39.9	9.3	21.2719	12477.3
d20190430_DESAI	4	2012-07-06 17:59:00	40.1	8.4	19.6607	14842.6
d20190430_DESAI	4	2012-07-18 18:59:00	39.3	6.9	18.6139	5519.45
d20190430_DESAI	4	2012-07-27 00:59:00	41.8	7.6	18.4449	13822.8
d20190430_DESAI	4	2012-08-04 07:59:00	38.8	7.4	18.3487	7801.6
d20190430_DESAI	4	2012-08-08 22:59:00	38.6	8.2	16.0034	5627.49
d20190430_DESAI	4	2012-08-13 17:59:00	39	6.8	16.5971	8107.02
d20190430_DESAI	4	2012-08-18 21:59:00	39.2	1.2	14.584	4872
d20190430_DESAI	4	2012-08-23 12:59:00	38.6	2	18.0563	4274.05
d20190430_DESAI	4	2012-09-08 18:59:00	39.1	1.6	13.8193	4303.57
d20190430_DESAI	4	2012-09-17 11:59:00	36.4	2.3	11.1575	4601.05
d20190430_DESAI	4	2012-09-21 06:59:00	40.7	3.6	9.04319	3526.47
d20190430_DESAI	4	2012-10-06 14:59:00	34.2	1.1	6.40304	3275.25
d20190430_DESAI	4	2012-10-09 03:59:00	34.8	5.2	6.49447	3185.2
d20190430_DESAI	4	2012-10-13 09:59:00	36.8	1.3	6.24745	2797.28
d20190430_DESAI	4	2012-10-18 02:59:00	37.1	8.4	8.77885	4178.25
d20190430_DESAI	4	2012-10-25 00:59:00	40.4	8.4	9.43609	7794
d20190430_DESAI	4	2012-11-07 03:59:00	37.3	3.4	3.05258	2737.5
d20190430_DESAI	4	2012-11-10 13:59:00	38.7	8.1	5.60521	3107.25
d20190504_SAVAGE_hf006-05	1	2012-06-02 04:55:00	16	23	13	245.594
d20190504_SAVAGE_hf006-05	1	2012-06-06 01:55:00	22	5	11.8824	274.576
d20190504_SAVAGE_hf006-05	1	2012-06-25 09:55:00	10	3	15.1918	494.289
d20190504_SAVAGE_hf006-05	1	2012-07-15 20:25:00	4	4	20.1924	615.463
d20190504_SAVAGE_hf006-05	1	2012-07-24 03:37:00	4	4	18.2622	513.066
d20190504_SAVAGE_hf006-05	1	2012-07-28 12:57:00	8	7	18.154	646.606
d20190504_SAVAGE_hf006-05	1	2012-08-05 16:45:00	4	8	20.1078	549.819
d20190504_SAVAGE_hf006-05	1	2012-08-10 16:30:00	5	20	20.281	628.31
d20190504_SAVAGE_hf006-05	1	2012-08-15 06:00:00	12	16	19.2437	655.049
d20190504_SAVAGE_hf006-05	1	2012-08-18 05:15:00	12	3	17.58	626.499
d20190504_SAVAGE_hf006-05	1	2012-08-28 05:15:00	5	6	17.9444	571.733
d20190504_SAVAGE_hf006-05	1	2012-09-08	11	13	18.3969	565.517
d20190504_SAVAGE_hf006-05	1	2012-09-18 12:45:00	5	21	15.1406	395.917
d20190504_SAVAGE_hf006-05	1	2012-09-28 07:30:00	9	18	11.6479	298.17
d20190504_SAVAGE_hf006-05	1	2012-10-02 16:30:00	16	3	13.7615	241.374
d20190504_SAVAGE_hf006-05	1	2012-10-15 18:45:00	19	9	10.6156	190.147
d20190504_SAVAGE_hf006-05	1	2012-10-19 09:00:00	17	15	12.746	244.659
d20190504_SAVAGE_hf006-05	1	2012-10-29 10:30:00	16	18	12.1587	146.908
d20190504_SAVAGE_hf006-05	1	2013-04-19 23:00:00	23	8	8.0898	78.9647
d20190504_SAVAGE_hf006-05	1	2013-05-22 00:15:00	20	16	14.1596	219.08
d20190504_SAVAGE_hf006-05	1	2013-05-29 04:45:00	24	12	14.4707	260.861
d20190504_SAVAGE_hf006-05	1	2013-06-07 01:30:00	22	15	12.5143	276.288
d20190504_SAVAGE_hf006-05	1	2013-06-10 17:15:00	25	9	13.4608	318.279
d20190504_SAVAGE_hf006-05	1	2013-06-13 12:00:00	27	7	12.2467	212.861
d20190504_SAVAGE_hf006-05	1	2013-06-17 16:30:00	25	4	14.3828	305.67
d20190504_SAVAGE_hf006-05	1	2013-06-28 01:30:00	22	14	18.1317	365.639
d20190504_SAVAGE_hf006-05	1	2013-07-01 12:00:00	23	8	19.4532	367.754
d20190504_SAVAGE_hf006-05	1	2013-07-10 02:15:00	19	3	19.8815	517.021
d20190504_SAVAGE_hf006-05	1	2013-08-01 16:15:00	14	19	17.6419	375.941
d20190504_SAVAGE_hf006-05	1	2013-08-09 07:15:00	18	26	19.0413	435.324
d20190504_SAVAGE_hf006-05	1	2013-08-13 12:30:00	21	5	16.4679	376.473
d20190504_SAVAGE_hf006-05	1	2013-08-26 23:00:00	11	8	19.0207	363.113
d20190504_SAVAGE_hf006-05	1	2013-08-29 01:15:00	17	9	17.7098	339.054
d20190504_SAVAGE_hf006-05	1	2013-08-31 05:00:00	19	15	19.3966	351.341
d20190504_SAVAGE_hf006-05	1	2013-09-11 21:30:00	18	17	19.1561	352.307
d20190504_SAVAGE_hf006-05	1	2013-10-18 01:15:00	18	6	12.1032	176.271
d20190504_SAVAGE_hf006-05	1	2013-10-31 14:45:00	18	9	10.0985	115.69
d20190504_SAVAGE_hf006-05	1	2014-05-17 02:45:00	25	15	13.9738	211.643
d20190504_SAVAGE_hf006-05	1	2014-05-22 11:45:00	26	3	11.9297	225.013
d20190504_SAVAGE_hf006-05	1	2014-05-27 22:15:00	25	3	10.6953	194.528
d20190504_SAVAGE_hf006-05	1	2014-06-05 08:00:00	24	3	13.2048	314.29
d20190504_SAVAGE_hf006-05	1	2014-06-09 17:45:00	22	3	14.4071	372.274
d20190504_SAVAGE_hf006-05	1	2014-06-18 02:45:00	20	6	16.2483	464.919
d20190504_SAVAGE_hf006-05	1	2014-06-25 23:00:00	16	14	16.8226	496.728
d20190504_SAVAGE_hf006-05	1	2014-07-03 21:00:00	25	5	17.6127	528.622
d20190504_SAVAGE_hf006-05	1	2014-07-07 20:15:00	22	4	18.6623	736.398
d20190504_SAVAGE_hf006-05	1	2014-07-09 21:45:00	23	13	17.6774	625.79
d20190504_SAVAGE_hf006-05	1	2014-07-15 23:15:00	22	12	18.4213	699.578
d20190504_SAVAGE_hf006-05	1	2014-07-23 21:45:00	18	6	18.1889	631.489
d20190504_SAVAGE_hf006-05	1	2014-07-27 10:30:00	19	24	17.8516	669.246
d20190504_SAVAGE_hf006-05	1	2014-08-13 07:30:00	11	28	16.6	500.234
d20190504_SAVAGE_hf006-05	1	2014-08-21 20:15:00	17	4	15.8017	567.585
d20190504_SAVAGE_hf006-05	1	2014-09-02 18:00:00	9	8	18.6	617.94
d20190504_SAVAGE_hf006-05	1	2014-09-13 16:15:00	11	12	12.7508	368.557
d20190504_SAVAGE_hf006-05	1	2014-09-21 05:00:00	10	6	14.3692	412.74
d20190504_SAVAGE_hf006-05	1	2014-10-01 14:45:00	7	13	12.8815	291.37
d20190504_SAVAGE_hf006-05	1	2014-10-04 14:00:00	15	20	11.5692	268.342
d20190504_SAVAGE_hf006-05	1	2014-10-08 05:00:00	16	6	12.2172	281.354
d20190504_SAVAGE_hf006-05	1	2014-10-11 09:30:00	15	6	9.61875	207.081
d20190504_SAVAGE_hf006-05	1	2014-10-16 02:00:00	15	24	15.6767	394.499
d20190504_SAVAGE_hf006-05	1	2014-10-22 18:30:00	20	21	9.6125	79.8733
d20190504_SAVAGE_hf006-05	1	2014-11-06 16:15:00	21	3	7.51094	126.991
d20190504_SAVAGE_hf006-05	3	2012-06-02 05:03:00	16	23	12.9768	292.024
d20190504_SAVAGE_hf006-05	3	2012-06-06 01:33:00	22	5	11.9158	285.445
d20190504_SAVAGE_hf006-05	3	2012-06-25 09:33:00	10	3	15.2055	578.297
d20190504_SAVAGE_hf006-05	3	2012-07-15 20:03:00	4	4	20.1391	1225.59
d20190504_SAVAGE_hf006-05	3	2012-07-24 03:47:00	4	4	18.3031	1176.05
d20190504_SAVAGE_hf006-05	3	2012-07-28 13:53:00	8	7	18.119	1363.08
d20190504_SAVAGE_hf006-05	3	2012-08-05 16:10:00	4	8	20.0875	1161.66
d20190504_SAVAGE_hf006-05	3	2012-08-10 16:40:00	5	23	20.2946	1152.34
d20190504_SAVAGE_hf006-05	3	2012-08-15 05:25:00	12	16	19.2563	1192.86
d20190504_SAVAGE_hf006-05	3	2012-08-18 05:25:00	12	3	17.5306	1136.44
d20190504_SAVAGE_hf006-05	3	2012-08-28 04:40:00	5	6	17.9849	1096.11
d20190504_SAVAGE_hf006-05	3	2012-09-07 23:25:00	11	13	18.3698	1068.87
d20190504_SAVAGE_hf006-05	3	2012-09-18 12:55:00	5	21	15.0859	700.69
d20190504_SAVAGE_hf006-05	3	2012-09-28 06:55:00	9	17	11.649	473.59
d20190504_SAVAGE_hf006-05	3	2012-10-02 16:40:00	16	3	13.78	480.617
d20190504_SAVAGE_hf006-05	3	2012-10-15 18:10:00	18	11	10.6453	275.212
d20190504_SAVAGE_hf006-05	3	2012-10-19 08:25:00	17	15	12.7397	346.153
d20190504_SAVAGE_hf006-05	3	2012-10-29 10:40:00	16	17	12.2115	151.117
d20190504_SAVAGE_hf006-05	3	2013-04-19 22:25:00	23	8	8.125	97.5705
d20190504_SAVAGE_hf006-05	3	2013-05-23 07:55:00	26	9	14.3755	264.31
d20190504_SAVAGE_hf006-05	3	2013-05-29 04:10:00	24	12	14.3552	337.794
d20190504_SAVAGE_hf006-05	3	2013-06-07 00:55:00	22	11	12.7027	284.708
d20190504_SAVAGE_hf006-05	3	2013-06-10 16:40:00	25	8	13.4426	295.44
d20190504_SAVAGE_hf006-05	3	2013-06-13 12:10:00	27	7	12.2031	246.62
d20190504_SAVAGE_hf006-05	3	2013-06-17 16:40:00	25	4	14.3938	324.891
d20190504_SAVAGE_hf006-05	3	2013-06-28 01:40:00	22	14	18.2	386.312
d20190504_SAVAGE_hf006-05	3	2013-07-01 12:10:00	23	9	19.4656	424.577
d20190504_SAVAGE_hf006-05	3	2013-07-09 21:55:00	19	3	19.8625	480.541
d20190504_SAVAGE_hf006-05	3	2013-08-01 15:40:00	14	20	17.6215	458.931
d20190504_SAVAGE_hf006-05	3	2013-08-09 05:10:00	18	25	19.1034	471.091
d20190504_SAVAGE_hf006-05	3	2013-08-13 11:55:00	21	5	16.7196	348.412
d20190504_SAVAGE_hf006-05	3	2013-08-26 20:55:00	11	8	19.037	470.777
d20190504_SAVAGE_hf006-05	3	2013-08-29 00:40:00	17	9	17.6667	446.427
d20190504_SAVAGE_hf006-05	3	2013-08-31 05:10:00	19	16	19.4623	500.786
d20190504_SAVAGE_hf006-05	3	2013-09-11 21:40:00	18	17	18.9531	571.91
d20190504_SAVAGE_hf006-05	3	2013-10-18 01:25:00	18	5	12.24	209.887
d20190504_SAVAGE_hf006-05	3	2013-10-31 08:55:00	18	9	10.4387	143.111
d20190504_SAVAGE_hf006-05	3	2014-05-17 02:10:00	25	16	13.9769	355.057
d20190504_SAVAGE_hf006-05	3	2014-05-22 11:55:00	26	3	11.94	419.609
d20190504_SAVAGE_hf006-05	3	2014-05-27 22:25:00	25	3	10.6172	360.775
d20190504_SAVAGE_hf006-05	3	2014-06-09 16:25:00	22	3	14.2667	704.94
d20190504_SAVAGE_hf006-05	3	2014-06-18 01:25:00	20	7	16.2902	683.298
d20190504_SAVAGE_hf006-05	3	2014-06-25 22:25:00	16	12	16.7656	860.426
d20190504_SAVAGE_hf006-05	3	2014-07-03 20:25:00	25	5	17.7	536.364
d20190504_SAVAGE_hf006-05	3	2014-07-07 20:25:00	22	4	18.6905	696.355
d20190504_SAVAGE_hf006-05	3	2014-07-09 21:10:00	23	15	17.7274	635.662
d20190504_SAVAGE_hf006-05	3	2014-07-15 23:25:00	22	11	18.3883	743.587
d20190504_SAVAGE_hf006-05	3	2014-07-23 20:25:00	18	6	18.2475	746.068
d20190504_SAVAGE_hf006-05	3	2014-07-27 10:40:00	19	22	17.871	753.093
d20190504_SAVAGE_hf006-05	3	2014-08-21 19:40:00	17	4	15.7887	606.478
d20190504_SAVAGE_hf006-05	3	2014-09-13 15:40:00	11	12	12.7532	550.749
d20190504_SAVAGE_hf006-05	3	2014-09-21 05:10:00	10	6	14.3508	639.555
d20190504_SAVAGE_hf006-05	3	2014-10-01 14:10:00	7	13	12.8844	407.936
d20190504_SAVAGE_hf006-05	3	2014-10-04 13:25:00	15	18	11.5766	381.837
d20190504_SAVAGE_hf006-05	3	2014-10-08 05:10:00	16	6	12.1966	388.113
d20190504_SAVAGE_hf006-05	3	2014-10-11 09:40:00	15	6	9.60154	333.632
d20190504_SAVAGE_hf006-05	3	2014-10-16 01:25:00	15	25	15.5353	444.435
d20190504_SAVAGE_hf006-05	3	2014-10-22 14:55:00	20	22	9.58696	100.728
d20190504_SAVAGE_hf006-05	3	2014-11-06 15:40:00	21	3	7.50769	139.272
d20190504_SAVAGE_hf006-05	5	2012-06-25 09:40:00	10	3	15.2043	741.743
d20190504_SAVAGE_hf006-05	5	2012-07-15 20:10:00	4	4	20.2066	884.934
d20190504_SAVAGE_hf006-05	5	2012-07-24 03:17:00	4	4	18.303	759.994
d20190504_SAVAGE_hf006-05	5	2012-07-28 12:34:00	8	7	18.0788	984.455
d20190504_SAVAGE_hf006-05	5	2012-08-05 16:20:00	4	8	19.9787	856.944
d20190504_SAVAGE_hf006-05	5	2012-08-10 16:05:00	5	21	20.2214	1021.59
d20190504_SAVAGE_hf006-05	5	2012-08-15 05:35:00	12	16	19.2274	1004.09
d20190504_SAVAGE_hf006-05	5	2012-08-18 05:35:00	12	3	17.5468	906.069
d20190504_SAVAGE_hf006-05	5	2012-08-28 04:50:00	5	6	17.9509	788.654
d20190504_SAVAGE_hf006-05	5	2012-09-07 22:05:00	11	13	18.4683	862.285
d20190504_SAVAGE_hf006-05	5	2012-09-18 13:05:00	5	21	15.1048	546.697
d20190504_SAVAGE_hf006-05	5	2012-09-28 07:05:00	9	16	11.6711	478.295
d20190504_SAVAGE_hf006-05	5	2012-10-02 16:50:00	16	3	13.777	384.323
d20190504_SAVAGE_hf006-05	5	2012-10-15 19:05:00	19	9	10.5538	304.502
d20190504_SAVAGE_hf006-05	5	2012-10-19 08:35:00	17	15	12.7476	366.427
d20190504_SAVAGE_hf006-05	5	2012-10-29 10:50:00	16	17	12.1855	180.708
d20190504_SAVAGE_hf006-05	5	2013-04-19 22:35:00	23	8	8.07917	140.412
d20190504_SAVAGE_hf006-05	5	2013-05-23 08:05:00	26	10	14.3585	363.551
d20190504_SAVAGE_hf006-05	5	2013-05-29 04:20:00	24	12	14.4169	411.429
d20190504_SAVAGE_hf006-05	5	2013-06-07 01:05:00	22	15	12.4349	375.78
d20190504_SAVAGE_hf006-05	5	2013-06-10 16:50:00	25	9	13.4589	397.369
d20190504_SAVAGE_hf006-05	5	2013-06-13 12:20:00	27	7	12.2062	353.195
d20190504_SAVAGE_hf006-05	5	2013-06-17 16:50:00	26	3	14.3877	485.221
d20190504_SAVAGE_hf006-05	5	2013-06-28 01:05:00	22	14	18.1016	693.794
d20190504_SAVAGE_hf006-05	5	2013-07-01 11:35:00	23	9	19.4431	820.804
d20190504_SAVAGE_hf006-05	5	2013-07-10 02:35:00	19	3	19.8846	872.646
d20190504_SAVAGE_hf006-05	5	2013-08-01 15:50:00	14	20	17.6169	663.317
d20190504_SAVAGE_hf006-05	5	2013-08-09 06:50:00	18	26	18.9862	694.44
d20190504_SAVAGE_hf006-05	5	2013-08-13 12:05:00	21	5	16.4536	559.245
d20190504_SAVAGE_hf006-05	5	2013-08-26 22:35:00	11	8	18.9746	538.775
d20190504_SAVAGE_hf006-05	5	2013-08-29 00:50:00	17	9	17.7113	561.605
d20190504_SAVAGE_hf006-05	5	2013-08-31 05:20:00	19	20	19.4462	742.833
d20190504_SAVAGE_hf006-05	5	2013-09-11 21:50:00	18	16	18.9431	661.453
d20190504_SAVAGE_hf006-05	5	2013-10-18 01:35:00	18	6	12.0785	314.421
d20190504_SAVAGE_hf006-05	5	2013-10-31 14:20:00	18	9	10.0698	202.675
d20190504_SAVAGE_hf006-05	5	2014-05-17 02:20:00	25	16	13.9754	332.6
d20190504_SAVAGE_hf006-05	5	2014-05-22 12:05:00	26	3	11.919	338.849
d20190504_SAVAGE_hf006-05	5	2014-05-27 21:50:00	25	3	10.6922	275.325
d20190504_SAVAGE_hf006-05	5	2014-06-05 08:20:00	24	3	13.1767	434.523
d20190504_SAVAGE_hf006-05	5	2014-06-09 17:20:00	22	3	14.2848	485.201
d20190504_SAVAGE_hf006-05	5	2014-06-18 02:20:00	20	6	16.2407	630.941
d20190504_SAVAGE_hf006-05	5	2014-06-25 22:35:00	16	13	16.7875	750.076
d20190504_SAVAGE_hf006-05	5	2014-07-03 20:35:00	25	5	17.5968	663.783
d20190504_SAVAGE_hf006-05	5	2014-07-07 19:50:00	22	4	18.6672	873.272
d20190504_SAVAGE_hf006-05	5	2014-07-09 21:20:00	23	14	17.6885	736.843
d20190504_SAVAGE_hf006-05	5	2014-07-15 23:35:00	22	12	18.3918	892.795
d20190504_SAVAGE_hf006-05	5	2014-07-23 21:20:00	18	6	18.2164	777.063
d20190504_SAVAGE_hf006-05	5	2014-07-27 10:50:00	19	27	17.8562	800.74
d20190504_SAVAGE_hf006-05	5	2014-08-13 07:05:00	11	31	16.6143	626.824
d20190504_SAVAGE_hf006-05	5	2014-08-21 19:50:00	17	4	15.7954	678.792
d20190504_SAVAGE_hf006-05	5	2014-09-02 18:20:00	9	8	18.5754	701.422
d20190504_SAVAGE_hf006-05	5	2014-09-13 15:50:00	11	12	12.7708	438.16
d20190504_SAVAGE_hf006-05	5	2014-09-21 04:35:00	10	6	14.3723	537.472
d20190504_SAVAGE_hf006-05	5	2014-10-01 14:20:00	7	13	12.8815	385.369
d20190504_SAVAGE_hf006-05	5	2014-10-04 13:35:00	15	20	11.58	378.42
d20190504_SAVAGE_hf006-05	5	2014-10-08 05:20:00	16	6	12.1914	354.779
d20190504_SAVAGE_hf006-05	5	2014-10-11 09:50:00	15	6	9.60154	280.172
d20190504_SAVAGE_hf006-05	5	2014-10-16 01:35:00	15	25	15.5816	449.29
d20190504_SAVAGE_hf006-05	5	2014-10-22 17:20:00	20	22	9.58409	100.027
d20190504_SAVAGE_hf006-05	5	2014-11-06 15:50:00	21	3	7.49688	198.273
d20190504_SAVAGE_hf006-05	7	2012-06-25 09:48:00	10	3	15.1356	528.507
d20190504_SAVAGE_hf006-05	7	2012-07-15 20:18:00	4	4	20.1984	585.281
d20190504_SAVAGE_hf006-05	7	2012-07-24 04:07:00	4	4	18.2342	546.793
d20190504_SAVAGE_hf006-05	7	2012-07-28 13:30:00	8	7	18.1111	841.833
d20190504_SAVAGE_hf006-05	7	2012-08-05 16:30:00	4	8	20.1	652.33
d20190504_SAVAGE_hf006-05	7	2012-08-18 05:00:00	12	3	17.58	626.342
d20190504_SAVAGE_hf006-05	7	2012-08-28 05:00:00	5	6	17.9389	543.668
d20190504_SAVAGE_hf006-05	7	2012-09-07 23:45:00	11	13	18.3969	563.703
d20190504_SAVAGE_hf006-05	7	2012-09-18 12:30:00	5	21	15.1431	388.383
d20190504_SAVAGE_hf006-05	7	2012-09-28 07:15:00	9	16	11.6851	276.716
d20190504_SAVAGE_hf006-05	7	2012-10-02 16:15:00	16	3	13.7615	305.705
d20190504_SAVAGE_hf006-05	7	2012-10-15 18:30:00	19	9	10.5785	198.548
d20190504_SAVAGE_hf006-05	7	2012-10-19 08:45:00	17	15	12.746	276.76
d20190504_SAVAGE_hf006-05	7	2012-10-29 10:15:00	16	18	12.1556	147.519
d20190504_SAVAGE_hf006-05	7	2013-04-19 22:45:00	23	8	8.0898	94.7528
d20190504_SAVAGE_hf006-05	7	2013-05-22	20	16	14.1623	312.91
d20190504_SAVAGE_hf006-05	7	2013-05-29 04:30:00	24	11	14.3474	348.46
d20190504_SAVAGE_hf006-05	7	2013-06-07 01:15:00	22	15	12.4548	390.728
d20190504_SAVAGE_hf006-05	7	2013-06-10 17:00:00	25	9	13.4264	360.777
d20190504_SAVAGE_hf006-05	7	2013-06-13 11:45:00	27	7	12.1923	274.789
d20190504_SAVAGE_hf006-05	7	2013-06-17 13:15:00	26	3	14.3817	353.817
d20190504_SAVAGE_hf006-05	7	2013-06-28 01:15:00	22	14	18.1079	469.43
d20190504_SAVAGE_hf006-05	7	2013-07-10 02:00:00	19	3	19.8766	520.153
d20190504_SAVAGE_hf006-05	7	2013-08-01 16:00:00	14	19	17.62	432.863
d20190504_SAVAGE_hf006-05	7	2013-08-09 07:00:00	18	26	18.9828	467.263
d20190504_SAVAGE_hf006-05	7	2013-08-13 12:15:00	21	5	16.4091	390.938
d20190504_SAVAGE_hf006-05	7	2013-08-26 22:45:00	11	8	19.0259	461.101
d20190504_SAVAGE_hf006-05	7	2013-08-29 01:00:00	17	9	17.878	493.445
d20190504_SAVAGE_hf006-05	7	2013-09-01 02:30:00	19	22	19.8625	493.723
d20190504_SAVAGE_hf006-05	7	2013-09-11 21:15:00	18	17	18.9815	445.559
d20190504_SAVAGE_hf006-05	7	2013-10-18 01:00:00	18	6	12.1	218.673
d20190504_SAVAGE_hf006-05	7	2013-10-31 14:30:00	18	9	10.0985	171.986
d20190504_SAVAGE_hf006-05	7	2014-05-17 02:30:00	25	15	13.9738	191.99
d20190504_SAVAGE_hf006-05	7	2014-05-22 11:30:00	26	3	11.9154	215.017
d20190504_SAVAGE_hf006-05	7	2014-05-27 22:00:00	25	3	10.6875	189.131
d20190504_SAVAGE_hf006-05	7	2014-06-05 07:45:00	24	3	13.2048	280.028
d20190504_SAVAGE_hf006-05	7	2014-06-09 17:30:00	22	3	14.3911	311.909
d20190504_SAVAGE_hf006-05	7	2014-06-18 02:30:00	20	6	16.2538	357.646
d20190504_SAVAGE_hf006-05	7	2014-06-25 22:45:00	16	14	16.8443	430.389
d20190504_SAVAGE_hf006-05	7	2014-07-03 20:45:00	25	5	17.6	476.074
d20190504_SAVAGE_hf006-05	7	2014-07-07 20:00:00	22	4	18.6714	534.806
d20190504_SAVAGE_hf006-05	7	2014-07-09 21:30:00	23	13	17.6631	502.603
d20190504_SAVAGE_hf006-05	7	2014-07-15 23:00:00	22	12	18.45	548.558
d20190504_SAVAGE_hf006-05	7	2014-07-23 21:30:00	18	6	18.2	529.069
d20190504_SAVAGE_hf006-05	7	2014-07-27 10:15:00	19	24	17.86	541.393
d20190504_SAVAGE_hf006-05	7	2014-08-13 07:15:00	11	28	16.6292	422.692
d20190504_SAVAGE_hf006-05	7	2014-08-21 20:00:00	17	4	15.8015	422.531
d20190504_SAVAGE_hf006-05	7	2014-09-02 17:45:00	9	8	18.6	465.736
d20190504_SAVAGE_hf006-05	7	2014-09-13 16:00:00	11	12	12.7508	286.691
d20190504_SAVAGE_hf006-05	7	2014-09-21 04:45:00	10	6	14.3692	338.316
d20190504_SAVAGE_hf006-05	7	2014-10-01 14:30:00	7	13	12.8705	264.173
d20190504_SAVAGE_hf006-05	7	2014-10-04 13:45:00	15	20	11.5692	213.937
d20190504_SAVAGE_hf006-05	7	2014-10-08 04:45:00	16	6	12.2316	226.515
d20190504_SAVAGE_hf006-05	7	2014-10-11 09:15:00	15	6	9.61231	189.377
d20190504_SAVAGE_hf006-05	7	2014-10-16 01:45:00	15	24	15.6174	326.033
d20190504_SAVAGE_hf006-05	7	2014-10-22 18:15:00	20	19	9.6566	121.231
d20190504_SAVAGE_hf006-05	7	2014-11-06 16:00:00	21	3	7.48226	145.84
d20190517_MAURITZ	1	2010-02-19 20:59:00	13.26	9.44	12.5389	3429.69
d20190517_MAURITZ	1	2010-03-06 20:59:00	18.12	9.91	11.3408	2925.69
d20190517_MAURITZ	1	2010-04-04 20:59:00	9.97	10.92	14.1352	4500
d20190517_MAURITZ	1	2010-04-07 20:59:00	12.87	8.13	17.561	4405.85
d20190517_MAURITZ	1	2010-04-11 20:59:00	18	12.72	14.5353	4741.5
d20190517_MAURITZ	1	2010-04-21 20:59:00	22.81	8.04	11.8054	3562.62
d20190517_MAURITZ	1	2010-10-19 06:59:00	9.6381	18.8616	16.2262	3729.6
d20190517_MAURITZ	1	2010-10-30 03:59:00	14.8386	12.229	14.6041	2968.62
d20190517_MAURITZ	1	2010-11-20 01:59:00	10.4438	20.1859	11.0217	1668.46
d20190517_MAURITZ	1	2010-11-27 20:59:00	17.1681	7.90219	8.018	1516.91
d20190517_MAURITZ	1	2010-12-17 08:59:00	20.8864	11.6527	12.4127	1357.5
d20190517_MAURITZ	1	2011-03-20 16:59:00	10.6438	19.2764	10.9827	2061
d20190517_MAURITZ	1	2011-03-25 00:59:00	23.9289	5.44861	11.3612	2293.5
d20190517_MAURITZ	1	2011-04-08 20:59:00	15.1503	5.79211	11.6352	3170.77
d20190517_MAURITZ	1	2011-05-17 08:59:00	7.23649	12.4582	13.2904	3539.08
d20190517_MAURITZ	1	2011-05-29 01:59:00	7.65366	5.41049	16.0017	2657.08
d20190517_MAURITZ	3	2010-02-19 20:59:00	22.21	12.26	12.6877	2327.54
d20190517_MAURITZ	3	2010-02-27 01:59:00	28.12	7.75	12.4935	1929.27
d20190517_MAURITZ	3	2010-03-06 13:59:00	26.03	6.51	12.1634	1561.09
d20190517_MAURITZ	3	2010-04-04 20:59:00	18.12	8.51	15.0412	2943.69
d20190517_MAURITZ	3	2010-04-11 20:59:00	18	12.72	15.8439	3466.5
d20190517_MAURITZ	3	2010-04-21 20:59:00	22.81	8.04	13.6502	3068.31
d20190517_MAURITZ	3	2010-10-06 06:59:00	11.0421	6.12592	19.0318	2603.45
d20190517_MAURITZ	3	2010-10-19 01:59:00	11.8974	19.3399	17.0735	3285.82
d20190517_MAURITZ	3	2010-10-30 03:59:00	19.1174	11.0707	15.3255	2272.15
d20190517_MAURITZ	3	2010-11-20 01:59:00	14.7761	17.2662	11.9135	1350
d20190517_MAURITZ	3	2010-11-27 20:59:00	20.6051	6.60825	8.67911	1056
d20190517_MAURITZ	3	2010-12-17 08:59:00	25.8813	6.65778	12.8217	1255.09
d20190517_MAURITZ	3	2011-03-20 16:59:00	15.8305	17.6749	12.1132	2190
d20190517_MAURITZ	3	2011-04-08 20:59:00	20.2656	6.21338	13.5773	3159.69
d20190517_MAURITZ	3	2011-05-29 01:59:00	10.9096	5.71493	21.5459	2961
d20190517_MAURITZ	5	2010-02-19 20:59:00	22.65	10.42	12.332	3114
d20190517_MAURITZ	5	2010-04-04 20:59:00	18.24	7.74	14.3968	3453.23
d20190517_MAURITZ	5	2010-04-11 20:59:00	18	12.72	14.6982	2608.5
d20190517_MAURITZ	5	2010-04-21 20:59:00	22.81	8.04	12.2312	2207.08
d20190517_MAURITZ	5	2010-10-19 01:59:00	13.3846	20.629	16.0586	3273
d20190517_MAURITZ	5	2010-10-30 03:59:00	19.3491	8.77428	15.1845	3464.31
d20190517_MAURITZ	5	2010-11-20 01:59:00	12.6775	20.9854	11.0705	1740
d20190517_MAURITZ	5	2010-11-27 20:59:00	23.6123	5.62809	7.85654	1924.62
d20190517_MAURITZ	5	2010-12-17 08:59:00	25.6295	9.55344	11.9973	1319.54
d20190517_MAURITZ	5	2011-04-07 16:59:00	19.8666	7.54025	12.0725	3173.54
d20190517_MAURITZ	5	2011-05-17 08:59:00	11.1744	16.7117	13.331	19559.1
d20190517_MAURITZ	5	2011-05-29 01:59:00	12.4833	5.87432	16.2272	5922
d20190517_MAURITZ	7	2010-02-19 20:59:00	23.98	10.49	12.7378	2353.85
d20190517_MAURITZ	7	2010-02-27 01:59:00	28.08	7.79	12.5154	1952.18
d20190517_MAURITZ	7	2010-04-04 20:59:00	16.34	8.9	15.5925	3170.77
d20190517_MAURITZ	7	2010-04-11 20:59:00	18	12.72	16.2579	3117
d20190517_MAURITZ	7	2010-04-21 20:59:00	22.81	8.04	14.1163	2982
d20190517_MAURITZ	7	2010-10-19 01:59:00	12.9999	19.209	16.8352	4145.4
d20190517_MAURITZ	7	2010-10-30 03:59:00	23.4532	7.08871	15.5377	2265.23
d20190517_MAURITZ	7	2010-11-20 01:59:00	17.5276	16.6019	11.5287	1405.64
d20190517_MAURITZ	7	2010-12-16 01:59:00	20.8864	13.6629	11.8508	1441.38
d20190517_MAURITZ	7	2011-03-20 16:59:00	20.9984	13.361	11.6762	1660
d20190517_MAURITZ	9	2010-02-19 20:59:00	23.61	7.41	12.0932	2852.31
d20190517_MAURITZ	9	2010-04-11 20:59:00	18	12.72	14.1327	2550
d20190517_MAURITZ	9	2010-04-21 20:59:00	22.81	8.04	11.9882	2137.85
d20190517_MAURITZ	9	2010-10-19 01:59:00	12.6775	19.4898	16.0732	3858
d20190517_MAURITZ	9	2010-10-30 03:59:00	21.7757	5.48609	14.8488	2734.62
d20190517_MAURITZ	9	2010-11-20 01:59:00	13.2566	20.2882	11.542	1901.08
d20190517_MAURITZ	9	2010-12-17 08:59:00	21.6654	13.2959	12.2812	1985.54
d20190517_MAURITZ	9	2011-03-20 16:59:00	17.1079	17.5545	10.0862	1480.5
d20190517_MAURITZ	9	2011-05-17 08:59:00	11.3724	8.26485	12.2383	57577.8
d20190517_MAURITZ	11	2010-02-27 01:59:00	28.12	7.75	12.2062	3117.27
d20190517_MAURITZ	11	2010-04-04 20:59:00	17.83	5.99	14.7183	3994.62
d20190517_MAURITZ	11	2010-04-11 20:59:00	18	12.72	15.3008	4551
d20190517_MAURITZ	11	2010-04-21 20:59:00	22.81	8.04	13.7132	4541.54
d20190517_MAURITZ	11	2010-10-19 01:59:00	11.2405	18.7245	17.3538	5788.5
d20190517_MAURITZ	11	2010-10-30 03:59:00	18.4165	8.79689	15.3772	3116.77
d20190517_MAURITZ	11	2010-11-20 01:59:00	12.9355	19.1902	11.8343	2370.46
d20190517_MAURITZ	11	2010-11-27 15:59:00	20.8864	6.42387	8.24467	1279.5
d20190517_MAURITZ	11	2010-12-17 08:59:00	24.6587	8.52855	12.8588	1784.77
d20190517_MAURITZ	11	2011-03-20 16:59:00	16.3204	15.5963	11.6843	2233.5
d20190517_MAURITZ	11	2011-03-23 16:59:00	23.3468	8.98639	12.412	2387.08
d20190517_MAURITZ	11	2011-04-07 16:59:00	18.943	6.33147	14.4623	3954.46
d20190517_MAURITZ	11	2011-05-17 06:59:00	8.34392	12.8221	15.9409	7176.46
d20190517_MAURITZ	13	2010-02-19 13:59:00	16.75	17.72	12.6292	3744
d20190517_MAURITZ	13	2010-02-27 01:59:00	28.12	7.75	12.1737	3120.55
d20190517_MAURITZ	13	2010-03-06 20:59:00	24.92	6.74	11.8675	2863.38
d20190517_MAURITZ	13	2010-04-04 20:59:00	12.94	12.28	14.7938	5012.31
d20190517_MAURITZ	13	2010-04-11 20:59:00	18	12.72	15.7126	5251.5
d20190517_MAURITZ	13	2010-04-21 20:59:00	22.81	8.04	13.9079	3482.31
d20190517_MAURITZ	13	2010-10-06 01:59:00	10.8433	6.38488	17.759	4356
d20190517_MAURITZ	13	2010-10-19 01:59:00	10.9759	21.645	16.9719	4192.36
d20190517_MAURITZ	13	2010-10-30 03:59:00	18.1808	11.3332	14.6848	3120.92
d20190517_MAURITZ	13	2010-11-20 01:59:00	14.0842	18.0832	11.8263	1802.77
d20190517_MAURITZ	13	2010-11-27 15:59:00	19.9809	6.84255	7.00825	1297.5
d20190517_MAURITZ	13	2011-03-20 16:59:00	12.6128	20.0081	11.7691	2490
d20190517_MAURITZ	13	2011-03-25 00:59:00	25.8813	6.86207	12.6885	2888.31
d20190517_MAURITZ	13	2011-04-07 16:59:00	13.9575	8.09284	14.5878	3659.54
d20190517_MAURITZ	13	2011-05-17 06:59:00	7.16675	19.2132	15.6078	6504
d20190517_MAURITZ	13	2011-05-28 20:59:00	7.3758	6.51833	20.9528	5689.38
d20190517_MAURITZ	15	2010-02-19 20:59:00	20.04	13.19	11.999	2760.92
d20190517_MAURITZ	15	2010-04-04 20:59:00	19	8.93	13.9728	4257.69
d20190517_MAURITZ	15	2010-04-11 20:59:00	18	12.72	14.4301	4131
d20190517_MAURITZ	15	2010-04-21 20:59:00	22.81	8.04	12.4178	3856.15
d20190517_MAURITZ	15	2010-10-19 01:59:00	14.2736	17.1351	16.3626	5167.64
d20190517_MAURITZ	15	2010-10-30 03:59:00	19.3491	5.92544	14.9892	4336.62
d20190517_MAURITZ	15	2010-11-20 06:59:00	13.2566	21.0263	11.7542	3422.77
d20190517_MAURITZ	15	2010-12-17 08:59:00	26.3304	9.85688	12.3598	3332.77
d20190517_MAURITZ	15	2011-03-20 16:59:00	17.1681	19.1934	10.9211	2412
d20190517_MAURITZ	15	2011-04-21 12:59:00	16.5638	8.8632	17.123	3120
d20190517_MAURITZ	15	2011-05-17 08:59:00	12.3536	11.2587	14.2741	60745.8
d20190610_SIHI_H2	20	2012-04-24 10:25:00	31.6	1.3	6.50455	515.492
d20190610_SIHI_H2	20	2012-05-08 11:55:00	28.1	9.5	8.10303	663.131
d20190610_SIHI_H2	20	2012-05-28 11:55:00	26	5.6	10.7242	1020.59
d20190610_SIHI_H2	20	2012-06-03 02:25:00	27.3	6.5	10.4613	962.995
d20190610_SIHI_H2	20	2012-06-13 10:25:00	27.3	1.6	12.4645	1190.47
d20190610_SIHI_H2	20	2012-06-25 06:55:00	27.8	10.3	14.875	1443.32
d20190610_SIHI_H2	20	2012-07-23 10:25:00	20.6	1.2	16.5481	1724.41
d20190610_SIHI_H2	20	2012-08-15 09:55:00	16.2	14.7	17.6474	2121.02
d20190610_SIHI_H2	20	2012-09-04 09:55:00	12.8	6.1	15.4	1240.08
d20190610_SIHI_H2	20	2012-09-08 08:55:00	17.2	6.2	16.0615	1453.71
d20190610_SIHI_H2	20	2012-09-21 11:55:00	21.4	2.4	13.5304	857.449
d20190610_SIHI_H2	20	2012-09-26 11:55:00	21.8	1	11.825	632.021
d20190610_SIHI_H2	20	2012-09-29 11:55:00	22.1	10.6	12.613	640.123
d20190610_SIHI_H2	20	2012-10-04 11:55:00	25	3.3	13.4833	830.858
d20190610_SIHI_H2	20	2012-10-07 09:55:00	26.1	2.5	10.536	536.96
d20190610_SIHI_H2	20	2012-10-10 08:55:00	25.9	2.1	9.41304	539.022
d20190610_SIHI_H2	20	2012-10-13 09:55:00	26.1	2.1	8.09583	550.705
d20190610_SIHI_H2	20	2012-10-19 09:55:00	26.3	4.8	11.66	887.647
d20190610_SIHI_H2	20	2012-10-29 10:55:00	25.3	5.1	12.5913	890.558
d20190610_SIHI_H2	20	2012-11-08 11:55:00	26.2	2.8	5.45	288.621
d20190610_SIHI_H2	20	2013-05-19 11:55:00	20.3	3.9	8.45	778.914
d20190610_SIHI_H2	20	2013-06-11 11:55:00	22.3	2.7	11.4913	922.71
d20190610_SIHI_H2	20	2013-06-25 03:55:00	22.8	1.6	15.4154	1388.71
d20190610_SIHI_H2	20	2013-06-28 11:55:00	22.4	3	14.6346	1205.88
d20190610_SIHI_H2	20	2013-07-01 09:55:00	23.4	1.4	14.9962	1326.95
d20190610_SIHI_H2	20	2013-07-17 02:55:00	20.3	1.2	18.0556	1545.88
d20190610_SIHI_H2	20	2013-07-23 10:55:00	19.8	1.2	16.2381	1425.93
d20190610_SIHI_H2	20	2013-07-26 11:55:00	20.5	3.9	16.25	1390.93
d20190610_SIHI_H2	20	2013-08-02 11:55:00	20.3	2.3	15.848	1201.52
d20190610_SIHI_H2	20	2013-08-09 11:55:00	20.3	5.3	16.2	1238.47
d20190610_SIHI_H2	20	2013-08-27 11:55:00	19.8	6	16.6038	1296.86
d20190610_SIHI_H2	20	2013-09-22 11:55:00	21.4	3	13.4136	929.519
d20190610_SIHI_H2	20	2013-10-07 11:55:00	20.6	5.8	11.9885	897.067
d20190610_SIHI_H2	20	2014-06-18 02:55:00	21.8	7.2	13.4231	938.474
d20190610_SIHI_H2	20	2014-06-25 08:55:00	21.6	6.5	13.4304	1016.46
d20190610_SIHI_H2	20	2014-07-15 10:55:00	21.8	4.7	17.524	2475.92
d20190610_SIHI_H2	20	2014-07-28 10:55:00	21.9	1.5	16.3962	1199.25
d20190610_SIHI_H2	20	2014-08-13 06:55:00	20.9	6.2	15.864	2384.73
d20190610_SIHI_H2	20	2014-10-04 10:55:00	19.3	6	12.8667	1765.01
d20190610_SIHI_H2	20	2014-10-16 10:55:00	21.1	9.2	14.4538	843.5
d20190610_SIHI_H2	20	2015-06-21 12:25:00	21.6	8.1	12.2308	678.077
d20190610_SIHI_H2	20	2015-07-01 12:25:00	23.3	1	13.4846	684.888
d20190610_SIHI_H2	20	2015-08-24 12:25:00	20.3	5.6	18.5231	1843.45
d20190610_SIHI_H2	20	2015-09-13 10:25:00	22.5	6.3	15.8846	1195.99
d20190610_SIHI_H2	20	2015-10-01 10:25:00	24.8	1.9	11.3667	553.625
d20190610_SIHI_H2	20	2015-10-09 12:25:00	22.2	4.4	8.49231	414.984
d20190610_SIHI_H2	20	2015-10-13 12:25:00	23	1.2	11.1385	696.276
d20190610_SIHI_H2	21	2012-04-24 10:55:00	30.9	1.5	6.60952	504.468
d20190610_SIHI_H2	21	2012-05-08 12:25:00	26.5	9.5	8.10303	787.576
d20190610_SIHI_H2	21	2012-05-28 02:55:00	23.1	6.2	10.6818	1146
d20190610_SIHI_H2	21	2012-06-03 02:55:00	25.9	8.7	10.2812	1134.93
d20190610_SIHI_H2	21	2012-06-25 07:55:00	27.2	14.8	14.8933	1968.85
d20190610_SIHI_H2	21	2012-08-18 10:25:00	21.2	1.5	17.092	2492.63
d20190610_SIHI_H2	21	2012-09-08 08:25:00	18.2	6.3	16.232	2371.76
d20190610_SIHI_H2	21	2012-09-28 12:25:00	16.3	11.8	12.2583	1309.07
d20190610_SIHI_H2	21	2012-10-03 12:25:00	21.9	3.4	13.404	1119.56
d20190610_SIHI_H2	21	2012-10-10 08:25:00	22.6	6.3	9.7	689.517
d20190610_SIHI_H2	21	2012-10-14 12:25:00	23.1	8	9.58846	814.663
d20190610_SIHI_H2	21	2012-10-20 12:25:00	23.8	4.9	11.4	927.663
d20190610_SIHI_H2	21	2012-10-30 12:25:00	22.6	7.3	12.252	1096.98
d20190610_SIHI_H2	21	2012-11-08 12:25:00	23.3	6.5	5.64615	368.503
d20190610_SIHI_H2	21	2013-05-10 11:55:00	21	1.4	9.47353	780.066
d20190610_SIHI_H2	21	2013-05-20 11:55:00	20.9	5.6	8.51176	815.875
d20190610_SIHI_H2	21	2013-06-13 09:55:00	25.1	1.9	11.8636	858.992
d20190610_SIHI_H2	21	2013-06-23 11:55:00	21.4	5.1	15.2846	1611.71
d20190610_SIHI_H2	21	2013-06-28 11:55:00	22.9	4.2	14.5808	1516.16
d20190610_SIHI_H2	21	2013-07-02 11:55:00	23.8	3.5	15.4962	1392.76
d20190610_SIHI_H2	21	2013-07-17 08:55:00	20.8	5	17.981	1604.56
d20190610_SIHI_H2	21	2013-07-22 10:55:00	20.7	3.1	16.081	1335.9
d20190610_SIHI_H2	21	2013-07-26 11:55:00	21.6	7.4	16.1115	1534.03
d20190610_SIHI_H2	21	2013-07-30 09:55:00	20.9	1.2	16.2615	1171.23
d20190610_SIHI_H2	21	2013-08-02 11:55:00	20.4	1.8	15.5308	1432.96
d20190610_SIHI_H2	21	2013-08-09 11:55:00	20.5	5.5	15.9038	1286.19
d20190610_SIHI_H2	21	2013-08-28 11:55:00	19.4	12.9	15.7923	1368.98
d20190610_SIHI_H2	21	2013-09-11 11:55:00	21.3	10	16.6833	1564.9
d20190610_SIHI_H2	21	2013-09-22 11:55:00	21.5	3.6	13.3318	1056.36
d20190610_SIHI_H2	21	2013-10-07 09:55:00	21.1	11.2	12.1923	952.035
d20190610_SIHI_H2	21	2013-11-02 09:55:00	23.8	1.8	8.09615	520.91
d20190610_SIHI_H2	21	2014-06-10 05:25:00	22	1.2	12.0808	1018.96
d20190610_SIHI_H2	21	2014-06-18 01:25:00	22.6	6.2	13.2286	1046.34
d20190610_SIHI_H2	21	2014-06-25 07:25:00	21.9	9.8	13.287	1143.96
d20190610_SIHI_H2	21	2014-07-15 11:25:00	22.1	7.4	17.096	1581.85
d20190610_SIHI_H2	21	2014-07-23 05:25:00	22.1	1.3	16.7808	1215.68
d20190610_SIHI_H2	21	2014-08-07 11:25:00	21.7	2	15.9423	1338.44
d20190610_SIHI_H2	21	2014-08-13 11:25:00	22.1	9.5	15.6042	1357.68
d20190610_SIHI_H2	21	2014-09-03 01:25:00	21.2	2.8	16.8962	1178.23
d20190610_SIHI_H2	21	2014-10-04 11:25:00	20.2	5	12.7056	666.083
d20190610_SIHI_H2	21	2014-10-16 11:25:00	22.2	7.5	14.1885	861.817
d20190610_SIHI_H2	21	2014-10-21 05:25:00	23.3	5.9	9.43846	635.131
d20190610_SIHI_H2	21	2014-10-24 07:25:00	28	2	9.19615	613.272
d20190610_SIHI_H2	21	2015-06-28 06:55:00	24.3	2.7	12.5444	978.898
d20190610_SIHI_H2	21	2015-07-19 10:55:00	22	3.1	15.252	1581.23
d20190610_SIHI_H2	21	2015-08-11 02:55:00	22.6	8.3	15.575	1307.99
d20190610_SIHI_H2	21	2015-08-23 10:55:00	22.5	1.5	18.0538	2024.49
d20190610_SIHI_H2	21	2015-08-26 10:55:00	22.9	1.4	17.016	1531.17
d20190610_SIHI_H2	21	2015-09-11 04:55:00	21	6.1	15.7923	1211.54
d20190610_SIHI_H2	21	2015-09-13 10:55:00	23.1	4.9	15.852	1232.13
d20190610_SIHI_H2	21	2015-09-29 10:55:00	20.9	13.9	13.65	949.304
d20190610_SIHI_H2	21	2015-10-09 10:55:00	22.9	3.4	8.93846	545.853
d20190610_SIHI_H2	22	2012-05-12 11:25:00	45.6	2.4	8.72353	645.684
d20190610_SIHI_H2	22	2012-05-28 12:25:00	38.3	2.7	11.2353	992.912
d20190610_SIHI_H2	22	2012-06-03 12:25:00	38.9	4.2	10.43	903
d20190610_SIHI_H2	22	2012-06-13 12:25:00	31.1	4	13.0903	1088.27
d20190610_SIHI_H2	22	2012-08-16 06:55:00	14.3	26.3	18.0083	2260.86
d20190610_SIHI_H2	22	2012-09-04 10:55:00	8.2	30.4	15.7036	1923.46
d20190610_SIHI_H2	22	2012-09-07 10:55:00	26.1	11	16.9889	2318.94
d20190610_SIHI_H2	22	2012-09-29 10:55:00	21.3	10.4	12.8846	784.936
d20190610_SIHI_H2	22	2012-10-04 04:55:00	26.5	2.2	13.6136	866.106
d20190610_SIHI_H2	22	2012-10-10 10:55:00	27.6	2.5	9.35	645.497
d20190610_SIHI_H2	22	2012-10-15 10:55:00	28.5	2.8	9.28	695.593
d20190610_SIHI_H2	22	2012-10-19 10:55:00	28.5	2.6	11.8593	851.133
d20190610_SIHI_H2	22	2012-10-29 10:55:00	27.3	4.5	12.6333	817.074
d20190610_SIHI_H2	22	2012-11-08 10:55:00	28.9	2.2	5.01111	301.111
d20190610_SIHI_H2	22	2013-06-11 10:55:00	26.2	2.5	11.9792	739.736
d20190610_SIHI_H2	22	2013-08-08 10:55:00	22.6	5.7	16.8615	1110.97
d20190610_SIHI_H2	22	2013-08-28 10:55:00	21.8	2.8	16.084	1158.98
d20190610_SIHI_H2	22	2013-09-13 06:55:00	24.3	3	15.7318	1232.39
d20190610_SIHI_H2	22	2013-09-21 10:55:00	23.9	2.2	14.4154	1031.27
d20190610_SIHI_H2	22	2013-10-07 10:55:00	22.8	6	11.9731	896.17
d20190610_SIHI_H2	22	2013-10-31 10:55:00	22.5	5.7	9.81923	690.304
d20190610_SIHI_H2	22	2014-06-17 09:55:00	24.2	3.4	14.4417	711.972
d20190610_SIHI_H2	22	2014-06-26 11:55:00	24.1	3.3	14.0731	771.644
d20190610_SIHI_H2	22	2014-07-15 11:55:00	22.9	4.4	18.1538	1268.3
d20190610_SIHI_H2	22	2014-08-14 11:55:00	22.1	3.7	15.7462	1300.01
d20190610_SIHI_H2	22	2014-10-17 11:55:00	22.6	4.8	13.2038	577.487
d20190610_SIHI_H2	22	2014-10-23 11:55:00	24	4.2	8.86154	503.538
d20190610_SIHI_H2	22	2015-06-12 10:55:00	21.4	4.8	14.3885	660.603
d20190610_SIHI_H2	22	2015-06-21 04:55:00	21.3	3.5	12.4615	548.391
d20190610_SIHI_H2	22	2015-08-11 08:55:00	19.7	3.1	16.24	899.063
d20190610_SIHI_H2	22	2015-09-29 10:55:00	18.6	9.1	13.8192	751.359
d20190617_SCOTT_WKG	5	2017-07-03 13:10:00	8.7781	15.5319	24.2716	3381.84
d20190617_SCOTT_WKG	5	2017-08-02 15:19:00	18.537	4.752	24.2819	2272.19
d20190617_SCOTT_WKG	5	2017-08-10 20:22:00	12.592	3.694	25.4362	3202.71
d20190617_SCOTT_WKG	5	2017-08-12 22:17:00	13.874	4.249	24.3575	2728.88
d20190617_SCOTT_WKG	5	2018-02-14 19:15:00	5.7472	14.7848	12.0098	378
d20190617_SCOTT_WKG	5	2018-02-18 23:16:00	15.456	2.825	10.2293	522
d20190617_SCOTT_WKG	5	2018-07-20 23:14:00	10.998	3.409	35.394	1161
d20190617_SCOTT_WKG	5	2019-01-06 07:11:00	15.288	12.459	6.8	327.913
d20190617_SCOTT_WKG	5	2019-01-10 12:10:00	15.267	3.504	7.2925	296.1
d20190617_SCOTT_WKG	5	2019-03-11 23:11:00	10.618	12.53	11.0167	271.5
d20190617_SCOTT_WKG	5	2019-04-18 08:07:00	7.8874	2.8916	18.847	763.953
d20190617_SCOTT_WKG	5	2019-05-12 13:10:00	5.7721	6.8869	18.0979	967.5
d20190617_SCOTT_WKG	6	2017-06-25 15:19:00	3.6316	9.9914	29.8224	2854.36
d20190617_SCOTT_WKG	6	2017-07-03 10:17:00	5.6	9.026	31.3356	2552.29
d20190617_SCOTT_WKG	6	2017-08-10 16:17:00	8.9225	5.6035	27.404	2566.8
d20190617_SCOTT_WKG	6	2017-08-12 20:22:00	11.893	3.1	26.9837	2251.89
d20190617_SCOTT_WKG	6	2017-08-24 08:22:00	7.1271	3.7159	26.0455	1781.23
d20190617_SCOTT_WKG	6	2017-08-27 07:10:00	9.5619	2.6171	27.4283	2104.83
d20190617_SCOTT_WKG	6	2017-11-07 22:17:00	4.2596	3.1301	15.3364	448.364
d20190617_SCOTT_WKG	6	2018-02-27 20:16:00	10.213	2.93	14.092	370.8
d20190617_SCOTT_WKG	6	2018-07-10 15:19:00	4.6208	8.6272	26.1161	1041
d20190617_SCOTT_WKG	6	2018-07-20 18:12:00	8.1658	6.2152	33.4783	2020
d20190617_SCOTT_WKG	6	2018-07-30 09:19:00	6.1347	5.6233	31.4115	1368
d20190617_SCOTT_WKG	6	2018-09-19 16:17:00	4.7627	9.4853	23.6129	1240.29
d20190617_SCOTT_WKG	6	2018-10-01 08:07:00	5.4324	4.8776	22.7509	905.87
d20190617_SCOTT_WKG	6	2018-10-11 12:12:00	5.4324	9.6456	19.6274	470
d20190617_SCOTT_WKG	6	2018-11-30 05:14:00	5.5875	5.1635	12.28	376.941
d20190617_SCOTT_WKG	6	2019-04-18 07:10:00	5.6874	2.7794	20.485	706.5
d20190617_SCOTT_WKG	6	2019-05-14 08:07:00	6.569	3.1936	26.8853	829.837
d20190617_SCOTT_WKG	7	2017-06-25 10:17:00	8.2448	11.9102	30.4713	3967.5
d20190617_SCOTT_WKG	7	2017-07-03 13:10:00	9.8813	12.0157	32.1842	3342.46
d20190617_SCOTT_WKG	7	2017-07-17 08:22:00	17.725	3.587	27.1812	2120.62
d20190617_SCOTT_WKG	7	2017-08-10 11:14:00	16.614	4.827	28.9703	2012.18
d20190617_SCOTT_WKG	7	2018-10-01 12:12:00	11.316	7.572	23.2391	721.915
d20190617_SCOTT_WKG	7	2018-10-13 10:17:00	20.231	4.266	16.8993	448.667
d20190617_SCOTT_WKG	7	2018-11-30 05:14:00	11.339	8.302	11.7117	580.5
d20190617_SCOTT_WKG	7	2019-01-10 12:10:00	18.241	3.31	7.356	452.571
d20190617_SCOTT_WKG	7	2019-04-18 08:07:00	10.407	3.255	22.5657	995.51
d20190617_SCOTT_WKG	7	2019-05-14 08:07:00	12.778	3.836	26.4494	1815.8
d20200417_ARAIN_TP39	3	2008-07-09 10:30:00	10.3	2	18.7589	594.213
d20200417_ARAIN_TP39	3	2008-07-19 17:30:00	6.1	12.9	20.5108	722.359
d20200417_ARAIN_TP39	3	2008-07-26 21:00:00	11.7	1.7	19.016	629.074
d20200417_ARAIN_TP39	3	2008-07-30 13:00:00	11	10.6	19.5426	694.88
d20200417_ARAIN_TP39	3	2008-08-02 06:30:00	11.6	5.8	18.9583	611.356
d20200417_ARAIN_TP39	3	2008-10-21 03:00:00	12.4	2.7	7.93177	270.927
d20200417_ARAIN_TP39	3	2008-11-08 01:30:00	11.7	8.7	8.51057	352.409
d20200417_ARAIN_TP39	3	2008-11-13 07:00:00	13.5	12.9	8.0805	350.002
d20200417_ARAIN_TP39	3	2008-11-15 10:00:00	15.1	13.3	6.37054	234.702
d20200417_ARAIN_TP39	3	2008-11-24 19:00:00	13.4	7	2.23726	147.785
d20200417_ARAIN_TP39	3	2009-03-29 07:00:00	14.6	7.1	3.44442	145.021
d20200417_ARAIN_TP39	3	2009-04-03 07:00:00	14.6	11.6	5.79838	192.121
d20200417_ARAIN_TP39	3	2009-04-06 06:30:00	14.8	1.5	2.94015	169.731
d20200417_ARAIN_TP39	3	2009-04-20 06:30:00	11.4	13.1	6.31359	234.211
d20200417_ARAIN_TP39	3	2009-04-26	13.1	3.6	11.8783	389.701
d20200417_ARAIN_TP39	3	2009-04-28 13:30:00	12.9	4.4	9.69256	298.947
d20200417_ARAIN_TP39	3	2009-04-30 16:30:00	13.5	16.5	11.1354	348.213
d20200417_ARAIN_TP39	3	2009-05-07 00:30:00	12.2	2.9	11.662	409.878
d20200417_ARAIN_TP39	3	2009-05-09 02:00:00	12.6	7.9	11.6111	371.455
d20200417_ARAIN_TP39	3	2009-05-16 07:00:00	12.5	2.6	10.9808	332.42
d20200417_ARAIN_TP39	3	2009-05-29 23:30:00	7.3	3.2	12.3862	355.331
d20200417_ARAIN_TP39	3	2009-06-17 16:00:00	6.3	6.9	14.778	614.034
d20200417_ARAIN_TP39	3	2009-06-20 06:00:00	11	9.7	16.5591	752.625
d20200417_ARAIN_TP39	3	2009-06-25 17:00:00	9.7	10.4	18.7094	814.638
d20200417_ARAIN_TP39	3	2009-06-30 01:00:00	10.2	2.6	17.066	646.401
d20200417_ARAIN_TP39	3	2009-07-02 20:00:00	10.5	5	16.5094	613.675
d20200417_ARAIN_TP39	3	2009-07-17 14:30:00	6.8	11.5	16.2908	540.74
d20200417_ARAIN_TP39	3	2009-07-22 22:00:00	7.6	20.2	17.3661	811.743
d20200417_ARAIN_TP39	3	2009-07-25 16:00:00	13.6	5.3	18.1587	731.316
d20200417_ARAIN_TP39	3	2009-07-29 18:30:00	11.3	16.6	18.6382	711.486
d20200417_ARAIN_TP39	3	2009-08-02 10:30:00	11.8	15.2	18.1079	637.853
d20200417_ARAIN_TP39	3	2009-08-08 19:00:00	9.2	19.2	18.8128	749.381
d20200417_ARAIN_TP39	3	2009-08-11 07:00:00	14.7	7.6	19.6647	771.988
d20200417_ARAIN_TP39	3	2009-08-22 10:00:00	7.2	26.7	18.316	564.319
d20200417_ARAIN_TP39	3	2009-08-26 15:00:00	11.3	4.5	16.894	524.557
d20200417_ARAIN_TP39	3	2009-09-08 01:30:00	8.7	1.2	17.6187	481.92
d20200417_ARAIN_TP39	3	2009-09-25 19:00:00	6.3	4.5	14.739	312.525
d20200417_ARAIN_TP39	3	2009-09-28 08:30:00	8.6	4.3	14.1222	328.948
d20200417_ARAIN_TP39	3	2009-10-02 14:30:00	9.4	4.2	11.106	290.162
d20200417_ARAIN_TP39	3	2009-10-06 23:30:00	10.8	2.1	11.2057	281.135
d20200417_ARAIN_TP39	3	2009-10-09 16:30:00	11.3	6.7	10.5413	305.448
d20200417_ARAIN_TP39	3	2009-10-16 04:00:00	11.7	1.8	6.00262	164.382
d20200417_ARAIN_TP39	3	2009-10-23 12:00:00	11.1	13	9.23839	239.831
d20200417_ARAIN_TP39	3	2009-10-28 09:30:00	12.3	5.9	10.0669	358.647
d20200417_ARAIN_TP39	3	2009-10-31 07:00:00	12.5	8.5	9.75897	280.354
d20200417_ARAIN_TP39	3	2009-11-05 02:30:00	12.5	1.7	5.63296	195.521
d20200417_ARAIN_TP39	3	2009-11-19 05:30:00	11	15.4	7.60596	206.116
d20200417_ARAIN_TP39	3	2009-11-27 01:00:00	14.2	7.8	5.2457	179.879
d20200417_ARAIN_TP39	3	2009-12-02 22:00:00	14.2	14.9	5.40593	157.242
d20200417_ARAIN_TP39	3	2009-12-09 05:30:00	13.5	15.6	2.70438	89.564
d20200417_ARAIN_TP39	3	2010-03-22 15:30:00	12.4	2.1	3.01862	92.6382
d20200417_ARAIN_TP39	3	2010-03-28 18:00:00	12.2	10	3.50093	121.955
d20200417_ARAIN_TP39	3	2010-04-07 22:00:00	16.7	10.5	8.54997	190.253
d20200417_ARAIN_TP39	3	2010-08-21 22:00:00	6.3	3.3	20.0561	467.009
d20200417_ARAIN_TP39	3	2010-09-28 03:30:00	6.8	1.1	14.096	316.883
d20200417_ARAIN_TP39	3	2010-10-02 15:30:00	7.1	4.7	10.2088	212.457
d20200417_ARAIN_TP39	3	2010-10-05 03:00:00	9.1	2.7	10.0245	234.344
d20200417_ARAIN_TP39	3	2010-10-11 23:30:00	8.2	2.8	11.0029	251.922
d20200417_ARAIN_TP39	3	2010-10-14 07:00:00	9.2	5.9	10.1846	251.24
d20200417_ARAIN_TP39	3	2010-10-26 20:00:00	10.2	6.5	12.3366	265.664
d20200417_ARAIN_TP39	3	2010-11-16 21:00:00	9.2	7.5	6.66507	162.727
d20200417_ARAIN_TP39	3	2010-11-22 11:30:00	11.1	10.4	8.49402	190.079
d20200417_ARAIN_TP39	3	2010-11-25 14:30:00	12.2	8.8	5.0229	131.068
d20200417_ARAIN_TP39	3	2010-11-30 09:00:00	11.7	11.9	5.23733	144.691
d20200417_ARAIN_TP39	3	2011-04-16 08:00:00	11	12.1	5.25046	63.9145
d20200417_ARAIN_TP39	3	2011-04-20 02:30:00	13.4	12.6	3.77815	109.896
d20200417_ARAIN_TP39	3	2011-04-22 22:30:00	14	17.2	6.35033	110.266
d20200417_ARAIN_TP39	3	2011-05-03 06:00:00	13.4	7.7	7.37822	182.024
d20200417_ARAIN_TP39	3	2011-05-27 01:00:00	15.8	2.5	13.7598	359.023
d20200417_ARAIN_TP39	3	2011-06-04 14:00:00	8.8	5.9	15.0512	342.922
d20200417_ARAIN_TP39	3	2011-06-22 03:00:00	6.3	4.4	17.9059	543.149
d20200417_ARAIN_TP39	3	2011-06-24 09:00:00	8.9	2.4	16.9821	495.251
d20200417_ARAIN_TP39	3	2011-07-24 03:00:00	6	1.9	22.0774	509.942
d20200417_ARAIN_TP39	3	2011-07-28 09:00:00	6.3	3.5	20.5226	564.525
d20200417_ARAIN_TP39	3	2011-08-03 13:00:00	6.3	8.1	20.3489	585.669
d20200417_ARAIN_TP39	3	2011-08-07 23:00:00	7	11.7	20.567	676.506
d20200417_ARAIN_TP39	3	2011-09-15 07:00:00	6.1	1.2	13.1188	265.09
d20200417_ARAIN_TP39	3	2011-09-30 03:00:00	12.9	12.3	12.7654	327.843
d20200417_ARAIN_TP39	3	2011-10-02 17:30:00	11.9	4	10.9932	313.959
d20200417_ARAIN_TP39	3	2011-10-14 00:30:00	13.2	13.4	13.5035	348.048
d20200417_ARAIN_TP39	3	2011-10-19 06:00:00	11.1	11.8	10.8272	300.928
d20200417_ARAIN_TP39	3	2012-04-21 04:30:00	9.7	7.6	7.86109	182.939
d20200417_ARAIN_TP39	3	2012-04-23 19:00:00	12.2	4.3	5.91273	149.507
d20200417_ARAIN_TP39	3	2012-05-04 03:30:00	12.2	5.6	13.1478	302.407
d20200417_ARAIN_TP39	3	2012-05-07 17:00:00	11.5	5.5	12.2987	325.309
d20200417_ARAIN_TP39	3	2012-06-06 16:30:00	9.7	6.3	13.9403	426.586
d20200417_ARAIN_TP39	3	2012-06-12 00:30:00	8.8	3.3	16.8593	428.94
d20200417_ARAIN_TP39	3	2012-08-27 15:30:00	6.1	7.5	19.4887	560.366
d20200417_ARAIN_TP39	3	2012-09-04 18:00:00	6.2	7.4	20.1647	555.131
d20200417_ARAIN_TP39	3	2013-11-11 20:00:00	11.6	2	4.32057	92.4471
d20200417_ARAIN_TP39	3	2014-10-14 23:30:00	11	3.8	13.767	251.842
d20200417_ARAIN_TP39	3	2014-12-24 19:30:00	12.7	1.6	3.5355	50.3001
d20200417_ARAIN_TP39	3	2015-05-05 20:30:00	8.8	1.4	10.9914	91.4612
d20200417_ARAIN_TP39	3	2015-06-08 03:00:00	8.3	11.5	15.2377	323.105
d20200417_ARAIN_TP39	3	2015-06-12 04:30:00	10.4	2.5	15.994	636.199
d20200417_ARAIN_TP39	3	2015-06-16 08:30:00	11.8	2.4	17.4036	848.693
d20200417_ARAIN_TP39	3	2015-06-22 22:00:00	8.9	11.3	17.8928	844.675
d20200417_ARAIN_TP39	3	2015-06-27 05:30:00	9.4	14.1	15.0536	722.146
d20200417_ARAIN_TP39	3	2015-07-19 21:30:00	9	7.7	19.8247	1092.74
d20200417_ARAIN_TP39	3	2015-08-20 11:30:00	5.4	5.8	19.0411	521.391
d20200417_ARAIN_TP39	3	2016-04-26 06:00:00	8.9	2.6	6.30254	36.7482
d20200417_ARAIN_TP39	3	2016-06-16 16:30:00	6.1	1.5	16.0202	5.90885
d20200417_ARAIN_TP39	3	2016-06-27 05:00:00	5.8	1.9	19.0735	4.74004
d20200417_ARAIN_TP39	3	2017-03-01 02:30:00	12.3	7.4	4.54206	66.0825
d20200417_ARAIN_TP39	3	2017-03-26 21:30:00	13.9	4.9	5.47408	211.367
d20200417_ARAIN_TP39	3	2017-03-30 14:30:00	12.3	10.4	3.33476	152.967
d20200417_ARAIN_TP39	3	2017-04-04 00:30:00	12.2	8.3	6.65109	237.829
d20200417_ARAIN_TP39	3	2017-04-06 12:00:00	12.9	7.2	4.55895	185.887
d20200417_ARAIN_TP39	3	2017-04-11 00:30:00	11.5	1.4	9.19935	310.768
d20200417_ARAIN_TP39	3	2017-04-19 15:00:00	10	7.8	8.84186	356.174
d20200417_ARAIN_TP39	3	2017-04-30 08:30:00	9.8	12.4	9.18892	351.359
d20200417_ARAIN_TP39	3	2017-05-04 15:30:00	12.1	6.1	7.83453	302.245
d20200417_ARAIN_TP39	3	2017-08-07 10:30:00	5.6	2	17.4423	1.8896
d20200417_ARAIN_TP39	3	2017-08-11 03:00:00	5.5	3.1	18.6844	28.1799
d20200417_ARAIN_TP39	3	2017-08-17 16:30:00	5.8	4	19.0718	25.6939
d20200417_ARAIN_TP39	3	2017-09-08 01:00:00	7.2	2.9	13.6217	5.86226
d20200417_ARAIN_TP39	3	2017-10-25 03:00:00	10.2	3.7	10.9955	1.59184
d20200417_ARAIN_TP39	3	2017-10-30 17:30:00	9.1	2.5	8.24614	1.81506
d20200417_ARAIN_TP39	3	2018-05-03 05:00:00	10.3	2.8	11.6485	256.852
d20200417_ARAIN_TP39	3	2018-05-10 05:30:00	9.6	8.6	11.7119	237.395
d20200417_ARAIN_TP39	3	2018-05-12 06:30:00	12.2	10.1	8.62875	236.637
d20200417_ARAIN_TP39	3	2018-06-22 16:30:00	6.6	4.3	16.1103	207.66
d20200417_ARAIN_TP39	3	2018-06-27 16:30:00	10.2	1.2	17.1589	430.624
d20200417_ARAIN_TP39	3	2018-08-27 08:30:00	6.2	2.4	21.4014	22.9434
d20200417_ARAIN_TP39	8	2010-05-05 20:00:00	9	9.9	11.9498	230.735
d20200417_ARAIN_TP39	8	2010-08-21 22:00:00	6.3	3.3	20.0548	571.578
d20200417_ARAIN_TP39	8	2010-09-03 15:00:00	6.2	1	17.7588	345.129
d20200417_ARAIN_TP39	8	2010-10-11 23:30:00	8.2	2.8	11.0501	269.719
d20200417_ARAIN_TP39	8	2010-10-14 06:30:00	9.2	5.9	10.1982	280.691
d20200417_ARAIN_TP39	8	2010-10-26 19:30:00	10.2	6.5	12.3644	322.329
d20200417_ARAIN_TP39	8	2010-11-16 20:30:00	9.2	7.5	6.66069	201.189
d20200417_ARAIN_TP39	8	2010-11-22 11:30:00	11.1	10.4	8.48282	234.885
d20200417_ARAIN_TP39	8	2010-11-25 14:00:00	12.2	8.8	4.96743	167.602
d20200417_ARAIN_TP39	8	2010-11-30 09:00:00	11.7	11.9	5.23019	178.489
d20200417_ARAIN_TP39	8	2011-04-16 08:00:00	11	12.1	5.30956	135.349
d20200417_ARAIN_TP39	8	2011-04-20 02:30:00	13.4	12.6	3.77129	125.618
d20200417_ARAIN_TP39	8	2011-04-22 14:30:00	14.2	17	5.85869	164.195
d20200417_ARAIN_TP39	8	2011-04-25 16:30:00	13.6	10	7.88101	234.078
d20200417_ARAIN_TP39	8	2011-05-03 06:00:00	13.4	7.7	7.37098	185.908
d20200417_ARAIN_TP39	8	2011-05-27 01:00:00	15.8	2.5	13.7598	423.553
d20200417_ARAIN_TP39	8	2011-06-04 14:00:00	8.8	5.9	15.0955	385.01
d20200417_ARAIN_TP39	8	2011-06-07 09:00:00	9.4	10.9	17.7611	490.071
d20200417_ARAIN_TP39	8	2011-06-22 03:00:00	6.3	4.4	17.9066	598.894
d20200417_ARAIN_TP39	8	2011-06-24 08:30:00	8.9	2.4	17.0212	574.033
d20200417_ARAIN_TP39	8	2011-07-24 03:00:00	6	1.9	22.087	588.473
d20200417_ARAIN_TP39	8	2011-07-28 09:00:00	6.3	9.6	21.0316	706.407
d20200417_ARAIN_TP39	8	2011-08-03 13:00:00	6.3	8.1	20.3416	651.147
d20200417_ARAIN_TP39	8	2011-08-07 22:30:00	7	11.7	20.5771	729.507
d20200417_ARAIN_TP39	8	2011-08-20 05:30:00	5.8	8	19.4985	544.196
d20200417_ARAIN_TP39	8	2011-09-04 06:00:00	5.6	4.5	19.1316	588.447
d20200417_ARAIN_TP39	8	2011-09-08 06:00:00	6.6	1.6	17.2898	533.662
d20200417_ARAIN_TP39	8	2011-09-15 07:00:00	6.1	1.2	13.1031	334.391
d20200417_ARAIN_TP39	8	2011-09-29 14:30:00	12.8	12.4	13.7395	443.314
d20200417_ARAIN_TP39	8	2011-10-02 17:30:00	11.9	4	11.0297	374.781
d20200417_ARAIN_TP39	8	2011-10-14 00:30:00	13.2	13.4	13.4601	434.954
d20200417_ARAIN_TP39	8	2011-10-19 06:00:00	11.1	11.8	10.8289	370.425
d20200417_ARAIN_TP39	8	2012-04-21 04:00:00	9.7	7.6	7.85307	206.577
d20200417_ARAIN_TP39	8	2012-04-23 19:00:00	12.2	4.3	5.88072	152.106
d20200417_ARAIN_TP39	8	2012-05-04 03:00:00	12.2	5.4	13.1857	349.625
d20200417_ARAIN_TP39	8	2012-05-07 17:30:00	11.5	5.5	12.303	366.86
d20200417_ARAIN_TP39	8	2012-06-06 16:30:00	9.7	6.3	13.9493	435.057
d20200417_ARAIN_TP39	8	2012-06-11 23:00:00	8.8	3.4	17.2787	523.022
d20200417_ARAIN_TP39	8	2012-08-27 00:30:00	6.1	7.5	19.6703	491.805
d20200417_ARAIN_TP39	8	2012-09-04 18:00:00	6.2	7.4	20.0444	500.556
d20200417_ARAIN_TP39	8	2013-11-11 19:30:00	11.6	2	4.38294	155.514
d20200417_ARAIN_TP39	8	2014-11-23 16:00:00	16.1	1.7	3.17546	107.454
d20200417_ARAIN_TP39	8	2014-12-24 18:30:00	12.8	1.5	3.55528	74.5987
d20200417_ARAIN_TP39	8	2015-04-16 21:00:00	11.1	3.4	7.6193	214.692
d20200417_ARAIN_TP39	8	2015-05-05 20:30:00	8.8	1.4	10.9914	121.778
d20200417_ARAIN_TP39	8	2015-06-07 21:30:00	8.3	8.3	15.2441	97.0025
d20200417_ARAIN_TP39	8	2015-06-12 02:00:00	10.4	1.6	15.3871	83.2686
d20200417_ARAIN_TP39	8	2015-07-19 18:30:00	9.2	4.2	19.7054	9.27661
d20200417_ARAIN_TP39	8	2015-08-19 21:00:00	5.4	5.8	19.8927	11.5112
d20200417_ARAIN_TP39	8	2016-04-26 00:30:00	8.9	2.6	6.19	3.16595
d20200417_ARAIN_TP39	8	2016-05-14 10:30:00	11.8	3.7	9.09349	282.721
d20200417_ARAIN_TP39	8	2016-06-16 13:00:00	6.6	1	16.0275	5.2626
d20200417_ARAIN_TP39	8	2016-06-27 04:30:00	5.8	1.9	18.935	4.88815
d20200417_ARAIN_TP39	8	2016-08-26 18:30:00	5.3	1	20.9911	6.51315
d20200417_ARAIN_TP39	8	2017-03-01 02:00:00	12.3	7.3	4.98072	51.755
d20200417_ARAIN_TP39	8	2017-03-26 21:00:00	13.9	4.9	5.45916	220.153
d20200417_ARAIN_TP39	8	2017-03-30 14:30:00	12.3	10.4	3.33476	165.728
d20200417_ARAIN_TP39	8	2017-04-04 00:30:00	12.2	7.9	6.65809	237.602
d20200417_ARAIN_TP39	8	2017-04-06 12:00:00	12.9	7.2	4.55338	186.045
d20200417_ARAIN_TP39	8	2017-04-11	11.5	1.3	9.15012	301.923
d20200417_ARAIN_TP39	8	2017-04-19 15:00:00	10	7.8	8.64721	355.533
d20200417_ARAIN_TP39	8	2017-04-30 08:30:00	9.8	11.5	8.99459	331.227
d20200417_ARAIN_TP39	8	2017-05-04 15:30:00	12.1	6.1	7.82868	310.857
d20200417_ARAIN_TP39	8	2017-05-21 16:30:00	7.2	4.3	12.8291	480.636
d20200417_ARAIN_TP39	8	2017-06-03 21:30:00	8	3.8	14.7775	605.783
d20200417_ARAIN_TP39	8	2017-06-27 06:00:00	7.8	3.2	15.4892	661.528
d20200417_ARAIN_TP39	8	2017-10-25 01:30:00	10.2	3.5	10.7178	1.41386
d20200417_ARAIN_TP39	8	2017-10-30 17:00:00	9.1	2.5	8.25	1.84587
d20200417_ARAIN_TP39	8	2018-04-24 21:00:00	11.6	6.1	6.47992	226.858
d20200417_ARAIN_TP39	8	2018-05-03 04:30:00	10.3	2.6	12.0421	380.876
d20200417_ARAIN_TP39	8	2018-05-10 06:30:00	9.6	7.3	11.4455	359.335
