# Supplementary material for: Validating laboratory predictions of soil rewetting respiration pulses using field data
Source: Copernicus journal article supplement (doi:10.5194/bg-22-2691-2025), 2025-06-13
Supplement: Supplementary file 1 [file bg-22-2691-2025-supplement.zip]

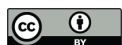

## *Supplement of*

# **Validating laboratory predictions of soil rewetting respiration pulses using field data**

**Xiankun Li et al.**

*Correspondence to:* Xiankun Li ([xiankun.li@natgeo.su.se](mailto:xiankun.li@natgeo.su.se))

- [bg-22-2691-2025-supplement-title-page.pdf](#)
- [Supplement S1.xlsx](#)
- [Supplement S2 - Study list of laboratory data.docx](#)

The copyright of individual parts of the supplement might differ from the article licence.
