# Supplementary material for: Validating laboratory predictions of soil rewetting respiration pulses using field data
Source: Copernicus journal article supplement (doi:10.5194/bg-22-2691-2025), 2025-06-13
Supplement: Supplementary file 3 [file Supplement S2 - Study list of laboratory data.docx]

***Supplementary materials***

***Validating laboratory predictions of soil rewetting respiration pulses using field data***

Authors: Xiankun Li 1,2,*, Marleen Pallandt 1,2, Dilip Naidu3,4, Johannes Rousk5, Gustaf Hugelius 1,2, Stefano Manzoni 1,2

1Department of Physical Geography, Stockholm University, Stockholm, 10691, Sweden

2Bolin Centre for Climate Research, Stockholm University, Stockholm, 10691, Sweden

3Divecha Centre for Climate Change, Indian Institute of Science, Bengaluru 560012, India

4School of Environment and Sustainability, Indian Institute for Human Settlements, Bengaluru 560080, India

5Microbial Ecology, Department of Biology, Lund University, Lund, 22362, Sweden

**Study list of laboratory data**

Butterly, C. R., Bunemann, E. K., McNeill, A. M., Baldock, J. A., and Marschner, P.: Carbon pulses but not phosphorus pulses are related to decreases in microbial biomass during repeated drying and rewetting of soils, Soil Biol. Biochem., 41, 1406–1416, https://doi.org/10.1016/j.soilbio.2009.03.018, 2009.

Chen, H., Jarosch, K. A., Mészáros, É., Frossard, E., Zhao, X., and Oberson, A.: Repeated drying and rewetting differently affect abiotic and biotic soil phosphorus (P) dynamics in a sandy soil: A 33P soil incubation study, Soil Biol. Biochem., 153, 108079, https://doi.org/10.1016/j.soilbio.2020.108079, 2021.

Chen, K., Huo, T., Zhang, Y., Guo, T., and Liang, J.: Response of soil organic carbon decomposition to intensified water variability co-determined by the microbial community and aggregate changes in a temperate grassland soil of northern China, Soil Biol. Biochem., 176, 108875, https://doi.org/10.1016/j.soilbio.2022.108875, 2023.

Chen, X.: Response of soil organic carbon mineralization to drying–rewetting events after long-term drought in a subtropical forest, Master's thesis, East China Normal University, China, 2022. (In Chinese)

Denef, K., Six, J., Bossuyt, H., Frey, S. D., Elliott, E. T., Merckx, R., and Paustian, K.: Influence of dry–wet cycles on the interrelationship between aggregate, particulate organic matter, and microbial community dynamics, Soil Biol. Biochem., 33, 1599–1611, https://doi.org/10.1016/S0038-0717(01)00076-1, 2001.

Evans, S. E. and Wallenstein, M. D.: Soil microbial community response to drying and rewetting stress: does historical precipitation regime matter?, Biogeochemistry, 109, 101–116, https://doi.org/10.1007/s10533-011-9638-3, 2012.

Fan, C. P., Hu, Y. L., Lai, J. T., and Zeng, D. H.: Effects of drying and rewetting on soil C and N mineralization rates in Mongolian pine plantation in a semi-arid region, Chin. J. Ecol., 34, 3360–3367, 2015. (In Chinese)

Guo, X. B., Drury, C. F., Yang, X. M., Reynolds, W. D., and Zhang, R. D.: Impacts of Wet-Dry Cycles and a Range of Constant Water Contents on Carbon Mineralization in Soils under Three Cropping Treatments, Soil Sci. Soc. Am. J., 76, 485–493, https://doi.org/10.2136/sssaj2011.0315, 2012.

Hicks, L. C., Lin, S., and Rousk, J.: Microbial resilience to drying-rewetting is partly driven by selection for quick colonizers, Soil Biol. Biochem., 167, 108581, https://doi.org/10.1016/j.soilbio.2022.108581, 2022.

Huang, S.-D., Ye, G.-F., Lin, J., Ruan, H.-H., Jin, C.-S., Li, Y.-Y., and Chen, J.: Effects of drying-wetting cycles on soil organic carbon mineralization along an elevation gradient in Wuyi Mountain, Chin. J. Ecol., 37, 312–321, 2018. (In Chinese)

Jiao, P., Xiao, H., Li, Z., Yang, L., and Zheng, P.: Drying-rewetting cycles reduce bacterial diversity and carbon loss in soil on the Loess Plateau of China, Pedosphere, 3, 838-848, https://doi.org/10.1016/j.pedsph.2022.09.002, 2022.

Li, J. T., Wang, J. J., Zeng, D. H., Zhao, S. Y., Huang, W. L., Sun, X. K., and Hu, Y. L.: The influence of drought intensity on soil respiration during and after multiple drying-rewetting cycles, Soil Biol. Biochem., 127, 82–89, https://doi.org/10.1016/j.soilbio.2018.09.018, 2018.

Matthews, K. E., Facelli, J. M., and Cavagnaro, T. R.: Response of soil microbial community structure, carbon and nitrogen cycling to drying and rewetting, Appl. Soil Ecol., 192, 105099,https://doi.org/10.1016/j.apsoil.2023.105099, 2023.

Meng, W. Q., Mo, X., Hu, B., He, M., and Li, H.: Effects of drying-rewetting alternation on soil organic carbon in wetland, Chin. J. Soil Sci., 4, 910–915, 2015. (In Chinese)

Mikha, M. M., Rice, C. W., and Milliken, G. A.: Carbon and nitrogen mineralization as affected by drying and wetting cycles, Soil Biol. Biochem., 37, 339–347, https://doi.org/10.1016/j.soilbio.2004.08.003, 2005.

Miller, A., Schimel, J., Meixner, T., Sickman, J., and Melack, J.: Episodic rewetting enhances carbon and nitrogen release from chaparral soils, Soil Biol. Biochem., 37, 2195–2204, https://doi.org/10.1016/j.soilbio.2005.03.021, 2005.

Muhr, J., Goldberg, S. D., Borken, W., and Gebauer, G.: Repeated drying–rewetting cycles and their effects on the emission of CO2, N2O, NO, and CH4 in a forest soil, J Plant Nutr Soil Sci., 171, 719–728, https://doi.org/10.1002/jpln.200700302, 2008.

Nagano, H., Atarashi-Andoh, M., and Koarashi, J.: Effect of dry-wet cycles on carbon dioxide release from two different volcanic ash soils in a Japanese temperate forest, Soil Sci. Plant Nutr., 65, 525–533, https://doi.org/10.1080/00380768.2019.1649976, 2019.

Najera, F., Dippold, M. A., Boy, J., Seguel, O., Koester, M., Stock, S., Merino, C., Kuzyakov, Y., and Matus, F.: Effects of drying/rewetting on soil aggregate dynamics and implications for organic matter turnover, Biol. Fertil. Soils, 56, 893–905, https://doi.org/10.1007/s00374-020-01469-6, 2020.

Niu, B., Zhao, C., Feng, G., and Tang, G.: Effects of alternate drying and rewetting on soil CO₂ emissions in oasis farmlands of Xinjiang Region, Bull. Soil Water Conserv., 36, 74–80, 2016. (In Chinese)

de Nijs, E. A., Hicks, L. C., Leizeaga, A., Tietema, A., and Rousk, J.: Soil microbial moisture dependences and responses to drying–rewetting: The legacy of 18 years drought, Glob. Change Biol., 25, 1005–1015, <https://doi.org/10.1111/gcb.14508>, 2018.

Ouyang, Y. and Li, X.: Effect of repeated drying-rewetting cycles on soil extracellular enzyme activities and microbial community composition in arid and semi-arid ecosystems, Eur. J. Soil Biol., 98, 103187, https://doi.org/10.1016/j.ejsobi.2020.103187, 2020.

Qi, J., Markewitz, D., Foroughi, M., Jokela, E., Strahm, B., and Vogel, J.: Drying-Wetting Cycles: Effect on Deep Soil Carbon, Soil Syst., 2, 3, https://doi.org/10.3390/soils2010003, 2018.

Rodríguez, A., Durán, J., Rey, A., Boudouris, I., Valladares, F., Gallardo, A., and Yuste, J. C.: Interactive effects of forest die-off and drying-rewetting cycles on C and N mineralization, Geoderma, 333, 81–89, https://doi.org/10.1016/j.geoderma.2018.07.003, 2019.

Sawada, K., Funakawa, S., and Kosaki, T.: Effect of repeated drying–rewetting cycles on microbial biomass carbon in soils with different climatic histories, Appl. Soil Ecol., 120, 1–7, https://doi.org/10.1016/j.apsoil.2017.07.023, 2017.

Shi, A. and Marschner, P.: Drying and rewetting frequency influences cumulative respiration and its distribution over time in two soils with contrasting management, Soil Biol. Biochem., 72, 172–179, https://doi.org/10.1016/j.soilbio.2014.02.001, 2014.

Shi, A. and Marschner, P.: Soil respiration and microbial biomass in multiple drying and rewetting cycles – Effect of glucose addition, Geoderma, 305, 219–227, https://doi.org/10.1016/j.geoderma.2017.06.010, 2017.

Tiemann, L. K. and Billings, S. A.: Changes in variability of soil moisture alter microbial community C and N resource use, Soil Biol. Biochem., 43, 1837–1847, https://doi.org/10.1016/j.soilbio.2011.04.020, 2011.

Wang, J., Song, X., and Wang, Y.: Multiple drying-wetting cycles on mineralization of organic carbon in soil, Environ. Sci. Technol., 36, 31–35, 2013. (In Chinese)

Wang, Y., Song, X., Wang, J., Yan, D., Wang, Y., and Zhou, B.: Effects of alternating wet and dry conditions on soil carbon pools and organic carbon mineralization, Acta Pedol. Sin., 51, 342–350, 2014. (In Chinese)

Wu, J. and Brookes, P. C.: The proportional mineralisation of microbial biomass and organic matter caused by air-drying and rewetting of a grassland soil, Soil Biology and Biochemistry, 37, 507–515, https://doi.org/10.1016/j.soilbio.2004.07.043, 2005.

Yang, F., Lee, X., Theng, B. K. G., Wang, B., Cheng, J., and Wang, Q.: Effect of biochar addition on short-term N2O and CO2 emissions during repeated drying and wetting of an anthropogenic alluvial soil, Environ. Geochem. Health., 39, 635–647, https://doi.org/10.1007/s10653-016-9838-9, 2017.

Yang, X., Jiang, N., and Sun, D.: Dry–wet cycles induce the decoupling of carbon and nitrogen mineralization at high temperatures in semi-arid grassland soil, Soil Biol. Biochem., 188, 109227, https://doi.org/10.1016/j.soilbio.2023.109227, 2024.

Yemadje, P. L., Chevallier, T., Guibert, H., Bertrand, I., and Bernoux, M.: Wetting-drying cycles do not increase organic carbon and nitrogen mineralization in soils with straw amendment, Geoderma, 304, 68–75, https://doi.org/10.1016/j.geoderma.2016.06.023, 2017.

Yu, Z., Wang, G., and Marschner, P.: Drying and rewetting – Effect of frequency of cycles and length of moist period on soil respiration and microbial biomass, Eur. J. Soil Biol., 62, 132–137, https://doi.org/10.1016/j.ejsobi.2014.03.007, 2014.

Zhang, K., Qiu, Y., Zhao, Y., Wang, S., Deng, J., Chen, M., Xu, X., Wang, H., Bai, T., and He, T.: Moderate precipitation reduction enhances nitrogen cycling and soil nitrous oxide emissions in a semi‐arid grassland, Glob. Change Biol., 29, 3114–3129, <https://doi.org/10.1111/gcb.16672>, 2023.

Zhang, Z., Wang, D., and Li, M.: Soil respiration, aggregate stability and nutrient availability affected by drying duration and drying-rewetting frequency, Geoderma, 413, 115743, https://doi.org/10.1016/j.geoderma.2022.115743, 2022.
